# Supplementary material for: Epidemiology of depressive disorders in people living with hypertension in Africa: a systematic review and meta-analysis
Source: PubMed Central journal article supplement — BMJ Open. 2020 Dec 10;10(12):e037975. doi: 10.1136/bmjopen-2020-037975 (PMC7733170; doi:10.1136/bmjopen-2020-037975), 2020-12-10

# Epidemiology of depressive disorders in people living with hypertension in Africa: a systematic review and meta-analysis

Francky Teddy **Endomba**, Mazou N. **Temgoua**, Jean Joel **Bigna**

## APPENDIX

|                                                                                                 |   |
|-------------------------------------------------------------------------------------------------|---|
| Supplementary Table 1. Search strategy.....                                                     | 2 |
| Supplementary Table 2. Methodological quality of included studies.....                          | 4 |
| Supplementary Figure 1. PRISMA flow diagram .....                                               | 5 |
| Supplementary Figure 2. Meta-analysis prevalence of depressive disorders by setting.....        | 6 |
| Supplementary Figure 3. Meta-analysis prevalence of depressive symptoms by setting .....        | 6 |
| Supplementary Figure 4. Meta-analysis prevalence of major depressive disorders by setting ..... | 7 |
| Supplementary Figure 5. Meta-analysis prevalence of depressive disorders by sex.....            | 8 |
| Supplementary Figure 6. Meta-analysis prevalence of depressive symptoms by sex .....            | 8 |

Supplementary Table 1. Search strategy

| Search | Search terms                                                                                                                                                                                                                                                                                                                                                                                                                                                                                                                                                                                                                                                                                                                                                                                                                                                                                                                                                                                                                                                                                                                                                                                                                                                                                                                                                                                                                                                                                                                                                                                                                                                                                                                                                                                                                                                                                                                                                                                                                                                                                                                                                                                                                                                                                                                                                                                                                                                                                                                                                                                                                                                                                                                                                                                                                       |
|--------|------------------------------------------------------------------------------------------------------------------------------------------------------------------------------------------------------------------------------------------------------------------------------------------------------------------------------------------------------------------------------------------------------------------------------------------------------------------------------------------------------------------------------------------------------------------------------------------------------------------------------------------------------------------------------------------------------------------------------------------------------------------------------------------------------------------------------------------------------------------------------------------------------------------------------------------------------------------------------------------------------------------------------------------------------------------------------------------------------------------------------------------------------------------------------------------------------------------------------------------------------------------------------------------------------------------------------------------------------------------------------------------------------------------------------------------------------------------------------------------------------------------------------------------------------------------------------------------------------------------------------------------------------------------------------------------------------------------------------------------------------------------------------------------------------------------------------------------------------------------------------------------------------------------------------------------------------------------------------------------------------------------------------------------------------------------------------------------------------------------------------------------------------------------------------------------------------------------------------------------------------------------------------------------------------------------------------------------------------------------------------------------------------------------------------------------------------------------------------------------------------------------------------------------------------------------------------------------------------------------------------------------------------------------------------------------------------------------------------------------------------------------------------------------------------------------------------------|
| #1     | 'africa'/exp OR africa OR 'algeria'/exp OR algeria OR 'angola'/exp OR angola OR 'benin'/exp OR benin OR 'botswana'/exp OR botswana OR 'burkina faso'/exp OR 'burkina faso' OR 'burundi'/exp OR burundi OR 'cameroon'/exp OR cameroon OR 'canary islands'/exp OR 'canary islands' OR 'cape verde'/exp OR 'cape verde' OR 'central african republic'/exp OR 'central african republic' OR 'chad'/exp OR chad OR 'comoros'/exp OR comoros OR 'congo'/exp OR congo OR 'democratic republic of congo' OR 'djibouti'/exp OR djibouti OR 'egypt'/exp OR egypt OR 'equatorial guinea'/exp OR 'equatorial guinea' OR 'eritrea'/exp OR eritrea OR 'ethiopia'/exp OR ethiopia OR 'gabon'/exp OR gabon OR 'gambia'/exp OR gambia OR 'ghana'/exp OR ghana OR 'guinea'/exp OR guinea OR 'guinea bissau'/exp OR 'guinea bissau' OR 'ivory coast'/exp OR 'ivory coast' OR 'cote ivoire' OR 'jamahiriya' OR 'kenya'/exp OR kenya OR 'lesotho'/exp OR lesotho OR 'liberia'/exp OR liberia OR 'libya'/exp OR libya OR 'madagascar'/exp OR madagascar OR 'malawi'/exp OR malawi OR 'mali'/exp OR mali OR 'mauritania'/exp OR mauritania OR 'mauritius'/exp OR mauritius OR 'mayotte'/exp OR mayotte OR 'morocco'/exp OR morocco OR 'mozambique'/exp OR mozambique OR 'namibia'/exp OR namibia OR 'niger'/exp OR niger OR 'nigeria'/exp OR nigeria OR 'principe' OR 'reunion'/exp OR reunion OR 'rwanda'/exp OR rwanda OR 'sao tome' OR 'senegal'/exp OR senegal OR 'seychelles'/exp OR seychelles OR 'sierra leone'/exp OR 'sierra leone' OR 'somalia'/exp OR somalia OR 'south africa'/exp OR 'south africa' OR 'st helena'/exp OR 'st helena' OR 'sudan'/exp OR sudan OR 'swaziland'/exp OR swaziland OR 'tanzania'/exp OR tanzania OR 'togo'/exp OR togo OR 'tunisia'/exp OR tunisia OR 'uganda'/exp OR uganda OR 'western sahara'/exp OR 'western sahara' OR 'zaire'/exp OR zaire OR 'zambia'/exp OR zambia OR 'zimbabwe'/exp OR zimbabwe OR 'central africa'/exp OR 'central africa' OR 'central african'/exp OR 'central african' OR 'west africa'/exp OR 'west africa' OR 'west african'/exp OR 'west african' OR 'western africa'/exp OR 'western africa' OR 'western african'/exp OR 'western african' OR 'east africa'/exp OR 'east africa' OR 'east african'/exp OR 'east african' OR 'eastern africa'/exp OR 'eastern african' OR 'north africa'/exp OR 'north africa' OR 'north african'/exp OR 'north african' OR 'northern africa'/exp OR 'northern africa' OR 'northern african'/exp OR 'northern african' OR 'south african'/exp OR 'south african' OR 'southern africa'/exp OR 'southern africa' OR 'southern african'/exp OR 'southern african' OR 'sub saharan africa'/exp OR 'sub saharan africa' OR 'sub saharan african'/exp OR 'sub saharan african' OR 'subsaharan africa'/exp OR 'subsaharan africa' OR 'subsaharan african' |
| #2     | 'depression'/exp OR depression OR 'depressive disorder'/exp OR 'depressive disorder' OR 'depressive symptom'/exp OR 'depressive symptom' OR 'depressive neuros*' OR 'depressive syndrome*'                                                                                                                                                                                                                                                                                                                                                                                                                                                                                                                                                                                                                                                                                                                                                                                                                                                                                                                                                                                                                                                                                                                                                                                                                                                                                                                                                                                                                                                                                                                                                                                                                                                                                                                                                                                                                                                                                                                                                                                                                                                                                                                                                                                                                                                                                                                                                                                                                                                                                                                                                                                                                                         |

|    |                                                                                                                                                                |
|----|----------------------------------------------------------------------------------------------------------------------------------------------------------------|
| #3 | 'hypertension'/exp OR hypertension OR 'high blood pressure'/exp OR 'high blood pressure' OR (high AND ('blood'/exp OR blood) AND ('pressure'/exp OR pressure)) |
| #4 | #1 AND #2 AND #3                                                                                                                                               |

Supplementary Table 2. Methodological quality of included studies

| <b>Author, Year</b>      | <b>Sampling method</b> | <b>Timing of data collection</b> | <b>Sample size adequate</b> | <b>Response rate</b> | <b>Same method of data collection for all participants</b> | <b>SUMMARY (Risk of bias)</b> |
|--------------------------|------------------------|----------------------------------|-----------------------------|----------------------|------------------------------------------------------------|-------------------------------|
| <b>Ademola, 2019</b>     | Convenience            | Prospectively                    | No                          | Not described        | Yes                                                        | Moderate                      |
| <b>Bhana, 2015</b>       | Convenience            | Prospectively                    | Yes                         | Not described        | Yes                                                        | Moderate                      |
| <b>Geldsetzer, 2019</b>  | Stratified Random      | Prospectively                    | Yes                         | Adequate             | Yes                                                        | Low                           |
| <b>Grimsrud, 2009</b>    | Stratified Multistage  | Prospectively                    | Yes                         | Not described        | Yes                                                        | Low                           |
| <b>Hamer, 2012</b>       | Convenience            | Prospectively                    | Yes                         | Not described        | Yes                                                        | Moderate                      |
| <b>Igwe, 2013</b>        | Convenience            | Prospectively                    | Yes                         | Not described        | Yes                                                        | Moderate                      |
| <b>Iloh, 2018</b>        | Convenience            | Prospectively                    | Yes                         | Not described        | Yes                                                        | Moderate                      |
| <b>Kretchy, 2014</b>     | Time-Location          | Prospectively                    | Yes                         | Not described        | Yes                                                        | Moderate                      |
| <b>Okunrinboye, 2019</b> | Systematic Random      | Prospectively                    | Yes                         | Not described        | Yes                                                        | Low                           |
| <b>Umer, 2019</b>        | Convenience            | Prospectively                    | No                          | Adequate             | Yes                                                        | Moderate                      |
| <b>Yaméogo, 2015</b>     | Convenience            | Prospectively                    | Yes                         | Not described        | Yes                                                        | Moderate                      |

Supplementary Figure 1. PRISMA flow diagram

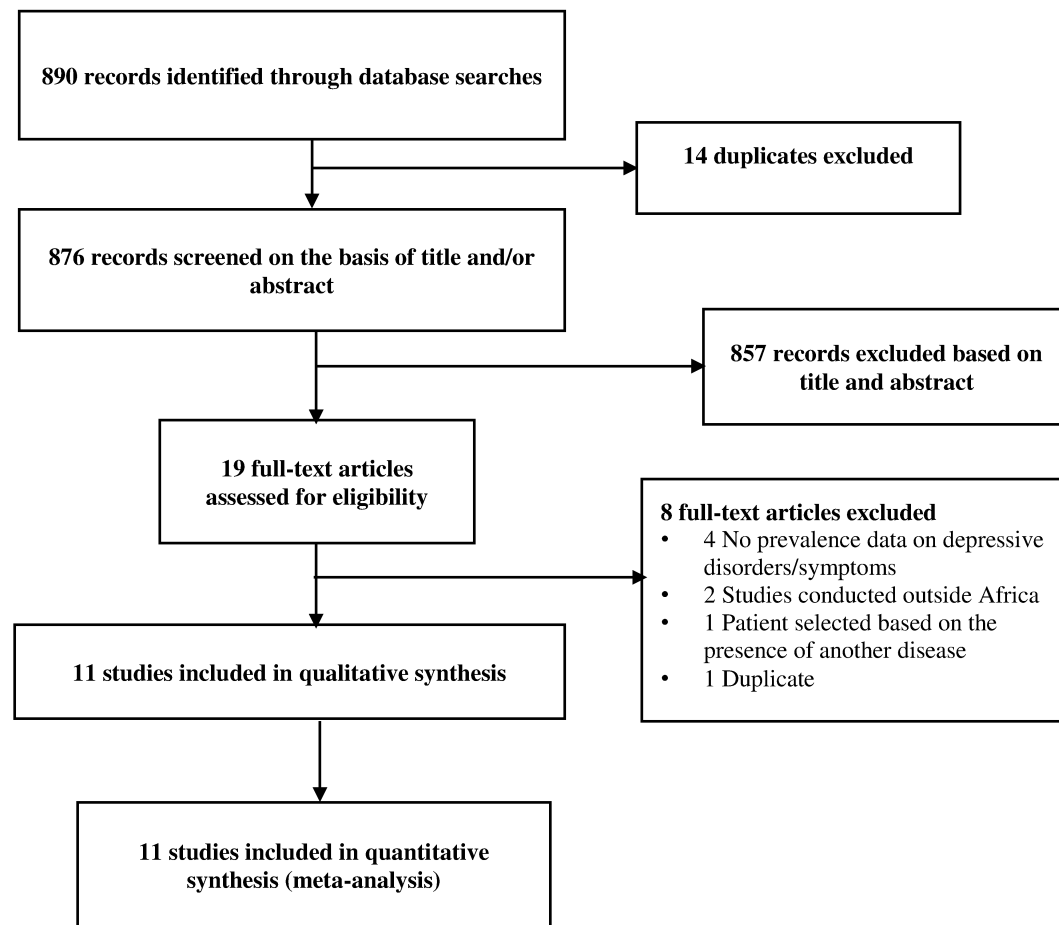

Supplementary Figure 2. Meta-analysis prevalence of depressive disorders by setting

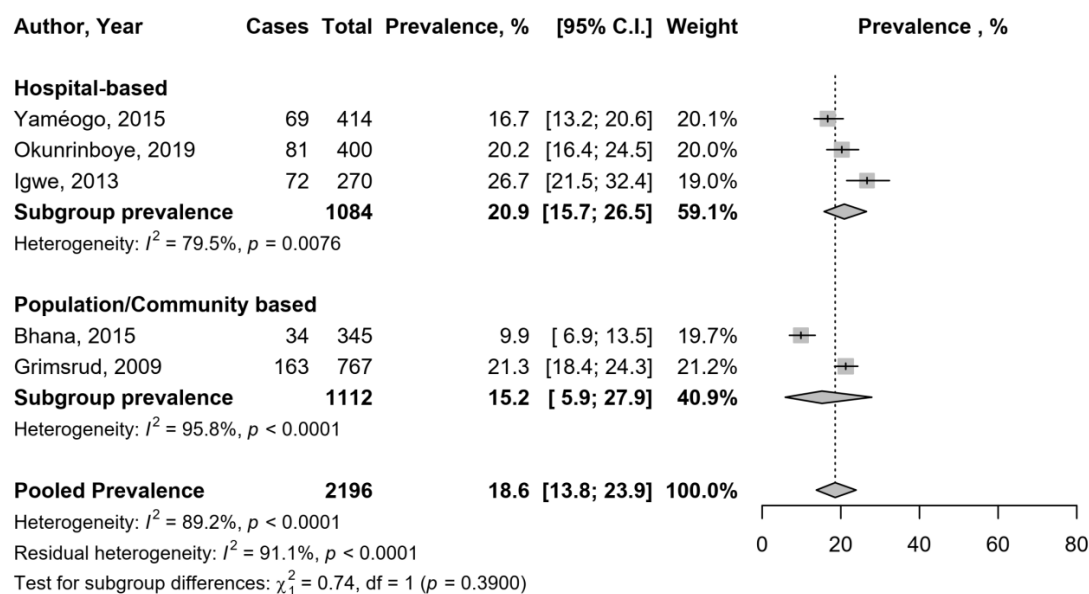

Supplementary Figure 3. Meta-analysis prevalence of depressive symptoms by setting

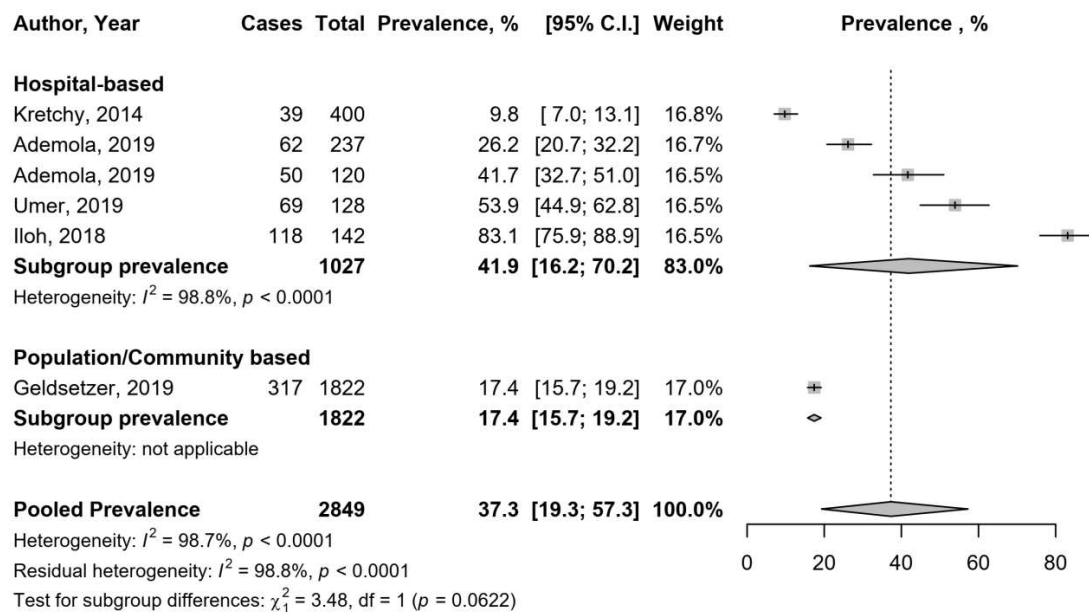

Supplementary Figure 4. Meta-analysis prevalence of major depressive disorders by setting

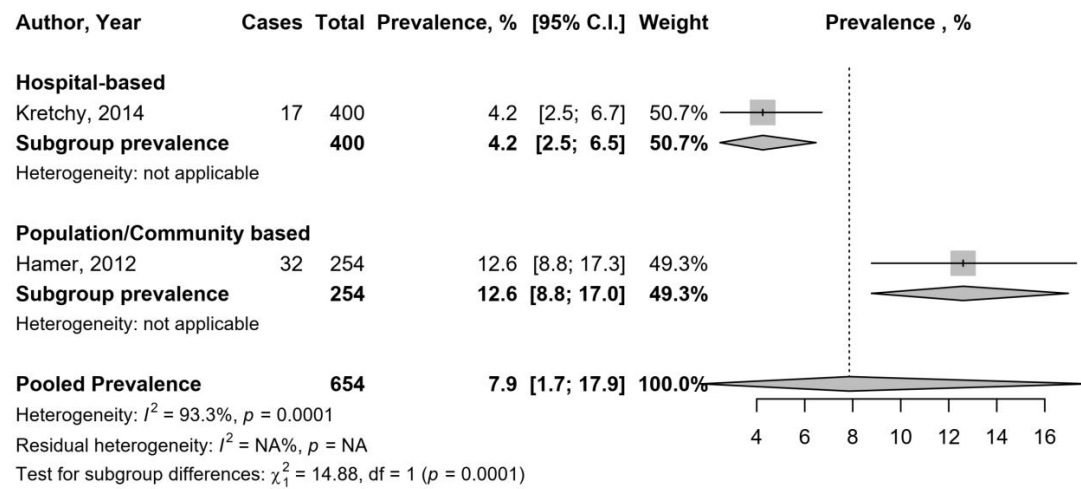

Supplementary Figure 5. Meta-analysis prevalence of depressive disorders by sex

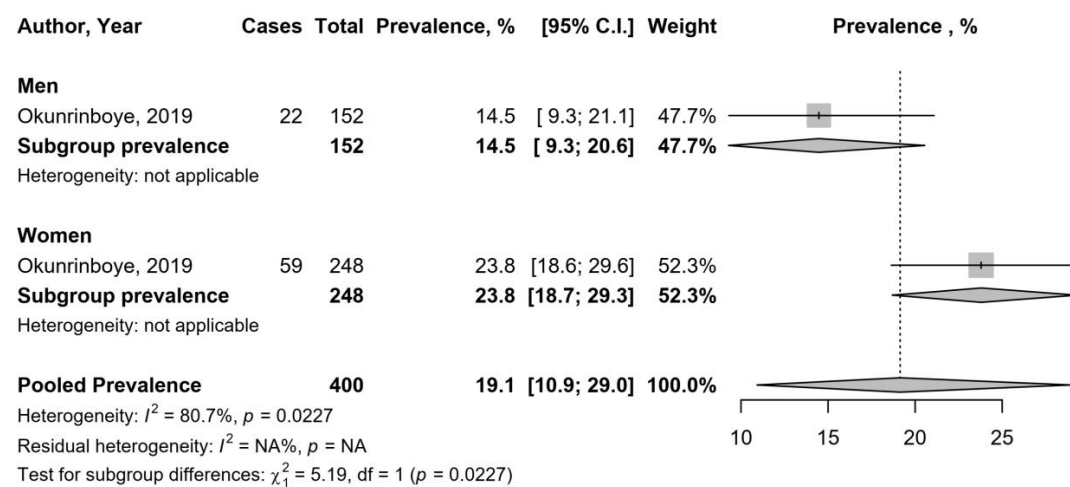

Supplementary Figure 6. Meta-analysis prevalence of depressive symptoms by sex

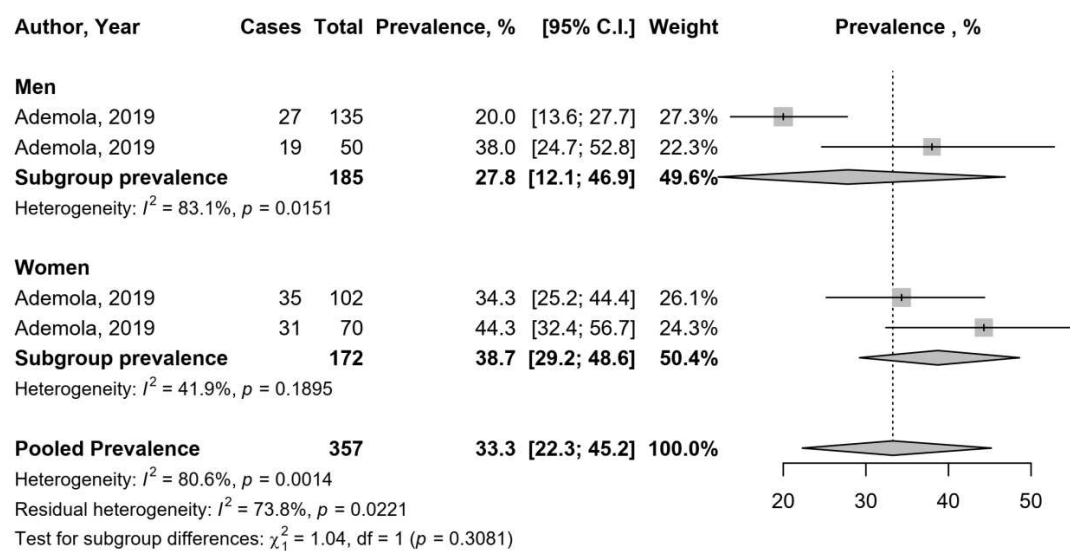

Supplement: bmjopen-2020-037975supp001.pdf [file bmjopen-2020-037975supp001.pdf]
