# Supplementary material for: Epidemiology of depressive disorders in people living with hypertension in Africa: a systematic review and meta-analysis
Source: PubMed Central journal article supplement — BMJ Open. 2020 Dec 10;10(12):e037975. doi: 10.1136/bmjopen-2020-037975 (PMC7733170; doi:10.1136/bmjopen-2020-037975), 2020-12-10
Supplement: bmjopen-2020-037975.draft_revisions.pdf [file bmjopen-2020-037975.draft_revisions.pdf]

# BMJ Open

BMJ Open is committed to open peer review. As part of this commitment we make the peer review history of every article we publish publicly available.

When an article is published we post the peer reviewers' comments and the authors' responses online. We also post the versions of the paper that were used during peer review. These are the versions that the peer review comments apply to.

The versions of the paper that follow are the versions that were submitted during the peer review process. They are not the versions of record or the final published versions. They should not be cited or distributed as the published version of this manuscript.

BMJ Open is an open access journal and the full, final, typeset and author-corrected version of record of the manuscript is available on our site with no access controls, subscription charges or pay-per-view fees (<http://bmjopen.bmj.com>).

If you have any questions on BMJ Open's open peer review process please email [info.bmjopen@bmj.com](mailto:info.bmjopen@bmj.com)

# BMJ Open

## Epidemiology of depressive disorders in people living with hypertension in Africa: a systematic review and meta-analysis

|                               |                                                                                                                                                                                                                                                                                                                                                                                                                     |
|-------------------------------|---------------------------------------------------------------------------------------------------------------------------------------------------------------------------------------------------------------------------------------------------------------------------------------------------------------------------------------------------------------------------------------------------------------------|
| Journal:                      | <i>BMJ Open</i>                                                                                                                                                                                                                                                                                                                                                                                                     |
| Manuscript ID                 | bmjopen-2020-037975                                                                                                                                                                                                                                                                                                                                                                                                 |
| Article Type:                 | Original research                                                                                                                                                                                                                                                                                                                                                                                                   |
| Date Submitted by the Author: | 23-Feb-2020                                                                                                                                                                                                                                                                                                                                                                                                         |
| Complete List of Authors:     | Endomba Angong, Francky Teddy; University of Yaoundé I, Department of Internal Medicine, Faculty of Medicine and Biomedical Sciences; University of Bourgogne, Psychiatry Internship Program Mazou, Temgoua Ngou ; University of Yaounde I, Department of Internal Medicine, Faculty of Medicine and Biomedical Sciences Bigna, Jean Joel; Centre Pasteur of Cameroon, Department of Epidemiology and Public Health |
| Keywords:                     | Depression & mood disorders < PSYCHIATRY, Hypertension < CARDIOLOGY, EPIDEMIOLOGY                                                                                                                                                                                                                                                                                                                                   |
|                               |                                                                                                                                                                                                                                                                                                                                                                                                                     |

SCHOLARONE™  
Manuscripts

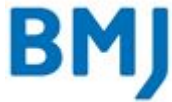

I, the Submitting Author has the right to grant and does grant on behalf of all authors of the Work (as defined in the below author licence), an exclusive licence and/or a non-exclusive licence for contributions from authors who are: i) UK Crown employees; ii) where BMJ has agreed a CC-BY licence shall apply, and/or iii) in accordance with the terms applicable for US Federal Government officers or employees acting as part of their official duties; on a worldwide, perpetual, irrevocable, royalty-free basis to BMJ Publishing Group Ltd ("BMJ") its licensees and where the relevant Journal is co-owned by BMJ to the co-owners of the Journal, to publish the Work in this journal and any other BMJ products and to exploit all rights, as set out in our [licence](#).

The Submitting Author accepts and understands that any supply made under these terms is made by BMJ to the Submitting Author unless you are acting as an employee on behalf of your employer or a postgraduate student of an affiliated institution which is paying any applicable article publishing charge ("APC") for Open Access articles. Where the Submitting Author wishes to make the Work available on an Open Access basis (and intends to pay the relevant APC), the terms of reuse of such Open Access shall be governed by a Creative Commons licence – details of these licences and which [Creative Commons](#) licence will apply to this Work are set out in our licence referred to above.

Other than as permitted in any relevant BMJ Author's Self Archiving Policies, I confirm this Work has not been accepted for publication elsewhere, is not being considered for publication elsewhere and does not duplicate material already published. I confirm all authors consent to publication of this Work and authorise the granting of this licence.

1  
2  
3 1 **Epidemiology of depressive disorders in people living with hypertension in**  
4  
5  
6 2 **Africa: a systematic review and meta-analysis**  
7  
8  
9 3

10  
11 4 Francky Teddy **Endomba**,<sup>1,2</sup> Mazou N. **Temgoua**,<sup>1</sup> Jean Joel **Bigna**<sup>3\*</sup>  
12  
13 5

- 14  
15 6 1. Department of Internal Medicine, Faculty of Medicine and Biomedical Sciences,  
16 7 University of Yaoundé I, Yaoundé, Cameroon  
17  
18 8 2. Psychiatry Internship Program, University of Bourgogne, 21000 Dijon, France.  
19  
20 9 3. Department of Epidemiology and Public Health, Centre Pasteur of Cameroon, Yaoundé,  
21 10 Cameroon  
22  
23 11

24  
25 12 E-mail addresses: FTE (franckytddyea@gmail.com); MNT (neurotemgoua@yahoo.fr); JJB  
26 13 (bignarimjj@yahoo.fr)  
27

28  
29  
30 14 \*Corresponding author  
31  
32 15

33  
34  
35 16 **Word count:** 2,070; Abstract: 283 words  
36  
37  
38  
39  
40  
41  
42  
43  
44  
45  
46  
47  
48  
49  
50  
51  
52  
53  
54  
55  
56  
57  
58  
59  
60

## 17 **Abstract**

18 **Objectives:** Better knowledge of epidemiology of depressive disorders in people living with  
19 hypertension can help to implement pertinent strategies to address its burden. The objective  
20 was to estimate the prevalence of depressive disorders and symptoms in people living with  
21 hypertension in Africa.

22 **Design:** Systematic review and meta-analysis.

23 **Population:** People living with hypertension in Africa.

24 **Data sources and synthesis:** PubMed, EMBASE, African Index Medicus, Africa Journal  
25 Online were searched up to January 31st, 2020; regardless of language of publication. Two  
26 independent investigators selected studies, extracted data, and assessed the methodological  
27 quality of included studies. Multivariate random-effects meta-analysis served to pool data  
28 taking in account the variability between diagnostic tools for identifying patients with  
29 depressive disorders or symptoms.

30 **Results:** We included 11 studies with 5,299 participants with hypertension. The mean age  
31 varied between 50.3 and 59.6 years. The proportion of males varied between 28% and 54%.  
32 Data were collected between 2002 and 2017. Four studies were conducted in South Africa,  
33 three studies in Nigeria, one in Ghana, one in both Ghana and Nigeria, one in Ethiopia, and  
34 one in Burkina-Faso. The adjusted prevalence of depressive disorders taking in account the  
35 variance between diagnostic tools was 17.9% (95% confidence interval [CI]: 13.0-23.4). The  
36 prevalence of depressive symptoms and major depressive symptoms was 33.3% (95%CI: 9.9-  
37 61.6) and 7.8% (95%CI: 3.0-14.5). There was heterogeneity attributable to the diagnostic  
38 tools for depressive disorders and symptoms. There was no publication bias.

39 **Limitation:** All regions of Africa were not represented weakening the generalizability of  
40 findings to the entire region.

1  
2  
3 41 **Conclusion:** Depressive disorders and symptoms are prevalent in people living with  
4  
5 42 hypertension in Africa, indicating that strategies from clinicians, researchers, and public  
6  
7 43 health makers are needed to reduce its burden in the region.  
8  
9

10 44

11  
12 45

13  
14 **Keywords**

15 46  
16  
17 47 Depression; Depressive symptoms; Depressive disorders; Hypertension; Africa  
18  
19  
20  
21  
22  
23  
24  
25  
26  
27  
28  
29  
30  
31  
32  
33  
34  
35  
36  
37  
38  
39  
40  
41  
42  
43  
44  
45  
46  
47  
48  
49  
50  
51  
52  
53  
54  
55  
56  
57  
58  
59  
60

## 48 **Strengths and Limitations of this study**

- 49 • Not all sub-regions of Africa were represented in this review
- 50 • This is the first review performed among people living with hypertension Africa to  
51 investigate the epidemiology of depressive disorders and symptoms.
- 52 • We found a huge heterogeneity between studies explained by the difference between  
53 diagnostic tools for depressive disorders.
- 54 • We were not able to explore all sources of heterogeneity due to scarcity of  
55 epidemiological data.

## 56 Introduction

57 Cardiovascular diseases (CVDs) are the leading killers worldwide with approximately 18  
58 million deaths per year,<sup>1</sup> and hypertension is involved in approximately 50% of CVDs.<sup>2-4</sup>  
59 According to the World Health Organization (WHO), the number of people living with  
60 hypertension worldwide is estimated at 1.13 billion, and the African region has the highest  
61 prevalence of hypertensive patients (27%).<sup>4</sup> Hypertension deleterious effects are linked to  
62 direct human consequences with increased morbidity and mortality but also harmful economic  
63 outcomes pertaining to its management and its invalidating complications.<sup>5-7</sup> Detrimental  
64 human outcomes related to chronic high blood pressure encompass target organ damage  
65 involving cerebrovascular, heart, and kidney diseases;<sup>4,5</sup> but also mental health repercussions  
66 notably anxiety, stress and depression.<sup>8-10</sup>

67 Depressive disorder is recognized to be the most common mental health illness and the  
68 second cause of disability worldwide,<sup>11,12</sup> after cardiovascular diseases. It accounts for 3% of  
69 global disability adjusted life years (DALYs).<sup>12</sup> According to the WHO, depressive disorder  
70 affects more than 300 million people (4.4% of the world population), and its prevalence in the  
71 African region is estimated at 9% (29.9 million of cases).<sup>13</sup> Some subpopulations have been  
72 identified as depression risk groups, including patients with chronic cardiometabolic  
73 conditions such as hypertension.<sup>9,14</sup> A wide range of previously published works have  
74 interested on the interaction between hypertension and depression.<sup>8,10,15,16</sup> Comprehensively,  
75 the majority of these studies concluded to the fact that hypertensive disease and depressive  
76 disorder share bidirectional interplay with patients with hypertension more likely to develop  
77 depression and inversely.<sup>8,17</sup> As examples of evidence, a meta-analysis of 41 studies  
78 (including 31 studies from China and three from Africa) which included 30,796 patients with  
79 hypertension found that 26.8% have depression,<sup>10</sup> and another one which included 22,367  
80 participants found that depression significantly increase the risk of hypertension incidence



1  
2  
3 81 with an adjusted relative risk of 1.42.<sup>15</sup> Additionally, it has been reported that hypertensive  
4  
5 82 patients with comorbid depression are more exposed to poor medication adherence with  
6  
7 83 uncontrolled blood pressure as well as chronic vascular complications and cardiovascular  
8  
9 84 disease related mortality.<sup>8,10,15,16,18</sup> The burden of the depression-hypertension co-occurrence  
10  
11 85 is worsened by the fact that approximately one hypertensive patients on ten have untreated  
12  
13 86 depression.<sup>10,19</sup>

14  
15  
16  
17 87 Considering up-to-date scientific literature, depression is frequent and harmful in hypertensive  
18  
19 88 patients in occidental settings,<sup>10,20</sup> hypertension and depression are commonly encountered  
20  
21 89 amongst African populations,<sup>2,4,13</sup> but data summarizing and focusing on the burden of  
22  
23 90 depression among hypertensive Africans are not yet available. Hence, we conducted this  
24  
25 91 systematic review and meta-analysis with the aim to determine the prevalence of depressive  
26  
27 92 disorders/symptoms in people living with hypertension in Africa.  
28  
29  
30  
31  
32

## 33 94 **Methods**

### 34 35 95 **Design**

36  
37  
38 96 This systematic review and meta-analysis was conducted according to the Joanna Briggs  
39  
40 97 Institute guidelines.<sup>21</sup> This study was reported according to the preferred reporting items for  
41  
42 98 systematic reviews and meta-analyses (PRISMA) guidelines.<sup>22</sup> The protocol of this review  
43  
44 99 was registered in PROSPERO.

### 45 46 47 100 **Eligibility criteria**

#### 48 49 101 ***Condition***

50  
51 102 We considered studies reporting the prevalence (or enough data to compute this estimate) of  
52  
53 103 depressive disorders and symptoms.

#### 54 55 104 ***Context***

1  
2  
3 105 We considered studies conducted in people living in Africa. Studies conducted in Africans  
4  
5 106 living outside Africa were not considered.  
6

### 7 107 ***Population***

8  
9 108 We considered studies conducted in people with diagnosed hypertension.  
10

### 11 109 ***Study design***

12  
13 110 Cross-sectional, case-control, and cohort studies.  
14

### 15 111 **Data sources**

16  
17 112 We searched PubMed, Excerpta Medica Database (EMBASE), Africa Index Medicus, and  
18  
19 113 Africa Journal Online to identify all relevant records published up to January 31<sup>st</sup>, 2020; with  
20  
21 114 any language restriction. The search strategy in EMBASE is available in the Appendix  
22  
23 115 (Supplementary Table 1). To supplement the bibliographic database searches and identify  
24  
25 116 potential additional data sources, we scrutinized the reference list of all relevant original and  
26  
27 117 review papers.  
28  
29  
30

### 31 118 **Study selection**

32  
33 119 Titles and abstracts of articles retrieved from literature search were independently screened by  
34  
35 120 two investigators (FTE and JJB), and the full-texts of those potentially eligible were obtained  
36  
37 121 and further assessed for final inclusion. Disagreements were resolved through consensus.  
38  
39

### 40 122 **Data collection and management**

41  
42 123 A preconceived and standardized data extraction form was used to collect information on first  
43  
44 124 author's name, study country, year of publication, period of participants' recruitment, study  
45  
46 125 design, setting, sampling method, timing of data collection, response rate, mean or median  
47  
48 126 age of the population, age range, proportion of males, number of participants with  
49  
50 127 hypertension, the number of participants with depressive disorders. In case of multinational  
51  
52 128 studies, data were separated to show the estimate within individual countries. Two  
53  
54  
55  
56  
57  
58  
59  
60

1  
2  
3 129 investigators (FTE and JJB) independently extracted the data from individual studies, with  
4  
5 130 disagreements being resolved through consensus.  
6

7  
8 131 Two investigators (FTE and JJB) independently assessed study methodological quality of  
9  
10 132 included studies with tool developed by Joanna Briggs Institute,<sup>21</sup> with disagreements being  
11  
12 133 resolved through discussion and consensus.  
13

#### 14 134 **Data synthesis and analysis**

15  
16  
17 135 Meta-analyses were performed with the *meta*, *metafor*, and *dmetar* packages of the statistical  
18  
19 136 software *R* (version 3.6.2). Prevalence estimates were reported with 95% confidence interval  
20  
21 137 (95%CI). Prevalence pooling was done with Freeman-Tukey double arcsine transformation  
22  
23 138 using random-effects meta-analysis model.<sup>23</sup> We adjusted the prevalence in a multivariate  
24  
25 139 meta-analysis to take in account the variance between tools used to identify patients with  
26  
27 140 depressive disorders/symptoms. Egger's test served for detecting the presence of publication  
28  
29 141 bias.<sup>24</sup> A p-value < 0.10 on Egger test was considered indicative of statistically significant  
30  
31 142 publication bias. Heterogeneity was evaluated by the  $\chi^2$  test on Cochran's Q statistic,<sup>25</sup> which  
32  
33 143 was quantified by  $I^2$  values. The  $I^2$  statistic estimates the percentage of total variation across  
34  
35 144 studies due to true between-study differences rather than chance. In general,  $I^2$  values greater  
36  
37 145 than 60-70% indicate the presence of substantial heterogeneity.<sup>26</sup> Inter-rater agreements  
38  
39 146 between investigators for study inclusion and methodological quality assessment were  
40  
41 147 assessed using Kappa Cohen's coefficient.<sup>27</sup>  
42  
43  
44  
45

#### 46 148 **Patient and public involvement**

47  
48  
49 149 Patients or the public were not involved in the design, conduct, reporting, or dissemination of  
50  
51 150 our research.  
52

53  
54 151

## 55 56 152 **Results**

### 57 58 153 **The review process and study characteristics** 59 60

1  
2  
3 154 We initially identified 890 records and finally retained 11 full texts (13 prevalence data) in the  
4  
5 155 meta-analysis (Supplementary Figure 1).<sup>28-38</sup> Agreement between investigators on selection  
6  
7 156 based on title and abstract was  $\kappa = 0.88$  and  $\kappa = 1.0$  for final inclusion.  
8  
9

10 157 Of the 11 included studies, eight studies used probabilistic sampling while three used non-  
11  
12 158 probabilistic sampling. All studies prospectively collected and analysed data and used the  
13  
14 159 same method to identify patients with depressive disorders. Sample size was adequate in nine  
15  
16 160 studies and response rate in two studies (Supplementary Table 2).  
17  
18

19 161 The characteristics of included studies are presented in the Table 1. All studies were cross-  
20  
21 162 sectional (Table 1). Patient Health Questionnaire-9 was the most used tool,  $n = 4$ . The mean  
22  
23 163 age varied between 50.3 and 59.6 years. The proportion of males varied between 28% and  
24  
25 164 54%. Data on depressive disorders/symptoms were collected between 2002 and 2017. Four  
26  
27 165 studies were conducted in South Africa, three studies in Nigeria, one study in Ghana, one  
28  
29 166 study in both Ghana and Nigeria, one study in Ethiopia, and one study in Burkina-Faso. None  
30  
31 167 of the study was conducted in Central Africa and North Africa.  
32  
33  
34

### 35 168 **Prevalence of depressive disorders/symptoms in people with hypertension in Africa**

36  
37 169 In total, 5,299 participants with hypertension were included. There was substantial  
38  
39 170 heterogeneity for all analyses, all  $I^2 > 75\%$  (Figure 1). The prevalence of depressive disorders  
40  
41 171 was 18.6% (95%CI: 13.8-23.9; 5 studies) (Figure 1). The adjusted prevalence taking in  
42  
43 172 account the variance between diagnostic tools was 17.9% (95%CI: 13.0-23.4) with 52.7% of  
44  
45 173 variance due to difference between tools. There was no publication bias ( $p = 0.789$ ). There  
46  
47 174 was no data on major depressive disorders.  
48  
49

50  
51 175 The prevalence of depressive symptoms was 37.3% (95%CI: 19.3-57.3; 6 studies). The  
52  
53 176 adjusted prevalence taking in account the variance between diagnostic tools was 33.3%  
54  
55 177 (95%CI: 9.9-61.6) with 74.1% of variance due to difference between tools. There was no  
56  
57 178 publication bias ( $p = 0.115$ ).  
58  
59  
60

1  
2  
3 179 The prevalence of major depressive symptoms was 7.9% (95%CI: 1.7-17.9; 2 studies). The  
4  
5 180 adjusted prevalence taking in account the variance between diagnostic tools was 7.8%  
6  
7 181 (95%CI: 3.0-14.5) with 43.3% of variance due to difference between tools. The p value on  
8  
9 182 Egger test was 0.789.  
10  
11

12 183

## 15 184 **Discussion**

17 185 This meta-analysis of data from 5,299 people with hypertension living in five countries in  
18 186 Africa revealed that depressive disorders and symptoms are prevalent in this population with  
19  
20 187 substantial heterogeneity according to the diagnostic tools. The present systematic review  
21  
22 188 suggests that approximately one on five and one-third of patients with hypertension have  
23  
24 189 respectively depression and depressive symptoms.  
25  
26

27  
28  
29 190 Globally, there are dissimilarities between our findings and the one of previous studies on  
30  
31 191 depression among hypertensive patients. For instance, compared to our findings, a meta-  
32  
33 192 analysis on the prevalence of depression in patients with hypertension and which included 41  
34  
35 193 studies (most of them from China) found higher rates of depression with a summarized  
36  
37 194 prevalence of 26.9% (95%CI: 21.7% - 32.3%).<sup>10</sup> The same meta-analysis found that 28.5%  
38  
39 195 (95% CI: 22.2% - 35.3%) of Chinese patients with hypertension had depression.<sup>10</sup> Our review  
40  
41 196 revealed more cases of depression among patients with hypertension compared to occidental  
42  
43 197 studies. For example, considering data of United States Multi-Disciplinary Group Practice  
44  
45 198 Observational Study which included 4,362 adult patients with hypertension (13% of anxiety  
46  
47 199 and/or depression), our study's prevalence of depressive disorder is higher.<sup>39</sup> Also, a cross-  
48  
49 200 sectional study done in Spain among 5,954 hypertensive patients with high cardiovascular risk  
50  
51 201 profile found that 15.6% had depression, of which 61.4% were untreated.<sup>19</sup> This variability in  
52  
53 202 results can be explained by the changeability pertaining to the criteria and/or diagnostic tools  
54  
55 203 used to screen depressive disorder across studies' populations.<sup>40,41</sup> Noteworthy, Li and  
56  
57  
58  
59  
60

1  
2  
3 204 colleagues who studied depressive disorder among hypertension in a meta-analysis of 41  
4  
5 205 studies suggested that self-assessed screening tools of depression or depressive symptoms  
6  
7 206 might overestimate the prevalence of depression.<sup>10</sup> Indeed they found a 30% depression  
8  
9 207 prevalence using self-administrated diagnostic scales versus a 21% prevalence using clinical-  
10  
11 208 interviewed tools.<sup>10</sup> This could be link to patients' confusion about depression and  
12  
13 209 hypertension symptoms such as poor appetite, fatigue and sleep disturbances.<sup>10</sup>In our review  
14  
15 210 the most used diagnostic tool was the PHQ-9 and another fact to highpoint is that differences  
16  
17 211 in prevalence can also be explained by the cut-off-point used for a same tool to define a  
18  
19 212 positive screening for depression.<sup>29,42,43</sup> Mahmood and colleagues while assessing depression  
20  
21 213 among 411 hypertensive outpatients in a Pakistan hospital by using PHQ-9 with a score of 10  
22  
23 214 or above as cut-off point found a prevalence of 40.1%,<sup>44</sup> more than two folds ours. In our  
24  
25 215 study we had a substantial heterogeneity for all analyses which can also be related to the  
26  
27 216 variance between diagnostic tools used for depression assessment. The previously cited meta-  
28  
29 217 analysis of Li and colleagues also showed evidence of high-level heterogeneity.<sup>10</sup>  
30  
31 218 This meta-analysis highlights the fact that depressive disorder is frequently encountered  
32  
33 219 among hypertensive patients. This review might substantiate the relevancy to conduct further  
34  
35 220 studies with the aim to investigate on the better diagnosis tool for depression among  
36  
37 221 hypertensive patients in order to reduce heterogeneity of results. Moreover, our review could  
38  
39 222 justify carrying out epidemiological studies on the depression-hypertension comorbidity in  
40  
41 223 other African regions in order to have more representative regional picture of the evidence.  
42  
43 224 All this might help to establish adapted policies pertaining to the management of hypertensive  
44  
45 225 patients with depression, notably for a tailored pharmacological treatment.<sup>18,45,46</sup> Nevertheless,  
46  
47 226 our analysis could already draw clinician's awareness on the necessity to assess depression  
48  
49 227 symptoms among hypertensive patients, especially since previously published works found  
50  
51 228 that comorbid depression contribute to more deleterious cardiovascular outcomes.<sup>8,10,15,16,18</sup>  
52  
53  
54  
55  
56  
57  
58  
59  
60

1  
2  
3 229 This study should however be interpreted considering some limitations. First and most  
4  
5 230 common to meta-analyses of prevalence studies,<sup>47</sup> we found a huge heterogeneity between  
6  
7 231 studies for which we undertook adjusted analysis to take account the variance due to  
8  
9 232 diagnostic tools. However, some characteristics that may further explain heterogeneity were  
10  
11 233 not reported or there was no enough study to conduct such analysis including sex, sub-  
12  
13 234 regions, and age groups. Second, the various geographic regions and countries were variably  
14  
15 235 represented and some countries were represented. This may weaken the generalizability of our  
16  
17 236 findings and call for more epidemiological studies in this region.

18  
19 237 Despite these limitations, this first systematic review and meta-analysis on depressive  
20  
21 238 disorders/symptoms in people living with hypertension in Africa provided a clear summary of  
22  
23 239 the existing knowledge. A protocol had been registered before, and we used rigorous  
24  
25 240 methodological and statistical procedures to obtain and pool data. Furthermore, we have taken  
26  
27 241 in account the variability due to diagnostic tools. There was no publication bias.

28  
29  
30  
31  
32  
33 242

### 34 35 243 **Conclusions**

36  
37 244 Overall, our review found that depression is prevalent among patients with hypertension. This  
38  
39 245 may have significant implications for routine clinical practice while treating and following  
40  
41 246 hypertensive patients. However, since our analysis has limitations pertaining to diagnostic  
42  
43 247 tools consistency within studies and also to the unrepresentative geographic distribution,  
44  
45 248 further studies would be relevant in order to reinforce our findings. All this could be a support  
46  
47 249 for a personalized management of patients with hypertension and depression.

48  
49  
50  
51  
52 250

### 53 54 251 **Author Contributors**

55  
56 252 Conception: JJB, FTE. Designing of the protocol: FTE, JJB. Literature search: JJB. Studies  
57  
58 253 selection: FTE, JJB. Data extraction: FTE, JJB. Data management: JJB. Data synthesis and  
59  
60

1  
2  
3 254 analysis: JJB. Writing of the first draft: JJB, FTE. Critical revision: FTE, MNT, JJB.  
4  
5 255 Approved the final version: FTE, MNT, JJB. Guarantor of the review: JJB.  
6  
7

## 8 256 **Acknowledgments**

9  
10 257 None.

## 11 12 258 **Funding**

13  
14 259 This research received no specific grant from any funding agency in the public, commercial or  
15  
16 260 not-for-profit sectors.

## 17 18 19 261 **Competing interests**

20  
21 262 We declare no competing interests.

## 22 23 24 263 **Patient consent**

25  
26 264 Not applicable.

## 27 28 265 **Data sharing statement**

29  
30 266 All data generated for this study are in the manuscript and its supporting files.  
31  
32

33 267

## 34 35 268 **References**

- 36  
37  
38  
39 269 1. GBD 2015 Risk Factors Collaborators. Global, regional, and national comparative risk  
40 270 assessment of 79 behavioural, environmental and occupational, and metabolic risks or  
41 271 clusters of risks, 1990-2015: a systematic analysis for the Global Burden of Disease Study  
42 272 2015. *Lancet Lond Engl.* 2016;388(10053):1659-724.
- 43  
44 273 2. Kearney PM, Whelton M, Reynolds K, Muntner P, Whelton PK, He J. Global burden of  
45 274 hypertension: analysis of worldwide data. *Lancet Lond Engl.* 2005;365(9455):217-23.
- 46  
47 275 3. Lawes CMM, Vander Hoorn S, Rodgers A, International Society of Hypertension. Global  
48 276 burden of blood-pressure-related disease, 2001. *Lancet Lond Engl.*  
49 277 2008;371(9623):1513-8.
- 50  
51 278 4. World Health Organization (WHO). Hypertension. [https://www.who.int/news-room/fact-](https://www.who.int/news-room/fact-sheets/detail/hypertension)  
52 279 [sheets/detail/hypertension](https://www.who.int/news-room/fact-sheets/detail/hypertension). Date: 2019. Date accessed: February 16, 2019.
- 53  
54  
55 280 5. Zhou B, Danaei G, Stevens GA, Bixby H, Taddei C, Carrillo-Larco RM, et al. Long-term  
56 281 and recent trends in hypertension awareness, treatment, and control in 12 high-income  
57 282 countries: an analysis of 123 nationally representative surveys. *The Lancet.*  
58 283 2019;394(10199):639-51.  
59  
60



- 1  
2  
3 284 6. Arima H, Barzi F, Chalmers J. Mortality patterns in hypertension. *J Hypertens.* 2011;29  
4 285 Suppl 1:S3-7.
- 5  
6 286 7. Zhang D, Wang G, Zhang P, Fang J, Ayala C. Medical Expenditures Associated With  
7 287 Hypertension in the U.S., 2000–2013. *Am J Prev Med.* 2017;53(6 Suppl 2):S164-71.
- 8  
9 288 8. Scalco AZ, Scalco MZ, Azul JBS, Lotufo Neto F. Hypertension and depression. *Clin Sao*  
10 289 *Paulo Braz.* 2005;60(3):241-50.
- 11  
12  
13 290 9. Ngo VK, Rubinstein A, Ganju V, Kanellis P, Loza N, Rabadan-Diehl C, et al. Grand  
14 291 Challenges: Integrating Mental Health Care into the Non-Communicable Disease Agenda.  
15 292 *PLOS Med.* 2013;10(5):e1001443.
- 16  
17 293 10. Li Z, Li Y, Chen L, Chen P, Hu Y. Prevalence of Depression in Patients With  
18 294 Hypertension. *Medicine (Baltimore).* 2015;94(31):e1317.
- 19  
20 295 11. Rehm J, Shield KD. Global Burden of Disease and the Impact of Mental and Addictive  
21 296 Disorders. *Curr Psychiatry Rep.* 2019;21(2):10.
- 22  
23  
24 297 12. Ferrari AJ, Charlson FJ, Norman RE, Patten SB, Freedman G, Murray CJL, et al. Burden  
25 298 of depressive disorders by country, sex, age, and year: findings from the global burden of  
26 299 disease study 2010. *PLoS Med.* 2013;10(11):e1001547.
- 27  
28 300 13. World Health Organization. Depression and Other Common Mental Disorders. Geneva:  
29 301 World Health Organization; 2017.
- 30  
31  
32 302 14. Schaakxs R, Comijs HC, van der Mast RC, Schoevers RA, Beekman ATF, Penninx  
33 303 BWJH. Risk Factors for Depression: Differential Across Age? *Am J Geriatr Psychiatry.*  
34 304 2017;25(9):966-77.
- 35  
36 305 15. Meng L, Chen D, Yang Y, Zheng Y, Hui R. Depression increases the risk of hypertension  
37 306 incidence: a meta-analysis of prospective cohort studies. *J Hypertens.* 2012;30(5):842-51.
- 38  
39 307 16. Song X, Zhang Z, Zhang R, Wang M, Lin D, Li T, et al. Predictive markers of depression  
40 308 in hypertension. *Medicine (Baltimore).* 2018;97(32):e11768.
- 41  
42  
43 309 17. Sandström YK, Ljunggren G, Wändell P, Wahlström L, Carlsson AC. Psychiatric  
44 310 comorbidities in patients with hypertension--a study of registered diagnoses 2009-2013 in  
45 311 the total population in Stockholm County, Sweden. *J Hypertens.* 2016;34(3):414-20;  
46 312 discussion 420.
- 47  
48 313 18. Graham N, Ward J, Mackay D, Pell JP, Cavanagh J, Padmanabhan S, et al. Impact of  
49 314 major depression on cardiovascular outcomes for individuals with hypertension:  
50 315 prospective survival analysis in UK Biobank. *BMJ Open.* 2019;9:e024433.
- 51  
52  
53 316 19. Mejia-Lancheros C, Estruch R, Martínez-González MA, Salas-Salvadó J, Corella D,  
54 317 Gómez-Gracia E, et al. Blood pressure values and depression in hypertensive individuals  
55 318 at high cardiovascular risk. *BMC Cardiovasc Disord.* 2014;14(1):109.
- 56  
57 319 20. Xue J, Chen S, Bogner HR, Tang W, Li L, Conwell Y. The prevalence of depressive  
58 320 symptoms among older patients with hypertension in rural China. *Int J Geriatr*  
59 321 *Psychiatry.* 2017;32(12):1411-7.

- 1  
2  
3 322 21. Munn Z, Moola S, Lisy K, et al. Chapter 5: Systematic reviews of prevalence and  
4 323 incidence. In: Aromataris E, Munn Z, eds. Joanna Briggs Institute Reviewer's Manual:  
5 324 The Joanna Briggs Institute 2017.
- 7 325 22. Liberati A, Altman DG, Tetzlaff J, et al. The PRISMA statement for reporting systematic  
8 326 reviews and meta-analyses of studies that evaluate healthcare interventions:  
9 327 explanation and elaboration. *BMJ* 2009;339:b2700-b00. doi: 10.1136/bmj.b2700
- 12 328 23. Barendregt JJ, Doi SA, Lee YY, et al. Meta-analysis of prevalence. *Journal of*  
13 329 *epidemiology and community health* 2013;67(11):974-8. doi: 10.1136/jech-2013-  
14 330 203104 [published Online First: 2013/08/22]
- 16 331 24. Egger M, Davey Smith G, Schneider M, et al. Bias in meta-analysis detected by a simple,  
17 332 graphical test. *BMJ (Clinical research ed)* 1997;315(7109):629-34. [published Online  
18 333 First: 1997/10/06]
- 21 334 25. Cochran WG. The Combination of Estimates from Different Experiments. *Biometrics*  
22 335 1954;10(1):101-29.
- 24 336 26. Higgins JP, Thompson SG. Quantifying heterogeneity in a meta-analysis. *Statistics in*  
25 337 *medicine* 2002;21(11):1539-58. doi: 10.1002/sim.1186 [published Online First:  
26 338 2002/07/12]
- 28 339 27. Viera AJ, Garrett JM. Understanding interobserver agreement: the kappa statistic. *Family*  
29 340 *medicine* 2005;37(5):360-3. [published Online First: 2005/05/11]
- 32 341 28. Igwe MN, Uwakwe R, Ahanotu CA, et al. Factors associated with depression and suicide  
33 342 among patients with diabetes mellitus and essential hypertension in a Nigerian  
34 343 teaching hospital. *African Health Sciences* 2013;13(1):68-77. doi:  
35 344 10.4314/ahs.v13i1.10
- 37 345 29. Bhana A, Rathod SD, Selohilwe O, et al. The validity of the Patient Health Questionnaire  
38 346 for screening depression in chronic care patients in primary health care in South  
39 347 Africa. *BMC Psychiatry* 2015;15(1) doi: 10.1186/s12888-015-0503-0
- 42 348 30. Umer H, Negash A, Birkie M, et al. Determinates of depressive disorder among adult  
43 349 patients with cardiovascular disease at outpatient cardiac clinic Jimma University  
44 350 Teaching Hospital, South West Ethiopia: Cross-sectional study. *International Journal*  
45 351 *of Mental Health Systems* 2019;13(1) doi: 10.1186/s13033-019-0269-8
- 47 352 31. Kretchy IA, Owusu-Daaku FT, Danquah SA. Mental health in hypertension: Assessing  
48 353 symptoms of anxiety, depression and stress on anti-hypertensive medication  
49 354 adherence. *International Journal of Mental Health Systems* 2014;8(1) doi:  
50 355 10.1186/1752-4458-8-25
- 53 356 32. Hamer M, Frasura-Smith N, Lespérance F, et al. Depressive symptoms and 24-hour  
54 357 ambulatory blood pressure in Africans: The SABPA study. *International Journal of*  
55 358 *Hypertension* 2012;2012 doi: 10.1155/2012/426803
- 57 359 33. Geldsetzer P, Vaikath M, Wagner R, et al. Depressive Symptoms and Their Relation to  
58 360 Age and Chronic Diseases Among Middle-Aged and Older Adults in Rural South
- 60

- 1  
2  
3 361 Africa. *The journals of gerontology Series A, Biological sciences and medical sciences*  
4 362 2019;74(6):957-63. doi: 10.1093/gerona/gly145  
5  
6 363 34. Ademola AD, Boima V, Odusola AO, et al. Prevalence and determinants of depression  
7 364 among patients with hypertension: A cross-sectional comparison study in Ghana and  
8 365 Nigeria. *Nigerian journal of clinical practice* 2019;22(4):558-65. doi:  
9 366 10.4103/njcp.njcp\_351\_18  
10  
11 367 35. Iloh GUP, Aguocha GU, Amadi AN, et al. Depression among ambulatory adult patients in  
12 368 a primary care clinic in southeastern Nigeria. *The Nigerian postgraduate medical*  
13 369 *journal* 2018;25(4):204-12. doi: 10.4103/npmj.npmj\_107\_18  
14  
15 370 36. Okunrinboye HI, Otakpor AN, Ilesanmi OS. Depression and medication-adherence in  
16 371 patients with hypertension attending a tertiary health facility in South-West Nigeria.  
17 372 *Pan African Medical Journal* 2019;33 doi: 10.11604/pamj.2019.33.27.12941  
18  
19 373 37. Grimsrud A, Stein DJ, Seedat S, et al. The association between hypertension and  
20 374 depression and anxiety disorders: Results from a nationally-representative sample of  
21 375 South African adults. *PLoS ONE* 2009;4(5) doi: 10.1371/journal.pone.0005552  
22  
23 376 38. Yaméogo NV, Samadoulougou A, Kagambèga LJ, et al. Sleep disorders, anxiety and  
24 377 depressive symptoms and cardiovascular risk among hypertensive black Africans:  
25 378 Cross-sectional study of 414 hypertensive followed as outpatients at the Central  
26 379 University Hospital of Ouagadougou (Burkina Faso). *Pan African Medical Journal*  
27 380 2015;21:185-96. doi: 10.11604/pamj.2015.21.115.5219  
28  
29 381 39. Ho AK, Thorpe CT, Pandhi N, Palta M, Smith MA, Johnson HM. Association of anxiety  
30 382 and depression with hypertension control: a US multidisciplinary group practice  
31 383 observational study. *J Hypertens.* 2015;33(11):2215-22.  
32  
33 384 40. Levis B, Yan XW, He C, Sun Y, Benedetti A, Thombs BD. Comparison of depression  
34 385 prevalence estimates in meta-analyses based on screening tools and rating scales versus  
35 386 diagnostic interviews: a meta-research review. *BMC Med.* 2019;17:65.  
36  
37 387 41. de Joode JW, van Dijk SEM, Walburg FS, Bosmans JE, van Marwijk HWJ, de Boer MR,  
38 388 et al. Diagnostic accuracy of depression questionnaires in adult patients with diabetes: A  
39 389 systematic review and meta-analysis. *PLoS ONE.* 2019;14(6):e0218512.  
40  
41 390 42. Manea L, Gilbody S, McMillan D. Optimal cut-off score for diagnosing depression with  
42 391 the Patient Health Questionnaire (PHQ-9): a meta-analysis. *CMAJ Can Med Assoc J.*  
43 392 2012;184(3):E191-6.  
44  
45 393 43. Levis B, Benedetti A, Thombs BD. Accuracy of Patient Health Questionnaire-9 (PHQ-9)  
46 394 for screening to detect major depression: individual participant data meta-analysis. *BMJ.*  
47 395 2019;365:l1476.  
48  
49 396 44. Mahmood S, Hassan SZ, Tabraze M, Khan MO, Javed I, Ahmed A, et al. Prevalence and  
50 397 Predictors of Depression Amongst Hypertensive Individuals in Karachi, Pakistan. *Cureus.*  
51 398 2017;9(6):e1397.  
52  
53  
54  
55  
56  
57  
58  
59  
60

- 1  
2  
3 399 45. Peixoto MF, Cesaretti M, Hood SD, Tavares A. Effects of SSRI medication on heart rate  
4 400 and blood pressure in individuals with hypertension and depression. *Clin Exp Hypertens*  
5 401 *NYN 1993*. 2019;41(5):428-33.  
6  
7 402 46. Offidani E, Benasi G, Charlson ME, Ravenell JE, Boutin-Foster C. Impact of Depression  
8 403 and Demoralization on Blood Pressure Control in African Americans with Hypertension:  
9 404 Findings from the TRIUMPH Trial. *J Racial Ethn Health Disparities*. 2018;5(5):913-8.  
10  
11 405 47. Bigna JJ, Nansseu JR, Kaze AD, et al. The Authors Respond. *Epidemiology*  
12 406 2018;29(6):e58-e59. doi: 10.1097/ede.0000000000000882 [published Online First:  
13 407 2018/06/19].  
14  
15  
16 408  
17 409

For peer review only

1  
2  
3  
4  
5  
6  
7  
8  
9  
10  
11  
12  
13  
14  
15  
16  
17  
18  
19  
20  
21  
22  
23  
24  
25  
26  
27  
28  
29  
30  
31  
32  
33  
34  
35  
36  
37  
38  
39  
40  
41  
42  
43  
44  
45  
46  
47  
48  
49  
50  
51  
52  
53  
54  
55  
56  
57  
58  
59  
60

410 **Figures legend**

411 Figure 1. Crude prevalence of depressive disorders/symptoms in people living with  
412 hypertension in Africa

For peer review only

413 **Table 1. Characteristics of included studies**

| Author             | Year | Setting    | Diagnosis of conditions                                                  | Inclusion criteria                                                                                                                                                                                                        | Population                       | Period of inclusion | Country           | Sample |
|--------------------|------|------------|--------------------------------------------------------------------------|---------------------------------------------------------------------------------------------------------------------------------------------------------------------------------------------------------------------------|----------------------------------|---------------------|-------------------|--------|
| <b>Ademola</b>     | 2019 | Hospital   | Patient Health Questionnaire 9 (PHQ-9)                                   | Age $\geq$ 18 y, diagnosis of hypertension, treatment with an antihypertensive medication for at least 12 months                                                                                                          | %Males: 41.7;<br>Mean age: 57    | 2013                | Ghana,<br>Nigeria | 357    |
| <b>Bhana</b>       | 2015 | Population | Depression module of the Structured Clinical Interview for DSM-IV (SCID) | Age $\geq$ 18 y, clinic attendance for routine chronic disease services (e.g., HIV, hypertension, diabetes) and ability to comprehend and complete study components in Tswana or English.                                 | NR                               | 2014                | South Africa      | 345    |
| <b>Geldsetzer</b>  | 2019 | Population | Center for Epidemiological Studies—Depression (CES-D) screening tool     | Age $\geq$ 40 y and continuously living in the area during the 12 months prior to study enrollment                                                                                                                        | %Males: 37.4                     | 2014-2015           | South Africa      | 1822   |
| <b>Grimsrud</b>    | 2009 | Population | Composite International Diagnostic Interview Version 3.0 (CIDI-3.0)      | South Africans $\geq$ 18 years who lived in households and hostels during the field period of the study                                                                                                                   | %Males: 28;<br>Mean age: 50.3    | 2002-2004           | South Africa      | 767    |
| <b>Hamer</b>       | 2012 | Population | Patient Health Questionnaire 9 (PHQ-9)                                   | Age: 25-60 y with hypertension                                                                                                                                                                                            | NR                               | 2008-2009           | South Africa      | 254    |
| <b>Igwe</b>        | 2013 | Hospital   | Mini International Neuro-psychiatric Interview (MINI)                    | Age: 18 - 64 years. Hypertension for at least 1 year and stable without need for hospital admission for 3 months prior to assessment                                                                                      | %Males: 53.7;<br>Mean year: 50.4 | 2010-2011           | Nigeria           | 270    |
| <b>Iloh</b>        | 2018 | Hospital   | Patient Health Questionnaire 9 (PHQ-9)                                   | Age $\geq$ 18 years with hypertension                                                                                                                                                                                     | %Males: 40.7                     | 2017                | Nigeria           | 142    |
| <b>Kretchy</b>     | 2014 | Hospital   | Depression Anxiety Stress Scale (DASS) – 21                              | Age $\geq$ 18 y, a diagnosis of hypertension, reporting prescription of at least one antihypertensive medication for a minimum of two months                                                                              | %Males: 37.25                    | 2012                | Ghana             | 400    |
| <b>Okunrinboye</b> | 2019 | Hospital   | Mini International Neuro-psychiatric Interview (MINI)                    | Age: 18 and 64 y who were diagnosed by a consultant physician at the Centre as suffering from hypertension and have been on anti-hypertensive medication for at least 6 months, spoke Yoruba or English language fluently | %Males: 38;<br>Mean age: 59.6    | 2012                | Nigeria           | 400    |
| <b>Umer</b>        | 2019 | Hospital   | Patient Health Questionnaire 9 (PHQ-9)                                   | Age $\geq$ 18 y, follow-up for hypertension                                                                                                                                                                               | %Males: 52.8                     | 2014                | Ethiopia          | 128    |

|                |      |          |                                              |                                           |                                    |           |              |     |
|----------------|------|----------|----------------------------------------------|-------------------------------------------|------------------------------------|-----------|--------------|-----|
| <b>Yaméogo</b> | 2015 | Hospital | Hospital Anxiety and Depression Scale (HADS) | Hypertensive consenting adult outpatients | %Males: 40.1;<br>Mean age:<br>54.6 | 2010-2011 | Burkina-Faso | 414 |
|----------------|------|----------|----------------------------------------------|-------------------------------------------|------------------------------------|-----------|--------------|-----|

414 NR: not reported.

For peer review only

1  
2  
3  
4  
5  
6  
7  
8  
9  
10  
11  
12  
13  
14  
15  
16  
17  
18  
19  
20  
21  
22  
23  
24  
25  
26  
27  
28  
29  
30  
31  
32  
33  
34  
35  
36  
37  
38  
39  
40  
41  
42  
43  
44  
45  
46  
47  
48  
49  
50  
51  
52  
53  
54  
55  
56  
57  
58  
59  
60

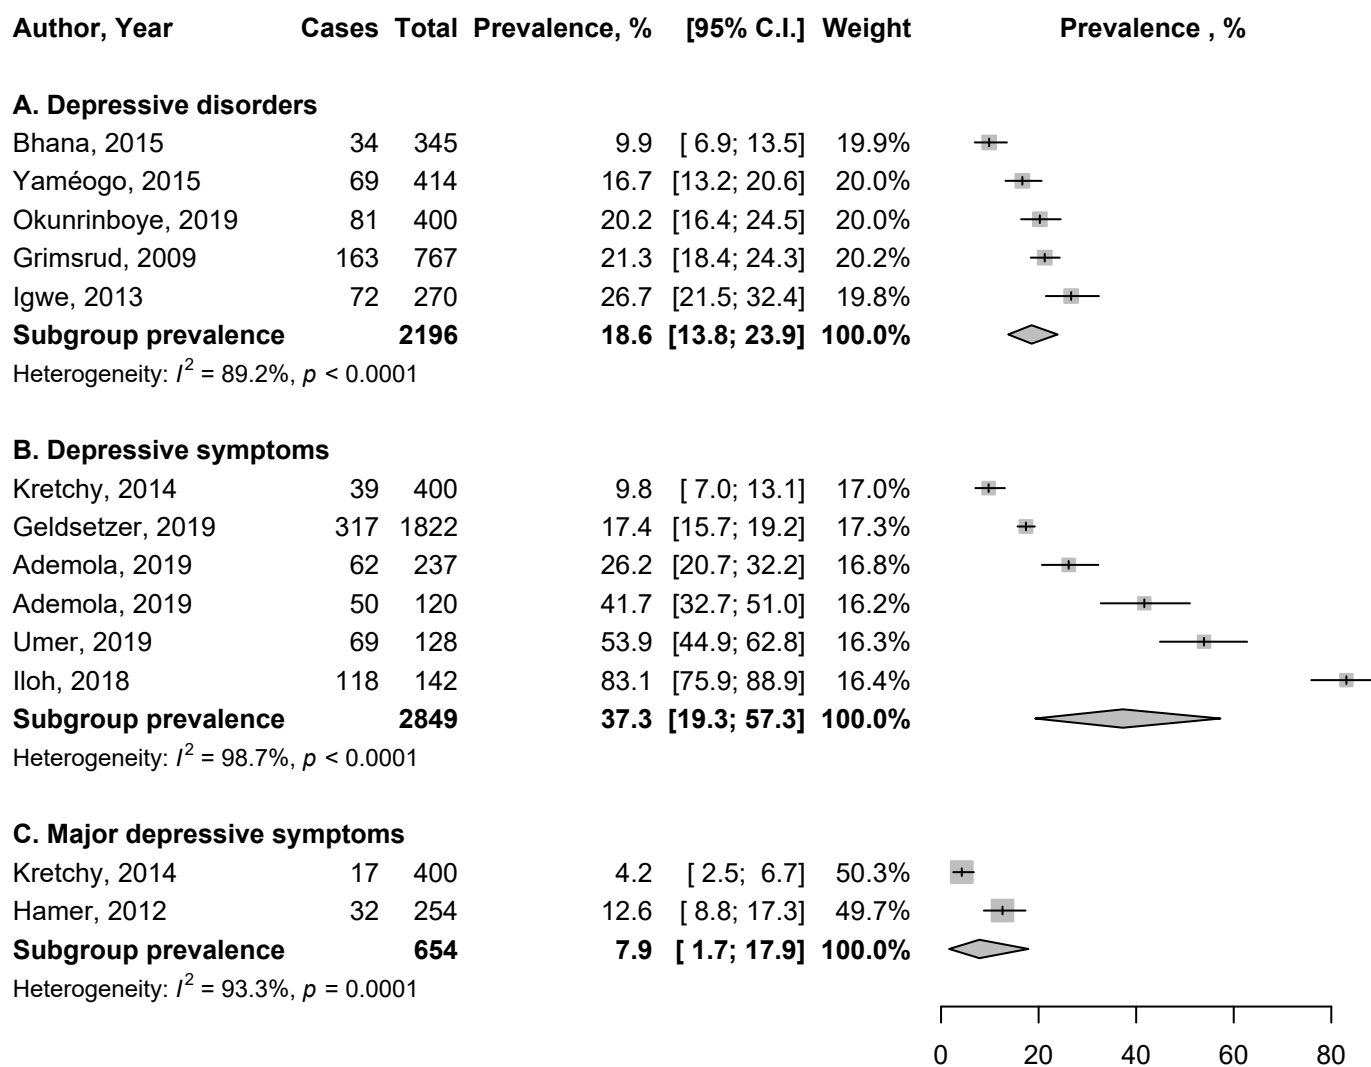



1  
2  
3 **Epidemiology of depressive disorders in people living with hypertension in**  
4  
5 **Africa: a systematic review and meta-analysis**  
6  
7  
8  
9

10 Francky Teddy **Endomba**, Mazou N. **Temgoua**, Jean Joel **Bigna**  
11  
12

13  
14  
15 **APPENDIX**  
16  
17

18  
19  
20  
21 Supplementary Table 1. Search strategy..... 2  
22 Supplementary Table 2. Methodological quality of included studies..... 4  
23  
24  
25 Supplementary Figure 1. PRISMA flow diagram ..... 5  
26  
27  
28  
29  
30  
31  
32  
33  
34  
35  
36  
37  
38  
39  
40  
41  
42  
43  
44  
45  
46  
47  
48  
49  
50  
51  
52  
53  
54  
55  
56  
57  
58  
59  
60

Supplementary Table 1. Search strategy

| Search | Search terms                                                                                                                                                                                                                                                                                                                                                                                                                                                                                                                                                                                                                                                                                                                                                                                                                                                                                                                                                                                                                                                                                                                                                                                                                                                                                                                                                                                                                                                                                                                                                                                                                                                                                                                                                                                                                                                                                                                                                                                                                                                                                                                                                                                                                                                                                                                                                                                                                                                                                                                                                                                                                                                                                                                                                                                                                                                                    |
|--------|---------------------------------------------------------------------------------------------------------------------------------------------------------------------------------------------------------------------------------------------------------------------------------------------------------------------------------------------------------------------------------------------------------------------------------------------------------------------------------------------------------------------------------------------------------------------------------------------------------------------------------------------------------------------------------------------------------------------------------------------------------------------------------------------------------------------------------------------------------------------------------------------------------------------------------------------------------------------------------------------------------------------------------------------------------------------------------------------------------------------------------------------------------------------------------------------------------------------------------------------------------------------------------------------------------------------------------------------------------------------------------------------------------------------------------------------------------------------------------------------------------------------------------------------------------------------------------------------------------------------------------------------------------------------------------------------------------------------------------------------------------------------------------------------------------------------------------------------------------------------------------------------------------------------------------------------------------------------------------------------------------------------------------------------------------------------------------------------------------------------------------------------------------------------------------------------------------------------------------------------------------------------------------------------------------------------------------------------------------------------------------------------------------------------------------------------------------------------------------------------------------------------------------------------------------------------------------------------------------------------------------------------------------------------------------------------------------------------------------------------------------------------------------------------------------------------------------------------------------------------------------|
| #1     | 'africa'/exp OR africa OR 'algeria'/exp OR algeria OR 'angola'/exp OR angola OR 'benin'/exp OR benin OR 'botswana'/exp OR botswana OR 'burkina faso'/exp OR 'burkina faso' OR 'burundi'/exp OR burundi OR 'cameroon'/exp OR cameroon OR 'canary islands'/exp OR 'canary islands' OR 'cape verde'/exp OR 'cape verde' OR 'central african republic'/exp OR 'central african republic' OR 'chad'/exp OR chad OR 'comoros'/exp OR comoros OR 'congo'/exp OR congo OR 'democratic republic of congo' OR 'djibouti'/exp OR djibouti OR 'egypt'/exp OR egypt OR 'equatorial guinea'/exp OR 'equatorial guinea' OR 'eritrea'/exp OR eritrea OR 'ethiopia'/exp OR ethiopia OR 'gabon'/exp OR gabon OR 'gambia'/exp OR gambia OR 'ghana'/exp OR ghana OR 'guinea'/exp OR guinea OR 'guinea bissau'/exp OR 'guinea bissau' OR 'ivory coast'/exp OR 'ivory coast' OR 'cote ivoire' OR 'jamahiriya' OR 'kenya'/exp OR kenya OR 'lesotho'/exp OR lesotho OR 'liberia'/exp OR liberia OR 'libya'/exp OR libya OR 'madagascar'/exp OR madagascar OR 'malawi'/exp OR malawi OR 'mali'/exp OR mali OR 'mauritania'/exp OR mauritania OR 'mauritius'/exp OR mauritius OR 'mayotte'/exp OR mayotte OR 'morocco'/exp OR morocco OR 'mozambique'/exp OR mozambique OR 'namibia'/exp OR namibia OR 'niger'/exp OR niger OR 'nigeria'/exp OR nigeria OR 'principe' OR 'reunion'/exp OR reunion OR 'rwanda'/exp OR rwanda OR 'sao tome' OR 'senegal'/exp OR senegal OR 'seychelles'/exp OR seychelles OR 'sierra leone'/exp OR 'sierra leone' OR 'somalia'/exp OR somalia OR 'south africa'/exp OR 'south africa' OR 'st helena'/exp OR 'st helena' OR 'sudan'/exp OR sudan OR 'swaziland'/exp OR swaziland OR 'tanzania'/exp OR tanzania OR 'togo'/exp OR togo OR 'tunisia'/exp OR tunisia OR 'uganda'/exp OR uganda OR 'western sahara'/exp OR 'western sahara' OR 'zaire'/exp OR zaire OR 'zambia'/exp OR zambia OR 'zimbabwe'/exp OR zimbabwe OR 'central africa'/exp OR 'central africa' OR 'central african'/exp OR 'central african' OR 'west africa'/exp OR 'west africa' OR 'west african'/exp OR 'west african' OR 'western africa'/exp OR 'western africa' OR 'western african'/exp OR 'western african' OR 'east africa'/exp OR 'east africa' OR 'east african'/exp OR 'east african' OR 'eastern africa'/exp OR 'eastern africa' OR 'eastern african'/exp OR 'eastern african' OR 'north africa'/exp OR 'north africa' OR 'north african'/exp OR 'north african' OR 'northern africa'/exp OR 'northern africa' OR 'northern african'/exp OR 'northern african' OR 'south african'/exp OR 'south african' OR 'southern africa'/exp OR 'southern africa' OR 'southern african'/exp OR 'southern african' OR 'sub saharan africa'/exp OR 'sub saharan africa' OR 'sub saharan african'/exp OR 'sub saharan african' OR 'subsaharan africa'/exp OR 'subsaharan africa' OR 'subsaharan african' |
| #2     | 'depression'/exp OR depression OR 'depressive disorder'/exp OR 'depressive disorder' OR 'depressive symptom'/exp OR 'depressive symptom' OR 'depressive neuros*' OR 'depressive syndrome*'                                                                                                                                                                                                                                                                                                                                                                                                                                                                                                                                                                                                                                                                                                                                                                                                                                                                                                                                                                                                                                                                                                                                                                                                                                                                                                                                                                                                                                                                                                                                                                                                                                                                                                                                                                                                                                                                                                                                                                                                                                                                                                                                                                                                                                                                                                                                                                                                                                                                                                                                                                                                                                                                                      |

1  
2  
3  
4  
5  
6  
7  
8  
9  
10  
11  
12  
13  
14  
15  
16  
17  
18  
19  
20  
21  
22  
23  
24  
25  
26  
27  
28  
29  
30  
31  
32  
33  
34  
35  
36  
37  
38  
39  
40  
41  
42  
43  
44  
45  
46  
47  
48  
49  
50  
51  
52  
53  
54  
55  
56  
57  
58  
59  
60

|    |                                                                                                                                                                |
|----|----------------------------------------------------------------------------------------------------------------------------------------------------------------|
| #3 | 'hypertension'/exp OR hypertension OR 'high blood pressure'/exp OR 'high blood pressure' OR (high AND ('blood'/exp OR blood) AND ('pressure'/exp OR pressure)) |
| #4 | #1 AND #2 AND #3                                                                                                                                               |

For peer review only

Supplementary Table 2. Methodological quality of included studies

| <b>Author, Year</b>      | <b>Sampling method</b> | <b>Timing of data collection</b> | <b>Sample size adequate</b> | <b>Response rate</b> | <b>Same method of data collection for all participants</b> |
|--------------------------|------------------------|----------------------------------|-----------------------------|----------------------|------------------------------------------------------------|
| <b>Ademola, 2019</b>     | Convenience            | Prospectively                    | No                          | Not described        | Yes                                                        |
| <b>Bhana, 2015</b>       | Convenience            | Prospectively                    | Yes                         | Not described        | Yes                                                        |
| <b>Geldsetzer, 2019</b>  | Stratified Random      | Prospectively                    | Yes                         | Adequate             | Yes                                                        |
| <b>Grimsrud, 2009</b>    | Stratified Multistage  | Prospectively                    | Yes                         | Not described        | Yes                                                        |
| <b>Hamer, 2012</b>       | Convenience            | Prospectively                    | Yes                         | Not described        | Yes                                                        |
| <b>Igwe, 2013</b>        | Convenience            | Prospectively                    | Yes                         | Not described        | Yes                                                        |
| <b>Iloh, 2018</b>        | Convenience            | Prospectively                    | Yes                         | Not described        | Yes                                                        |
| <b>Kretchy, 2014</b>     | Time-Location          | Prospectively                    | Yes                         | Not described        | Yes                                                        |
| <b>Okunrinboye, 2019</b> | Systematic Random      | Prospectively                    | Yes                         | Not described        | Yes                                                        |
| <b>Umer, 2019</b>        | Convenience            | Prospectively                    | No                          | Adequate             | Yes                                                        |
| <b>Yaméogo, 2015</b>     | Convenience            | Prospectively                    | Yes                         | Not described        | Yes                                                        |

Supplementary Figure 1. PRISMA flow diagram

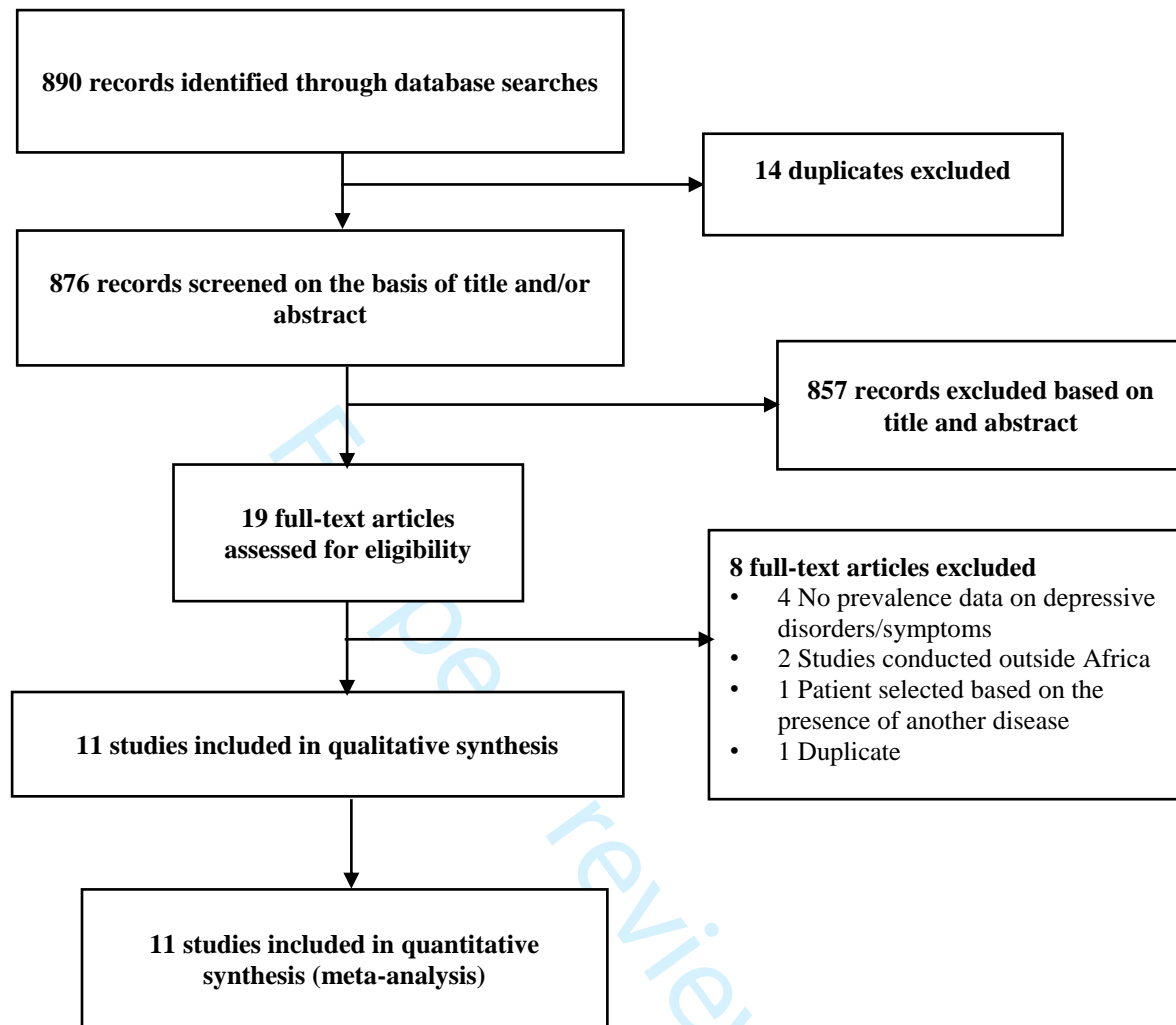

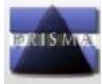

# PRISMA 2009 Checklist

| Section/topic                      | #  | Checklist item                                                                                                                                                                                                                                                                                              | Reported on page # |
|------------------------------------|----|-------------------------------------------------------------------------------------------------------------------------------------------------------------------------------------------------------------------------------------------------------------------------------------------------------------|--------------------|
| <b>TITLE</b>                       |    |                                                                                                                                                                                                                                                                                                             |                    |
| Title                              | 1  | Identify the report as a systematic review, meta-analysis, or both.                                                                                                                                                                                                                                         | 1                  |
| <b>ABSTRACT</b>                    |    |                                                                                                                                                                                                                                                                                                             |                    |
| Structured summary                 | 2  | Provide a structured summary including, as applicable: background; objectives; data sources; study eligibility criteria, participants, and interventions; study appraisal and synthesis methods; results; limitations; conclusions and implications of key findings; systematic review registration number. | 2                  |
| <b>INTRODUCTION</b>                |    |                                                                                                                                                                                                                                                                                                             |                    |
| Rationale                          | 3  | Describe the rationale for the review in the context of what is already known.                                                                                                                                                                                                                              | 5-6                |
| Objectives                         | 4  | Provide an explicit statement of questions being addressed with reference to participants, interventions, comparisons, outcomes, and study design (PICOS).                                                                                                                                                  | 6                  |
| <b>METHODS</b>                     |    |                                                                                                                                                                                                                                                                                                             |                    |
| Protocol and registration          | 5  | Indicate if a review protocol exists, if and where it can be accessed (e.g., Web address), and, if available, provide registration information including registration number.                                                                                                                               | 6                  |
| Eligibility criteria               | 6  | Specify study characteristics (e.g., PICOS, length of follow-up) and report characteristics (e.g., years considered, language, publication status) used as criteria for eligibility, giving rationale.                                                                                                      | 6-7                |
| Information sources                | 7  | Describe all information sources (e.g., databases with dates of coverage, contact with study authors to identify additional studies) in the search and date last searched.                                                                                                                                  | 7                  |
| Search                             | 8  | Present full electronic search strategy for at least one database, including any limits used, such that it could be repeated.                                                                                                                                                                               | 7, Appendix        |
| Study selection                    | 9  | State the process for selecting studies (i.e., screening, eligibility, included in systematic review, and, if applicable, included in the meta-analysis).                                                                                                                                                   | 7                  |
| Data collection process            | 10 | Describe method of data extraction from reports (e.g., piloted forms, independently, in duplicate) and any processes for obtaining and confirming data from investigators.                                                                                                                                  | 7-8                |
| Data items                         | 11 | List and define all variables for which data were sought (e.g., PICOS, funding sources) and any assumptions and simplifications made.                                                                                                                                                                       | 7-8                |
| Risk of bias in individual studies | 12 | Describe methods used for assessing risk of bias of individual studies (including specification of whether this was done at the study or outcome level), and how this information is to be used in any data synthesis.                                                                                      | 8                  |
| Summary measures                   | 13 | State the principal summary measures (e.g., risk ratio, difference in means).                                                                                                                                                                                                                               | 8                  |
| Synthesis of results               | 14 | Describe the methods of handling data and combining results of studies, if done, including measures of consistency (e.g., $I^2$ ) for each meta-analysis.                                                                                                                                                   | 8                  |

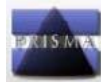

# PRISMA 2009 Checklist

Page 1 of 2

| Section/topic                 | #  | Checklist item                                                                                                                                                                                           | Reported on page # |
|-------------------------------|----|----------------------------------------------------------------------------------------------------------------------------------------------------------------------------------------------------------|--------------------|
| Risk of bias across studies   | 15 | Specify any assessment of risk of bias that may affect the cumulative evidence (e.g., publication bias, selective reporting within studies).                                                             | 8                  |
| Additional analyses           | 16 | Describe methods of additional analyses (e.g., sensitivity or subgroup analyses, meta-regression), if done, indicating which were pre-specified.                                                         | 8                  |
| <b>RESULTS</b>                |    |                                                                                                                                                                                                          |                    |
| Study selection               | 17 | Give numbers of studies screened, assessed for eligibility, and included in the review, with reasons for exclusions at each stage, ideally with a flow diagram.                                          | 9                  |
| Study characteristics         | 18 | For each study, present characteristics for which data were extracted (e.g., study size, PICOS, follow-up period) and provide the citations.                                                             | 9                  |
| Risk of bias within studies   | 19 | Present data on risk of bias of each study and, if available, any outcome level assessment (see item 12).                                                                                                | 9, Appendix        |
| Results of individual studies | 20 | For all outcomes considered (benefits or harms), present, for each study: (a) simple summary data for each intervention group (b) effect estimates and confidence intervals, ideally with a forest plot. | 9, Table 1         |
| Synthesis of results          | 21 | Present results of each meta-analysis done, including confidence intervals and measures of consistency.                                                                                                  | 9-10               |
| Risk of bias across studies   | 22 | Present results of any assessment of risk of bias across studies (see Item 15).                                                                                                                          | 9-10               |
| Additional analysis           | 23 | Give results of additional analyses, if done (e.g., sensitivity or subgroup analyses, meta-regression [see Item 16]).                                                                                    | 9-10               |
| <b>DISCUSSION</b>             |    |                                                                                                                                                                                                          |                    |
| Summary of evidence           | 24 | Summarize the main findings including the strength of evidence for each main outcome; consider their relevance to key groups (e.g., healthcare providers, users, and policy makers).                     | 10                 |
| Limitations                   | 25 | Discuss limitations at study and outcome level (e.g., risk of bias), and at review-level (e.g., incomplete retrieval of identified research, reporting bias).                                            | 12                 |
| Conclusions                   | 26 | Provide a general interpretation of the results in the context of other evidence, and implications for future research.                                                                                  | 12                 |
| <b>FUNDING</b>                |    |                                                                                                                                                                                                          |                    |
| Funding                       | 27 | Describe sources of funding for the systematic review and other support (e.g., supply of data); role of funders for the systematic review.                                                               | 13                 |

41

42 From: Moher D, Liberati A, Tetzlaff J, Altman DG, The PRISMA Group (2009). Preferred Reporting Items for Systematic Reviews and Meta-Analyses: The PRISMA Statement. PLoS Med 6(7): e1000097.  
 43 doi:10.1371/journal.pmed1000097

44 For more information, visit: [www.prisma-statement.org](http://www.prisma-statement.org).

45 For peer review only - <http://bmjopen.bmj.com/site/about/guidelines.xhtml>

46

47

# BMJ Open

## Epidemiology of depressive disorders in people living with hypertension in Africa: a systematic review and meta-analysis

|                                 |                                                                                                                                                                                                                                                                                                                                                                                   |
|---------------------------------|-----------------------------------------------------------------------------------------------------------------------------------------------------------------------------------------------------------------------------------------------------------------------------------------------------------------------------------------------------------------------------------|
| Journal:                        | <i>BMJ Open</i>                                                                                                                                                                                                                                                                                                                                                                   |
| Manuscript ID                   | bmjopen-2020-037975.R1                                                                                                                                                                                                                                                                                                                                                            |
| Article Type:                   | Original research                                                                                                                                                                                                                                                                                                                                                                 |
| Date Submitted by the Author:   | 14-Sep-2020                                                                                                                                                                                                                                                                                                                                                                       |
| Complete List of Authors:       | Endomba Angong, Francky Teddy; Health Economics and Policy Research and Evaluation for Development Results Group; University of Bourgogne, Psychiatry Internship Program<br>Mazou, Temgoua Ngou ; Health Economics and Policy Research and Evaluation for Development Results Group<br>Bigna, Jean Joel; Centre Pasteur du Cameroun, Department of Epidemiology and Public Health |
| <b>Primary Subject Heading</b>: | Mental health                                                                                                                                                                                                                                                                                                                                                                     |
| Secondary Subject Heading:      | Cardiovascular medicine                                                                                                                                                                                                                                                                                                                                                           |
| Keywords:                       | Depression & mood disorders < PSYCHIATRY, Hypertension < CARDIOLOGY, EPIDEMIOLOGY                                                                                                                                                                                                                                                                                                 |
|                                 |                                                                                                                                                                                                                                                                                                                                                                                   |

SCHOLARONE™  
Manuscripts





I, the Submitting Author has the right to grant and does grant on behalf of all authors of the Work (as defined in the below author licence), an exclusive licence and/or a non-exclusive licence for contributions from authors who are: i) UK Crown employees; ii) where BMJ has agreed a CC-BY licence shall apply, and/or iii) in accordance with the terms applicable for US Federal Government officers or employees acting as part of their official duties; on a worldwide, perpetual, irrevocable, royalty-free basis to BMJ Publishing Group Ltd ("BMJ") its licensees and where the relevant Journal is co-owned by BMJ to the co-owners of the Journal, to publish the Work in this journal and any other BMJ products and to exploit all rights, as set out in our [licence](#).

The Submitting Author accepts and understands that any supply made under these terms is made by BMJ to the Submitting Author unless you are acting as an employee on behalf of your employer or a postgraduate student of an affiliated institution which is paying any applicable article publishing charge ("APC") for Open Access articles. Where the Submitting Author wishes to make the Work available on an Open Access basis (and intends to pay the relevant APC), the terms of reuse of such Open Access shall be governed by a Creative Commons licence – details of these licences and which [Creative Commons](#) licence will apply to this Work are set out in our licence referred to above.

Other than as permitted in any relevant BMJ Author's Self Archiving Policies, I confirm this Work has not been accepted for publication elsewhere, is not being considered for publication elsewhere and does not duplicate material already published. I confirm all authors consent to publication of this Work and authorise the granting of this licence.

1  
2  
3 1 **Epidemiology of depressive disorders in people living with hypertension in**  
4  
5  
6 2 **Africa: a systematic review and meta-analysis**  
7  
8  
9 3

10  
11 4 Francky Teddy **Endomba**,<sup>1,2</sup> Mazou N. **Temgoua**,<sup>1</sup> Jean Joel **Bigna**<sup>3\*</sup>  
12  
13 5

- 14  
15 6 1. Health Economics and Policy Research and Evaluation for Development Results Group,  
16 7 Yaoundé, Cameroon  
17  
18 8 2. Psychiatry Internship Program, University of Bourgogne, 21000 Dijon, France.  
19  
20 9 3. Department of Epidemiology and Public Health, Centre Pasteur du Cameroon, Yaoundé,  
21 10 Cameroon  
22  
23 11

24  
25 12 E-mail addresses: FTE (franckytddyea@gmail.com); MNT (neurotemgoua@yahoo.fr); JJB  
26 13 (bignarimjj@yahoo.fr)  
27

28  
29 14 \*Corresponding author  
30  
31  
32 15

33  
34 16 **Word count:** 2,692; Abstract: 318 words  
35  
36  
37  
38  
39  
40  
41  
42  
43  
44  
45  
46  
47  
48  
49  
50  
51  
52  
53  
54  
55  
56  
57  
58  
59  
60

## 17 **Abstract**

18 **Objectives:** Better knowledge of epidemiology of depressive disorders in people living with  
19 hypertension can help to implement pertinent strategies to address its burden. The objective was  
20 to estimate the prevalence of depressive disorders and symptoms in people living with  
21 hypertension in Africa.

22 **Design:** Systematic review and meta-analysis.

23 **Data sources:** PubMed, EMBASE, African Index Medicus, Africa Journal Online were  
24 searched up to January 31, 2020; regardless of the language of publication.

25 **Eligibility criteria:** We included studies conducted among adults ( $\geq 18$  years) living in Africa,  
26 and reporting the prevalence of depressive disorders and symptoms.

27 **Data extraction and synthesis:** Two independent investigators selected studies, extracted data,  
28 and assessed the methodological quality of included studies by using the tool developed by  
29 Joanna Briggs Institute. Multivariate random-effects meta-analysis served to pool data by  
30 considering the variability between diagnostic tools for identifying patients with depressive  
31 disorders or symptoms.

32 **Results:** We included 11 studies with 5,299 adults with hypertension. The mean age varied  
33 between 50.3 and 59.6 years. The proportion of males varied between 28% and 54%. Data were  
34 collected between 2002 and 2017. Data were from South Africa, Nigeria, Ghana, Ethiopia, and  
35 Burkina-Faso. The adjusted prevalence of depressive disorders taking in account the variance  
36 between diagnostic tools was 17.9% (95% confidence interval [CI]: 13.0-23.4). The prevalence  
37 of depressive symptoms and major depressive symptoms was 33.3% (95%CI: 9.9-61.6) and  
38 7.8% (95%CI: 3.0-14.5). There was heterogeneity attributable to the diagnostic tools for  
39 depressive disorders and symptoms. There was no publication bias.

40 **Limitation:** All regions of Africa were not represented weakening the generalizability of  
41 findings to the entire region.

1  
2  
3 42 **Conclusion:** Depressive disorders and symptoms are prevalent in people living with  
4  
5 43 hypertension in Africa, indicating that strategies from clinicians, researchers, and public health  
6  
7 44 makers are needed to reduce its burden in the region.  
8  
9  
10 45  
11  
12 46  
13  
14  
15 47 **Keywords**  
16  
17 48 Depression; Depressive symptoms; Depressive disorders; Hypertension; Africa  
18  
19  
20  
21  
22  
23  
24  
25  
26  
27  
28  
29  
30  
31  
32  
33  
34  
35  
36  
37  
38  
39  
40  
41  
42  
43  
44  
45  
46  
47  
48  
49  
50  
51  
52  
53  
54  
55  
56  
57  
58  
59  
60

## 49 **Strengths and Limitations of this study**

- 50 • Not all sub-regions of Africa were represented in this review.
- 51 • This is the first review performed among people living with hypertension Africa to  
52 investigate the epidemiology of depressive disorders and symptoms.
- 53 • We found a huge heterogeneity between studies explained by the difference between  
54 diagnostic tools for depressive disorders.
- 55 • We were not able to explore all sources of heterogeneity due to scarcity of epidemiological  
56 data.

## 57 **Introduction**

58 Cardiovascular diseases (CVDs) are the leading killers worldwide with approximately 18  
59 million deaths per year,[1] and hypertension is involved in approximately 50% of CVDs.[2–4]  
60 According to the World Health Organization (WHO), the number of people living with  
61 hypertension worldwide is estimated at 1.13 billion, and the African continent has the highest  
62 prevalence of hypertensive patients (27%).[4] The deleterious effect of hypertension are linked  
63 to direct human consequences with increased morbidity and mortality but also harmful  
64 economic outcomes pertaining to its management and the repercussions of its complications.[5–  
65 7] Detrimental human outcomes related to chronic high blood pressure encompass target organ  
66 damage involving cerebrovascular, heart, and kidney diseases;[4,5] but also mental health  
67 repercussions notably anxiety, stress and depression.[8–10]  
68 Depressive disorder is recognized to be the most common mental health illness and the second  
69 cause of disability worldwide,[11,12] after cardiovascular diseases. It accounts for 3% of global  
70 disability adjusted life years (DALYs).[12] According to the WHO, depressive disorder affects  
71 more than 300 million people (4.4% of the world population), and its prevalence in the African  
72 continent is estimated at 9% (29.9 million of cases).[13] Some subpopulations have been  
73 identified as depression risk groups, including patients with chronic cardiometabolic conditions  
74 such as hypertension.[9,14] A wide range of previously published works addressed an interest  
75 on the interaction between hypertension and depression.[8,10,15,16] Comprehensively, the  
76 majority of these studies concluded that hypertensive disease and depressive disorder share  
77 bidirectional interplay with patients with hypertension more likely to develop depression and  
78 conversely.[8,17] As examples of evidence, a meta-analysis of 41 studies (including 31 studies  
79 from China and three from Africa) which included 30,796 patients with hypertension found that  
80 26.8% have depression,[10] and another one which included 22,367 participants found that  
81 depression significantly increase the risk of hypertension incidence with an adjusted relative

1  
2  
3 82 risk of 1.42.[15] Additionally, it has been reported that hypertensive patients with comorbid  
4  
5 83 depression are more exposed to poor medication adherence with uncontrolled blood pressure  
6  
7 84 as well as chronic vascular complications and cardiovascular disease related  
8  
9 85 mortality.[8,10,15,16,18] The burden of the depression-hypertension co-occurrence is  
10  
11 86 worsened by the fact that approximately one hypertensive patient in ten has untreated  
12  
13 87 depression.[10,19]

14  
15  
16  
17 88 Considering up-to-date scientific literature, depression in hypertensive patients is common in  
18  
19 89 western contexts,[10,20] hypertension and depression are commonly encountered amongst  
20  
21 90 African populations,[2,4,13] but data summarizing and focusing on the burden of depression  
22  
23 91 among hypertensive Africans are not yet available. Hence, we conducted this systematic review  
24  
25 92 and meta-analysis with the aim to explore the prevalence of depressive disorders/symptoms,  
26  
27 93 and major depression in individuals living with hypertension in Africa.  
28  
29  
30

31 94

## 32 33 95 **Methods**

### 34 35 96 **Design**

36  
37  
38 97 This systematic review and meta-analysis was conducted according to the Joanna Briggs  
39  
40 98 Institute guidelines.[21] This study was reported according to the preferred reporting items for  
41  
42 99 systematic reviews and meta-analyses (PRISMA) guidelines.[22] The protocol of this review  
43  
44  
45 100 was registered in PROSPERO, with the following registration number CRD42020168979.

### 46 47 101 **Eligibility criteria**

#### 48 49 102 ***Condition***

50  
51 103 We considered studies reporting the prevalence (or enough data to compute this estimate) of  
52  
53 104 depressive disorders and symptoms. We considered depressive disorders (and major depressive  
54  
55 105 disorders) diagnosed according to the Diagnostic and Statistical Manual of Mental Health  
56  
57 106 Disorders IV or V [23,24], or International Statistical Classification of Diseases and Related  
58  
59  
60

1  
2  
3 107 Health Problems-10 [25]. In studies where depressive disorders were not defined using the  
4  
5 108 aforementioned criteria, we considered the definition used by authors, including especially  
6  
7 109 diagnostic scores such as the Patient Health Questionnaire-9. Major depressive symptoms  
8  
9 110 notably included depressive mood and anhedonia.

### 111 ***Context***

112 We considered studies conducted in people living in Africa. Studies conducted in Africans  
113 living outside Africa were not considered.

### 114 ***Population***

115 We considered studies conducted in adults ( $\geq 18$  years) living with hypertension, independently  
116 of the diagnosis criteria used, of the therapeutic regimen and the control status for the  
117 hypertensive disease.

### 118 ***Study design***

119 Cross-sectional, case-control, and cohort studies.

### 120 **Data sources**

121 We searched PubMed, Excerpta Medica Database (EMBASE), Africa Index Medicus, and  
122 Africa Journal Online to identify all relevant records published up to January 31<sup>st</sup>, 2020;-without  
123 any language restriction. The search strategy in EMBASE is available in the Appendix  
124 (Supplementary Table 1). To supplement the bibliographic database searches and identify  
125 potential additional data sources, we scrutinized the reference list of all relevant original and  
126 review papers.

### 127 **Study selection**

128 Titles and abstracts of articles retrieved from literature search were independently screened by  
129 two investigators (FTE and JJB), and the full-texts of those potentially eligible were obtained  
130 and further assessed for final inclusion. Disagreements were resolved through consensus.

### 131 **Data collection and management**



1  
2  
3 132 A preconceived and standardized data extraction form was used to collect information on first  
4  
5 133 author's name, study country, year of publication, period of participants' recruitment, study  
6  
7 134 design, setting, sampling method, timing of data collection, response rate, mean or median age  
8  
9  
10 135 of the population, age range, proportion of males, number of participants with hypertension, the  
11  
12 136 number of participants with depressive disorders. In case of multinational studies, data were  
13  
14 137 separated to show the estimate within individual countries. Two investigators (FTE and JJB)  
15  
16 138 independently extracted the data from individual studies, with disagreements being resolved  
17  
18 139 through consensus.

21 140 Two investigators (FTE and JJB) independently assessed study methodological quality of  
22  
23 141 included studies with tool developed by Joanna Briggs Institute [21], with disagreements being  
24  
25 142 resolved through discussion and consensus. Risk of bias was considered low for each criterion  
26  
27 143 if studies used probabilistic sampling, prospectively collected data, had adequate sample size  
28  
29 144 (required sample size attained), response rate > 80%, and same method of data collection for  
30  
31 145 participants. Studies with low risk of bias had to have four or more criteria, two or three for  
32  
33 146 moderate risk of bias, and no or one for low risk of bias.

### 37 147 **Data synthesis and analysis**

40 148 Meta-analyses were performed with the '*meta*', '*metafor*', and '*dmetar*' packages of the  
41  
42 149 statistical software *R* (version 3.6.2). Prevalence estimates were reported with 95% confidence  
43  
44 150 interval (95%CI). Prevalence pooling was done with Freeman-Tukey double arcsine  
45  
46 151 transformation using random-effects meta-analysis model.[26] We adjusted the prevalence in a  
47  
48 152 multivariate meta-analysis to take in account the variance between tools used to identify  
49  
50 153 patients with depressive disorders/symptoms. Egger's test served for detecting the presence of  
51  
52 154 publication bias.[27] A p-value < 0.10 on Egger test was considered indicative of statistically  
53  
54 155 significant publication bias. Heterogeneity was evaluated by the  $\chi^2$  test on Cochran's Q  
55  
56 156 statistic,[28] which was quantified by  $I^2$  values. The  $I^2$  statistic estimates the percentage of total  
57  
58  
59  
60

1  
2  
3 157 variation across studies due to true between-study differences rather than chance. In general,  $I^2$   
4  
5 158 values greater than 60-70% indicate the presence of substantial heterogeneity.[29] Inter-rater  
6  
7 159 agreements between investigators for study inclusion and methodological quality assessment  
8  
9 160 were assessed using Kappa Cohen's coefficient.[30]

## 12 161 **Patient and public involvement**

14 162 Patients or the public were not involved in the design, conduct, reporting, or dissemination of  
15  
16  
17 163 our research.

18  
19 164

## 22 165 **Results**

### 24 166 **The review process and study characteristics**

26 167 We initially identified 890 records and finally retained 11 full texts (13 prevalence data) in the  
27  
28 168 meta-analysis (Supplementary Figure 1).[31–41] Agreement between investigators on selection  
29  
30  
31 169 based on title and abstract was  $\kappa = 0.88$  and  $\kappa = 1.0$  for final inclusion.

33 170 Of the 11 included studies, eight studies used non-probabilistic sampling while three used  
34  
35 171 probabilistic sampling. All studies prospectively collected and analysed data and used the same  
36  
37  
38 172 method to identify patients with depressive disorders. Sample size was adequate in nine studies  
39  
40 173 and response rate in two studies (Supplementary Table 2). Three studies had low risk of bias  
41  
42 174 and eight moderate risk. None of the studies had high risk of bias.

44 175 The characteristics of included studies are presented in the Table 1. All studies were cross-  
45  
46 176 sectional. Patient Health Questionnaire-9 was the most used tool,  $n = 4$ . The mean age varied  
47  
48 177 between 50.3 and 59.6 years. The proportion of males varied between 28% and 54%. Data on  
49  
50 178 depressive disorders/symptoms were collected between 2002 and 2017. Four studies were  
51  
52  
53 179 conducted in South Africa, three studies in Nigeria, one study in Ghana, one study in both  
54  
55  
56 180 Ghana and Nigeria, one study in Ethiopia, and one study in Burkina-Faso. None of the study  
57  
58  
59 181 was conducted in Central Africa and North Africa. Talking about the language of the tool used  
60

1  
2  
3 182 to assess depressive status, four studies indicated that they use native/local languages back  
4  
5 183 translated in English for reporting.[32,33,35,36]  
6

### 7 184 **Prevalence of depressive disorders/symptoms in people with hypertension in Africa**

8  
9  
10 185 In total, 5,299 participants with hypertension were included. There was substantial  
11  
12 186 heterogeneity for all analyses, all  $I^2 > 75\%$  (Figure 1). The prevalence of depressive disorders  
13  
14 187 was 18.6% (95%CI: 13.8-23.9; 5 studies) (Figure 1). The adjusted prevalence taking in account  
15  
16 188 the variance between diagnostic tools was 17.9% (95%CI: 13.0-23.4) with 52.7% of variance  
17  
18 189 due to difference between tools. There was no publication bias ( $p = 0.789$ ). There was no data  
19  
20 190 on major depressive disorders.  
21  
22

23  
24 191 The prevalence of depressive symptoms was 37.3% (95%CI: 19.3-57.3; 6 studies). The adjusted  
25  
26 192 prevalence taking in account the variance between diagnostic tools was 33.3% (95%CI: 9.9-  
27  
28 193 61.6) with 74.1% of variance due to difference between tools. There was no publication bias ( $p$   
29  
30 194 = 0.115).  
31  
32

33 195 The prevalence of major depressive symptoms was 7.9% (95%CI: 1.7-17.9; 2 studies). The  
34  
35 196 adjusted prevalence taking in account the variance between diagnostic tools was 7.8% (95%CI:  
36  
37 197 3.0-14.5) with 43.3% of variance due to difference between tools. The  $p$  value on Egger test  
38  
39 198 was 0.789.  
40  
41

42 199 In subgroup analysis, there was no difference between population-based and hospital-based for  
43  
44 200 all outcomes except for major depressive disorders where the prevalence was higher in  
45  
46 201 population-based study (12.6%; 95%CI: 8.8-17.0; 1 study) compared to hospital-based study  
47  
48 202 (4.2%; 95%CI: 2.5-6.5; 1 study),  $p = 0.0001$  (Supplementary Figures 2, 3, and 4). However,  
49  
50 203 there was low number of studies in compared groups. The prevalence of depressive disorders  
51  
52 204 was higher among women (23.8%; 95%CI: 18.7-29.3; 1 study) compared to men (14.5%;  
53  
54 205 95%CI: 9.3-20.6; 1 study),  $p = 0.0227$  (Supplementary Figure 5). There was no difference for  
55  
56 206 depressive symptoms (Supplementary Figure 6).  
57  
58  
59  
60

1  
2  
3 2074  
5  
6 208 **Discussion**

7  
8 209 This meta-analysis of data from 5,299 adults with hypertension living in five countries in Africa  
9  
10 210 revealed that depressive disorders and symptoms are prevalent in this population with  
11  
12 211 substantial heterogeneity according to the diagnostic tools. This systematic review suggests that  
13  
14 212 approximately one on five and one-third of patients with hypertension have respectively  
15  
16 213 depression and depressive symptoms.

17  
18 214 Globally, there are dissimilarities between our findings and previous studies on depression  
19  
20 215 among adults with hypertension. For instance, in China, compared to our findings, a meta-  
21  
22 216 analysis of 41 studies on the prevalence of depression in patients with hypertension found  
23  
24 217 higher rates of depression with a pooled prevalence of 26.9% (95%CI: 21.7% - 32.3%) [10].

25  
26 218 Our review revealed a higher prevalence of depression among patients with hypertension  
27  
28 219 compared to occidental studies. For instance, considering data of United States Multi-  
29  
30 220 Disciplinary Group Practice Observational Study which included 4,362 adult patients with  
31  
32 221 hypertension (13% of anxiety and/or depression).[42] A cross-sectional study done in Spain  
33  
34 222 among 5,954 hypertensive patients with high cardiovascular risk profile found that 15.6% had  
35  
36 223 depression.[19] These differences across regions can be explained by the changeability

37  
38 224 pertaining to the criteria and/or diagnostic tools used to screen depressive disorder across  
39  
40 225 studies.[43,44] Noteworthy, Li and colleagues who studied depressive disorder among  
41  
42 226 hypertension in a meta-analysis of 41 studies suggested that self-assessed screening tools of  
43  
44 227 depression or depressive symptoms might overestimate the prevalence of depression.[10]

45  
46 228 Indeed they found a 30% depression prevalence using self-administrated diagnostic scales  
47  
48 229 versus a 21% prevalence using clinical-interviewed tools.[10] This could be linked to patients'  
49  
50 230 confusion about depression and hypertension symptoms such as poor appetite, fatigue and sleep  
51  
52 231 disturbances.[10] In our review the most used diagnostic tool was the PHQ-9 and another fact  
53  
54  
55  
56  
57  
58  
59  
60

1  
2  
3 232 to highpoint is that differences in prevalence can also be explained by the cut-off-point used for  
4  
5 233 a same tool to define a positive screening for depression.[32,45,46] Mahmood and colleagues  
6  
7 234 while assessing depression among 411 hypertensive outpatients in a Pakistan hospital by using  
8  
9  
10 235 PHQ-9 with a score of 10 or above as cut-off point found a prevalence of 40.1%,[47] more than  
11  
12 236 two folds ours. In our study, we had a substantial heterogeneity for all analyses which can also  
13  
14 237 be related to the variance between diagnostic tools used for depression assessment. The  
15  
16 238 previously cited meta-analysis of Li and colleagues also showed evidence of high-level  
17  
18 239 heterogeneity.[10]  
19  
20  
21 240 In our sub-group analysis, we found that there was no difference between population-based and  
22  
23 241 hospital-based for all outcomes except for major depressive disorders which prevalence was  
24  
25 242 higher in population-based study. This result has to be cautiously interpreted regarding the  
26  
27 243 amount of studies in each group (only one study per group measured with depression  
28  
29 244 investigated with different tools). We also found that the prevalence of depressive disorders  
30  
31 245 was higher for women when compared to men. This finding is in accordance with what is known  
32  
33 246 concerning gender differences in depression. [48–50] This can be linked to hormonal  
34  
35 247 differences between the two genders, and the fact that women experience periods of  
36  
37 248 physiological changes such as menstruation, pregnancy and perimenopause. [49,51,52] There  
38  
39 249 are growing evidence on the potential positive role of hormone replacement therapy on  
40  
41 250 postmenopausal depression.[51,52] Previous studies on twins revealed that women are more  
42  
43 251 sensitive to interpersonal relationship.[51,53] This could be more pronounced in sub-Saharan  
44  
45 252 African cultures considering the role of ale gender in families, with as consequence a lesser  
46  
47 253 capacity to express their psychological distress.[53–55]  
48  
49 254 This meta-analysis highlights the fact that depressive disorder is frequently encountered among  
50  
51 255 hypertensive patients. This review might substantiate the relevancy to conduct further studies  
52  
53 256 with the aim to investigate on the better diagnosis tool for depression among hypertensive  
54  
55  
56  
57  
58  
59  
60

1  
2  
3 257 patients in order to reduce heterogeneity of results. Moreover, our review could justify carrying  
4  
5 258 out epidemiological studies on the depression-hypertension comorbidity in other African  
6  
7 259 regions in order to have more representative regional picture of the evidence. Since we were  
8  
9  
10 260 able to identify only 11 studies in the last 20 years our study calls for more primary research on  
11  
12 261 the relationship between hypertension and mental health in the continent, by using homogenous  
13  
14 262 diagnostic tools. Researchers, clinicians, and public health policy makers can also explore  
15  
16  
17 263 implementing registries to better measure the burden of mental health disorders in the  
18  
19 264 continent.[56–58] All this might help to establish adapted policies pertaining to the  
20  
21 265 management of hypertensive patients with depression, notably for a tailored pharmacological  
22  
23 266 treatment.[18,59,60] Nevertheless, our analysis could already draw clinician's awareness on the  
24  
25  
26 267 necessity to screen depression symptoms among hypertensive patients, especially since  
27  
28 268 previously published works found that comorbid depression contribute to more deleterious  
29  
30 269 cardiovascular outcomes.[8,10,15,16,18]  
31  
32  
33 270 This study should however be interpreted considering some limitations. First and most common  
34  
35 271 to meta-analyses of prevalence studies [61], we found a huge heterogeneity between studies for  
36  
37 272 which we undertook subgroup analysis to investigate sources of heterogeneity and adjusted  
38  
39 273 analysis to take account the variance due to diagnostic tools. However, some characteristics that  
40  
41  
42 274 may further explain heterogeneity were not reported or there were not enough studies to conduct  
43  
44 275 such analysis including sub-regions and age groups. Second, there was a substantial variability  
45  
46 276 regarding the representativeness of regions and countries, with some ones less or not  
47  
48 277 represented. This may weaken the generalizability of our findings and call for more  
49  
50  
51 278 epidemiological studies in this region. Not all studies had low risk of bias, especially, most of  
52  
53 279 studies used non-probabilistic sampling. However, due to low number of studies included in  
54  
55  
56 280 this meta-analysis, we were not able to perform sensitivity analysis to assess the robustness of  
57  
58 281 our findings based on methodological quality.  
59  
60

1  
2  
3 282 Despite these limitations, this first systematic review and meta-analysis on depressive  
4  
5 283 disorders/symptoms in people living with hypertension in Africa provided a clear summary of  
6  
7 284 the existing knowledge. This systematic review is a starting point for understanding the  
8  
9 285 epidemiology and relationship between mental health and hypertension in African countries  
10  
11 286 where it is challenging to have such data. A protocol had been registered before, and we used  
12  
13 287 rigorous methodological and statistical procedures to obtain and pool data. Furthermore, we  
14  
15 288 have taken in account the variability due to diagnostic tools. There was no publication bias.  
16  
17 289

## 21 290 **Conclusions**

23  
24 291 Overall, our review found that depressive disorders and symptoms are prevalent in people living  
25  
26 292 with hypertension in select African countries. Including an assessment of mental health in  
27  
28 293 patients with hypertension seems prudent, with the potential for intervention. However, since  
29  
30 294 our analysis has limitations pertaining to diagnostic tools consistency within studies and also to  
31  
32 295 the unrepresentative geographic distribution, further studies would be relevant in order to  
33  
34 296 reinforce our findings. All this could be a support for a personalized management of patients  
35  
36 297 with hypertension and depression.  
37  
38 298

## 42 299 **Author Contributors**

44  
45 300 Conception: JJB, FTE. Designing of the protocol: FTE, JJB. Literature search: JJB. Studies  
46  
47 301 selection: FTE, JJB. Data extraction: FTE, JJB. Data management: JJB. Data synthesis and  
48  
49 302 analysis: JJB. Writing of the first draft: JJB, FTE. Critical revision: FTE, MNT, JJB. Approved  
50  
51 303 the final version: FTE, MNT, JJB. Guarantor of the review: JJB.  
52  
53

## 54 304 **Acknowledgments**

55  
56 305 None.  
57

## 58 306 **Funding**

1  
2  
3 307 This research received no specific grant from any funding agency in the public, commercial or  
4  
5 308 not-for-profit sectors.

7  
8 309 **Competing interests**

9  
10 310 We declare no competing interests.

11  
12 311 **Patient consent**

13  
14 312 Not applicable.

15  
16  
17 313 **Data sharing statement**

18  
19 314 All data generated for this study are in the manuscript and its supporting files.

20  
21 315

22  
23 316 **References**

- 24  
25  
26  
27 317 1. GBD 2015 Risk Factors Collaborators. Global, regional, and national comparative risk  
28 318 assessment of 79 behavioural, environmental and occupational, and metabolic risks or  
29 319 clusters of risks, 1990-2015: a systematic analysis for the Global Burden of Disease Study  
30 320 2015. *Lancet Lond Engl.* 2016;388(10053):1659-724.
- 31  
32  
33 321 2. Kearney PM, Whelton M, Reynolds K, Muntner P, Whelton PK, He J. Global burden of  
34 322 hypertension: analysis of worldwide data. *Lancet Lond Engl.* 2005;365(9455):217-23.
- 35  
36 323 3. Lawes CMM, Vander Hoorn S, Rodgers A, International Society of Hypertension. Global  
37 324 burden of blood-pressure-related disease, 2001. *Lancet Lond Engl.* 2008;371(9623):1513-8.
- 38  
39 325 4. World Health Organization (WHO). Hypertension. [https://www.who.int/news-room/fact-](https://www.who.int/news-room/fact-sheets/detail/hypertension)  
40 326 [sheets/detail/hypertension](https://www.who.int/news-room/fact-sheets/detail/hypertension). Date: 2019. Date accessed: February 16, 2019.
- 41  
42  
43 327 5. Zhou B, Danaei G, Stevens GA et al. Long-term and recent trends in hypertension  
44 328 awareness, treatment, and control in 12 high-income countries: an analysis of 123 nationally  
45 329 representative surveys. *The Lancet.* 2019;394(10199):639-51.
- 46  
47 330 6. Arima H, Barzi F, Chalmers J. Mortality patterns in hypertension. *J Hypertens.* 2011;29  
48 331 Suppl 1:S3-7.
- 49  
50 332 7. Zhang D, Wang G, Zhang P, Fang J, Ayala C. Medical Expenditures Associated With  
51 333 Hypertension in the U.S., 2000–2013. *Am J Prev Med.* 2017;53(6 Suppl 2):S164-71.
- 52  
53  
54 334 8. Scalco AZ, Scalco MZ, Azul JBS, Lotufo Neto F. Hypertension and depression. *Clin Sao*  
55 335 *Paulo Braz.* 2005;60(3):241-50.
- 56  
57 336 9. Ngo VK, Rubinstein A, Ganju V et al. Grand Challenges: Integrating Mental Health Care  
58 337 into the Non-Communicable Disease Agenda. *PLOS Med.* 2013;10(5):e1001443.
- 59  
60



- 1  
2  
3 338 10. Li Z, Li Y, Chen L, Chen P, Hu Y. Prevalence of Depression in Patients With Hypertension.  
4 339 *Medicine (Baltimore)*. 2015;94(31):e1317.
- 5  
6 340 11. Rehm J, Shield KD. Global Burden of Disease and the Impact of Mental and Addictive  
7 341 Disorders. *Curr Psychiatry Rep*. 2019;21(2):10.
- 8  
9 342 12. Ferrari AJ, Charlson FJ, Norman RE et al. Burden of depressive disorders by country, sex,  
10 343 age, and year: findings from the global burden of disease study 2010. *PLoS Med*.  
11 344 2013;10(11):e1001547.
- 12  
13  
14 345 13. World Health Organization. Depression and Other Common Mental Disorders. Geneva:  
15 346 World Health Organization; 2017.
- 16  
17 347 14. Schaakxs R, Comijs HC, van der Mast RC, Schoevers RA, Beekman ATF, Penninx BWJH.  
18 348 Risk Factors for Depression: Differential Across Age? *Am J Geriatr Psychiatry*.  
19 349 2017;25(9):966-77.
- 20  
21  
22 350 15. Meng L, Chen D, Yang Y, Zheng Y, Hui R. Depression increases the risk of hypertension  
23 351 incidence: a meta-analysis of prospective cohort studies. *J Hypertens*. 2012;30(5):842-51.
- 24  
25 352 16. Song X, Zhang Z, Zhang R et al. Predictive markers of depression in hypertension. *Medicine*  
26 353 *(Baltimore)*. 2018;97(32):e11768.
- 27  
28 354 17. Sandström YK, Ljunggren G, Wändell P, Wahlström L, Carlsson AC. Psychiatric  
29 355 comorbidities in patients with hypertension--a study of registered diagnoses 2009-2013 in  
30 356 the total population in Stockholm County, Sweden. *J Hypertens*. 2016;34(3):414-20;  
31 357 discussion 420.
- 32  
33  
34 358 18. Graham N, Ward J, Mackay D et al. Impact of major depression on cardiovascular outcomes  
35 359 for individuals with hypertension: prospective survival analysis in UK Biobank. *BMJ Open*.  
36 360 2019;9:e024433.
- 37  
38  
39 361 19. Mejia-Lancheros C, Estruch R, Martínez-González MA et al. Blood pressure values and  
40 362 depression in hypertensive individuals at high cardiovascular risk. *BMC Cardiovasc*  
41 363 *Disord*. 2014;14(1):109.
- 42  
43 364 20. Xue J, Chen S, Bogner HR, Tang W, Li L, Conwell Y. The prevalence of depressive  
44 365 symptoms among older patients with hypertension in rural China. *Int J Geriatr Psychiatry*.  
45 366 2017;32(12):1411-7.
- 46  
47 367 21. Munn Z, Moola S, Lisy K, et al. Chapter 5: Systematic reviews of prevalence and incidence.  
48 368 In: Aromataris E, Munn Z, eds. *JBIM Manual for Evidence Synthesis*. Adelaide: The Joanna  
49 369 Briggs Institute 2020. p 175-215.
- 50  
51  
52 370 22. Liberati A, Altman DG, Tetzlaff J, et al. The PRISMA statement for reporting systematic  
53 371 reviews and meta-analyses of studies that evaluate healthcare interventions: explanation and  
54 372 elaboration. *BMJ* 2009;339:b2700-b00. doi: 10.1136/bmj.b2700
- 55  
56 373 23. Association AP, Staff APA, DSM-IV APATF on. Diagnostic and Statistical Manual of  
57 374 Mental Disorders, Fourth Edition: DSM-IV-TR®. American Psychiatric Association; 2000.  
58 375 996 p.
- 59  
60

- 1  
2  
3 376 24. Association AP. Diagnostic and Statistical Manual of Mental Disorders (DSM-5®).  
4 377 American Psychiatric Pub; 2013. 1414 p.  
5  
6 378 25. WHO, Organization WH, Staff WHO. The ICD-10 Classification of Mental and  
7 379 Behavioural Disorders: Clinical Descriptions and Diagnostic Guidelines. World Health  
8 380 Organization; 1992. 377 p.  
9  
10 381 26. Barendregt JJ, Doi SA, Lee YY, et al. Meta-analysis of prevalence. *Journal of epidemiology*  
11 382 *and community health* 2013;67(11):974-8. doi: 10.1136/jech-2013-203104 [published  
12 383 Online First: 2013/08/22]  
13  
14 384 27. Egger M, Davey Smith G, Schneider M, et al. Bias in meta-analysis detected by a simple,  
15 385 graphical test. *BMJ (Clinical research ed)* 1997;315(7109):629-34. [published Online First:  
16 386 1997/10/06]  
17  
18 387 28. Cochran WG. The Combination of Estimates from Different Experiments. *Biometrics*  
19 388 1954;10(1):101-29.  
20  
21 389 29. Higgins JP, Thompson SG. Quantifying heterogeneity in a meta-analysis. *Statistics in*  
22 390 *medicine* 2002;21(11):1539-58. doi: 10.1002/sim.1186 [published Online First:  
23 391 2002/07/12]  
24  
25 392 30. Viera AJ, Garrett JM. Understanding interobserver agreement: the kappa statistic. *Family*  
26 393 *medicine* 2005;37(5):360-3. [published Online First: 2005/05/11]  
27  
28 394 31. Igwe MN, Uwakwe R, Ahanotu CA, et al. Factors associated with depression and suicide  
29 395 among patients with diabetes mellitus and essential hypertension in a Nigerian teaching  
30 396 hospital. *African Health Sciences* 2013;13(1):68-77. doi: 10.4314/ahs.v13i1.10  
31  
32 397 32. Bhana A, Rathod SD, Selohilwe O, et al. The validity of the Patient Health Questionnaire  
33 398 for screening depression in chronic care patients in primary health care in South Africa.  
34 399 *BMC Psychiatry* 2015;15(1) doi: 10.1186/s12888-015-0503-0  
35  
36 400 33. Umer H, Negash A, Birkie M, et al. Determinates of depressive disorder among adult  
37 401 patients with cardiovascular disease at outpatient cardiac clinic Jimma University Teaching  
38 402 Hospital, South West Ethiopia: Cross-sectional study. *International Journal of Mental*  
39 403 *Health Systems* 2019;13(1) doi: 10.1186/s13033-019-0269-8  
40  
41 404 34. Kretchy IA, Owusu-Daaku FT, Danquah SA. Mental health in hypertension: Assessing  
42 405 symptoms of anxiety, depression and stress on anti-hypertensive medication adherence.  
43 406 *International Journal of Mental Health Systems* 2014;8(1) doi: 10.1186/1752-4458-8-25  
44  
45 407 35. Hamer M, Frasura-Smith N, Lespérance F, et al. Depressive symptoms and 24-hour  
46 408 ambulatory blood pressure in Africans: The SABPA study. *International Journal of*  
47 409 *Hypertension* 2012;2012 doi: 10.1155/2012/426803  
48  
49 410 36. Geldsetzer P, Vaikath M, Wagner R, et al. Depressive Symptoms and Their Relation to Age  
50 411 and Chronic Diseases Among Middle-Aged and Older Adults in Rural South Africa. *The*  
51 412 *journals of gerontology Series A, Biological sciences and medical sciences* 2019;74(6):957-  
52 413 63. doi: 10.1093/gerona/gly145  
53  
54  
55  
56  
57  
58  
59  
60

- 1  
2  
3 414 37. Ademola AD, Boima V, Odusola AO, et al. Prevalence and determinants of depression  
4 415 among patients with hypertension: A cross-sectional comparison study in Ghana and  
5 416 Nigeria. *Nigerian journal of clinical practice* 2019;22(4):558-65. doi:  
6 417 10.4103/njcp.njcp\_351\_18
- 8  
9 418 38. Iloh GUP, Aguocho GU, Amadi AN, et al. Depression among ambulatory adult patients in  
10 419 a primary care clinic in southeastern Nigeria. *The Nigerian postgraduate medical journal*  
11 420 2018;25(4):204-12. doi: 10.4103/npmj.npmj\_107\_18
- 13 421 39. Okunrinboye HI, Otakpor AN, Ilesanmi OS. Depression and medication-adherence in  
14 422 patients with hypertension attending a tertiary health facility in South-West Nigeria. *Pan*  
15 423 *African Medical Journal* 2019;33 doi: 10.11604/pamj.2019.33.27.12941
- 17 424 40. Grimsrud A, Stein DJ, Seedat S, et al. The association between hypertension and depression  
18 425 and anxiety disorders: Results from a nationally-representative sample of South African  
19 426 adults. *PLoS ONE* 2009;4(5) doi: 10.1371/journal.pone.0005552
- 21 427 41. Yaméogo NV, Samadoulougou A, Kagambèga LJ, et al. Sleep disorders, anxiety and  
22 428 depressive symptoms and cardiovascular risk among hypertensive black Africans: Cross-  
23 429 sectional study of 414 hypertensive followed as outpatients at the Central University  
24 430 Hospital of Ouagadougou (Burkina Faso). *Pan African Medical Journal* 2015;21:185-96.  
25 431 doi: 10.11604/pamj.2015.21.115.5219
- 28 432 42. Ho AK, Thorpe CT, Pandhi N, Palta M, Smith MA, Johnson HM. Association of anxiety  
29 433 and depression with hypertension control: a US multidisciplinary group practice  
30 434 observational study. *J Hypertens.* 2015;33(11):2215-22.
- 33 435 43. Levis B, Yan XW, He C, Sun Y, Benedetti A, Thombs BD. Comparison of depression  
34 436 prevalence estimates in meta-analyses based on screening tools and rating scales versus  
35 437 diagnostic interviews: a meta-research review. *BMC Med.* 2019;17:65.
- 37 438 44. De Joode JW, van Dijk SEM, Walburg FS et al. Diagnostic accuracy of depression  
38 439 questionnaires in adult patients with diabetes: A systematic review and meta-analysis. *PLoS*  
39 440 *ONE.* 2019;14(6):e0218512.
- 41 441 45. Manea L, Gilbody S, McMillan D. Optimal cut-off score for diagnosing depression with  
42 442 the Patient Health Questionnaire (PHQ-9): a meta-analysis. *CMAJ Can Med Assoc J.*  
43 443 2012;184(3):E191-6.
- 46 444 46. Levis B, Benedetti A, Thombs BD. Accuracy of Patient Health Questionnaire-9 (PHQ-9)  
47 445 for screening to detect major depression: individual participant data meta-analysis. *BMJ.*  
48 446 2019;365:11476.
- 50 447 47. Mahmood S, Hassan SZ, Tabraze M et al. Prevalence and Predictors of Depression  
51 448 Amongst Hypertensive Individuals in Karachi, Pakistan. *Cureus.* 2017;9(6):e1397.
- 53 449  
54 450 48. Abate KH. Gender Disparity in Prevalence of Depression Among Patient Population: A  
55 451 Systematic Review. *Ethiop J Health Sci.* 2013;23(3):283-8.
- 57 452 49. Salk RH, Hyde JS, Abramson LY. Gender Differences in Depression in Representative  
58 453 National Samples: Meta-Analyses of Diagnoses and Symptoms. *Psychol Bull.*  
59 454 2017;143(8):783-822.

- 1  
2  
3 455 50. Picco L, Subramaniam M, Abdin E, Vaingankar JA, Chong SA. Gender differences in  
4 456 major depressive disorder: findings from the Singapore Mental Health Study. *Singapore*  
5 457 *Med J*. 2017;58(11):649-55.
- 7 458 51. Albert PR. Why is depression more prevalent in women? *J Psychiatry Neurosci JPN*.  
8 459 2015;40(4):219-21.
- 10 460 52. Bromberger JT, Epperson CN. Depression During and After the Perimenopause: Impact  
11 461 of Hormones, Genetics, and Environmental Determinants of Disease. *Obstet Gynecol Clin*  
12 462 *North Am*. 2018;45(4):663-78.
- 15 463 53. Call JB, Shafer K. Gendered Manifestations of Depression and Help Seeking Among Men.  
16 464 *Am J Mens Health*. 2018;12(1):41-51.
- 18 465 54. Bailey RK, Mokonogho J, Kumar A. Racial and ethnic differences in depression: current  
19 466 perspectives. *Neuropsychiatr Dis Treat*. 2019;15:603-9.
- 22 467 55. Ikram UZ, Snijder MB, de Wit MAS, Schene AH, Stronks K, Kunst AE. Perceived ethnic  
23 468 discrimination and depressive symptoms: the buffering effects of ethnic identity, religion  
24 469 and ethnic social network. *Soc Psychiatry Psychiatr Epidemiol*. 2016;51:679-88.
- 26 470 56. Prakash J, Ramakrishnan T, Das RC, Srivastava K, Mehta S, Shashikumar R. Central  
27 471 registry in psychiatry: A structured review. *Ind Psychiatry J*. 2014;23(1):10-4.
- 29 472 57. Yang M, Loeb DF, Sprowell AJ, Trinkley KE. Design and Implementation of a  
30 473 Depression Registry for Primary Care. *Am J Med Qual Off J Am Coll Med Qual*.  
31 474 2019;34(1):59-66.
- 34 475 58. Stewart R, Davis K. « Big data » in mental health research: current status and emerging  
35 476 possibilities. *Soc Psychiatry Psychiatr Epidemiol*. 2016;51(8):1055-72.
- 37 477 59. Peixoto MF, Cesaretti M, Hood SD, Tavares A. Effects of SSRI medication on heart rate  
38 478 and blood pressure in individuals with hypertension and depression. *Clin Exp Hypertens*  
39 479 *N Y N 1993*. 2019;41(5):428-33.
- 41 480 60. Offidani E, Benasi G, Charlson ME, Ravenell JE, Boutin-Foster C. Impact of Depression  
42 481 and Demoralization on Blood Pressure Control in African Americans with Hypertension:  
43 482 Findings from the TRIUMPH Trial. *J Racial Ethn Health Disparities*. 2018;5(5):913-8
- 46 483 61. Bigna JJ, Nansseu JR, Kaze AD, et al. The Authors Respond. *Epidemiology*  
47 484 2018;29(6):e58 e59. doi: 10.1097/ede.0000000000000882 [published Online First:  
48 485 2018/06/19]

486

487

1  
2  
3  
4  
5  
6  
7  
8  
9  
10  
11  
12  
13  
14  
15  
16  
17  
18  
19  
20  
21  
22  
23  
24  
25  
26  
27  
28  
29  
30  
31  
32  
33  
34  
35  
36  
37  
38  
39  
40  
41  
42  
43  
44  
45  
46  
47  
48  
49  
50  
51  
52  
53  
54  
55  
56  
57  
58  
59  
60

488 **Figures legend**

489 Figure 1. Crude prevalence of depressive disorders/symptoms in people living with  
490 hypertension in Africa

For peer review only

491 **Table 1. Characteristics of included studies**

| Author            | Year | Design, Setting             | Diagnosis of conditions                                                  | Validity of the tool used | Language of the tool used  | Inclusion criteria                                                                                                                                                                        | Population                      | Period of inclusion | Country        | Sample |
|-------------------|------|-----------------------------|--------------------------------------------------------------------------|---------------------------|----------------------------|-------------------------------------------------------------------------------------------------------------------------------------------------------------------------------------------|---------------------------------|---------------------|----------------|--------|
| <b>Ademola</b>    | 2019 | Cross-sectional, Hospital   | Patient Health Questionnaire 9 (PHQ-9)                                   | Validated                 | NR                         | Age $\geq$ 18 y, diagnosis of hypertension, treatment with an antihypertensive medication for at least 12 months                                                                          | %Males: 41.7;<br>Mean age: 57   | 2013                | Ghana, Nigeria | 357    |
| <b>Bhana</b>      | 2015 | Cross-sectional, Population | Depression module of the Structured Clinical Interview for DSM-IV (SCID) | NR                        | English, seTswana          | Age $\geq$ 18 y, clinic attendance for routine chronic disease services (e.g., HIV, hypertension, diabetes) and ability to comprehend and complete study components in Tswana or English. | NR                              | 2014                | South Africa   | 345    |
| <b>Geldsetzer</b> | 2019 | Cross-sectional, Population | Center for Epidemiological Studies—Depression (CES-D) screening tool     | NR                        | English, Shangaan          | Age $\geq$ 40 y and continuously living in the area during the 12 months prior to study enrolment                                                                                         | %Males: 37.4<br>Mean age : NR   | 2014-2015           | South Africa   | 1822   |
| <b>Grimsrud</b>   | 2009 | Cross-sectional, Population | Composite International Diagnostic Interview Version 3.0 (CIDI-3.0)      | NR                        | NR                         | South Africans $\geq$ 18 y who lived in households and hostels during the field period of the study                                                                                       | %Males: 28.0;<br>Mean age: 50.3 | 2002-2004           | South Africa   | 767    |
| <b>Hamer</b>      | 2012 | Cross-sectional, Population | Patient Health Questionnaire 9 (PHQ-9)                                   | Validated                 | English and local language | Age: 25-60 y with hypertension                                                                                                                                                            | NR                              | 2008-2009           | South Africa   | 254    |
| <b>Igwe</b>       | 2013 | Cross-sectional, Hospital   | Mini International Neuro-psychiatric Interview (MINI)                    | NR                        | NR                         | Age: 18 - 64 y. Hypertension for at least 1 year and stable without need for hospital admission for 3 months prior to assessment                                                          | %Males: 53.7;<br>Mean age: 50.4 | 2010-2011           | Nigeria        | 270    |
| <b>Iloh</b>       | 2018 | Cross-sectional, Hospital   | Patient Health Questionnaire 9 (PHQ-9)                                   | Validated                 | NR                         | Age $\geq$ 18 y with hypertension                                                                                                                                                         | %Males: 40.7;<br>Mean age : NR  | 2017                | Nigeria        | 142    |

|                    |      |                           |                                                       |           |                              |                                                                                                                                                                                                                           |                                  |           |              |     |
|--------------------|------|---------------------------|-------------------------------------------------------|-----------|------------------------------|---------------------------------------------------------------------------------------------------------------------------------------------------------------------------------------------------------------------------|----------------------------------|-----------|--------------|-----|
| <b>Kretchy</b>     | 2014 | Cross-sectional, Hospital | Depression Anxiety Stress Scale (DASS) – 21           | NR        | NR                           | Age ≥ 18 y, a diagnosis of hypertension, reporting prescription of at least one antihypertensive medication for a minimum of two months                                                                                   | %Males: 37.3;<br>Mean age : NR   | 2012      | Ghana        | 400 |
| <b>Okunrinboye</b> | 2019 | Cross-sectional, Hospital | Mini International Neuro-psychiatric Interview (MINI) | NR        | Yoruba, English              | Age: 18 and 64 y who were diagnosed by a consultant physician at the Centre as suffering from hypertension and have been on anti-hypertensive medication for at least 6 months, spoke Yoruba or English language fluently | %Males: 38.0;<br>Mean age: 59.6y | 2012      | Nigeria      | 400 |
| <b>Umer</b>        | 2019 | Cross-sectional, Hospital | Patient Health Questionnaire 9 (PHQ-9)                | Validated | English, Afan Oromo, Amharic | Age ≥ 18 y, follow-up for hypertension                                                                                                                                                                                    | %Males: 52.8;<br>Mean age : NR   | 2014      | Ethiopia     | 128 |
| <b>Yaméogo</b>     | 2015 | Cross-sectional, Hospital | Hospital Anxiety and Depression Scale (HADS)          | NR        | NR                           | Hypertensive consenting adult outpatients                                                                                                                                                                                 | %Males: 40.1;<br>Mean age: 54.6y | 2010-2011 | Burkina-Faso | 414 |

492 NR: not reported.

493

1  
2  
3  
4  
5  
6  
7  
8  
9  
10  
11  
12  
13  
14  
15  
16  
17  
18  
19  
20  
21  
22  
23  
24  
25  
26  
27  
28  
29  
30  
31  
32  
33  
34  
35  
36  
37  
38  
39  
40  
41  
42  
43  
44  
45  
46  
47  
48  
49  
50  
51  
52  
53  
54  
55  
56  
57  
58  
59  
60





1  
2  
3 **Epidemiology of depressive disorders in people living with hypertension in**  
4  
5  
6 **Africa: a systematic review and meta-analysis**  
7  
8  
9

10 Francky Teddy **Endomba**, Mazou N. **Temgoua**, Jean Joel **Bigna**  
11  
12  
13  
14

15 **APPENDIX**  
16  
17  
18  
19  
20

21 Supplementary Table 1. Search strategy..... 2  
22  
23 Supplementary Table 2. Methodological quality of included studies..... 4  
24  
25  
26 Supplementary Figure 1. PRISMA flow diagram ..... 5  
27 Supplementary Figure 2. Meta-analysis prevalence of depressive disorders by setting..... 6  
28 Supplementary Figure 3. Meta-analysis prevalence of depressive symptoms by setting ..... 6  
29 Supplementary Figure 4. Meta-analysis prevalence of major depressive disorders by setting ..... 7  
30 Supplementary Figure 5. Meta-analysis prevalence of depressive disorders by sex..... 8  
31 Supplementary Figure 6. Meta-analysis prevalence of depressive symptoms by sex..... 8  
32  
33  
34  
35  
36  
37  
38  
39  
40  
41  
42  
43  
44  
45  
46  
47  
48  
49  
50  
51  
52  
53  
54  
55  
56  
57  
58  
59  
60

Supplementary Table 1. Search strategy

| Search | Search terms                                                                                                                                                                                                                                                                                                                                                                                                                                                                                                                                                                                                                                                                                                                                                                                                                                                                                                                                                                                                                                                                                                                                                                                                                                                                                                                                                                                                                                                                                                                                                                                                                                                                                                                                                                                                                                                                                                                                                                                                                                                                                                                                                                                                                                                                                                                                                                                                                                                                                                                                                                                                                                                                                                                                                                                                                                                                    |
|--------|---------------------------------------------------------------------------------------------------------------------------------------------------------------------------------------------------------------------------------------------------------------------------------------------------------------------------------------------------------------------------------------------------------------------------------------------------------------------------------------------------------------------------------------------------------------------------------------------------------------------------------------------------------------------------------------------------------------------------------------------------------------------------------------------------------------------------------------------------------------------------------------------------------------------------------------------------------------------------------------------------------------------------------------------------------------------------------------------------------------------------------------------------------------------------------------------------------------------------------------------------------------------------------------------------------------------------------------------------------------------------------------------------------------------------------------------------------------------------------------------------------------------------------------------------------------------------------------------------------------------------------------------------------------------------------------------------------------------------------------------------------------------------------------------------------------------------------------------------------------------------------------------------------------------------------------------------------------------------------------------------------------------------------------------------------------------------------------------------------------------------------------------------------------------------------------------------------------------------------------------------------------------------------------------------------------------------------------------------------------------------------------------------------------------------------------------------------------------------------------------------------------------------------------------------------------------------------------------------------------------------------------------------------------------------------------------------------------------------------------------------------------------------------------------------------------------------------------------------------------------------------|
| #1     | 'africa'/exp OR africa OR 'algeria'/exp OR algeria OR 'angola'/exp OR angola OR 'benin'/exp OR benin OR 'botswana'/exp OR botswana OR 'burkina faso'/exp OR 'burkina faso' OR 'burundi'/exp OR burundi OR 'cameroon'/exp OR cameroon OR 'canary islands'/exp OR 'canary islands' OR 'cape verde'/exp OR 'cape verde' OR 'central african republic'/exp OR 'central african republic' OR 'chad'/exp OR chad OR 'comoros'/exp OR comoros OR 'congo'/exp OR congo OR 'democratic republic of congo' OR 'djibouti'/exp OR djibouti OR 'egypt'/exp OR egypt OR 'equatorial guinea'/exp OR 'equatorial guinea' OR 'eritrea'/exp OR eritrea OR 'ethiopia'/exp OR ethiopia OR 'gabon'/exp OR gabon OR 'gambia'/exp OR gambia OR 'ghana'/exp OR ghana OR 'guinea'/exp OR guinea OR 'guinea bissau'/exp OR 'guinea bissau' OR 'ivory coast'/exp OR 'ivory coast' OR 'cote ivoire' OR 'jamahiriya' OR 'kenya'/exp OR kenya OR 'lesotho'/exp OR lesotho OR 'liberia'/exp OR liberia OR 'libya'/exp OR libya OR 'madagascar'/exp OR madagascar OR 'malawi'/exp OR malawi OR 'mali'/exp OR mali OR 'mauritania'/exp OR mauritania OR 'mauritius'/exp OR mauritius OR 'mayotte'/exp OR mayotte OR 'morocco'/exp OR morocco OR 'mozambique'/exp OR mozambique OR 'namibia'/exp OR namibia OR 'niger'/exp OR niger OR 'nigeria'/exp OR nigeria OR 'principe' OR 'reunion'/exp OR reunion OR 'rwanda'/exp OR rwanda OR 'sao tome' OR 'senegal'/exp OR senegal OR 'seychelles'/exp OR seychelles OR 'sierra leone'/exp OR 'sierra leone' OR 'somalia'/exp OR somalia OR 'south africa'/exp OR 'south africa' OR 'st helena'/exp OR 'st helena' OR 'sudan'/exp OR sudan OR 'swaziland'/exp OR swaziland OR 'tanzania'/exp OR tanzania OR 'togo'/exp OR togo OR 'tunisia'/exp OR tunisia OR 'uganda'/exp OR uganda OR 'western sahara'/exp OR 'western sahara' OR 'zaire'/exp OR zaire OR 'zambia'/exp OR zambia OR 'zimbabwe'/exp OR zimbabwe OR 'central africa'/exp OR 'central africa' OR 'central african'/exp OR 'central african' OR 'west africa'/exp OR 'west africa' OR 'west african'/exp OR 'west african' OR 'western africa'/exp OR 'western africa' OR 'western african'/exp OR 'western african' OR 'east africa'/exp OR 'east africa' OR 'east african'/exp OR 'east african' OR 'eastern africa'/exp OR 'eastern africa' OR 'eastern african'/exp OR 'eastern african' OR 'north africa'/exp OR 'north africa' OR 'north african'/exp OR 'north african' OR 'northern africa'/exp OR 'northern africa' OR 'northern african'/exp OR 'northern african' OR 'south african'/exp OR 'south african' OR 'southern africa'/exp OR 'southern africa' OR 'southern african'/exp OR 'southern african' OR 'sub saharan africa'/exp OR 'sub saharan africa' OR 'sub saharan african'/exp OR 'sub saharan african' OR 'subsaharan africa'/exp OR 'subsaharan africa' OR 'subsaharan african' |
| #2     | 'depression'/exp OR depression OR 'depressive disorder'/exp OR 'depressive disorder' OR 'depressive symptom'/exp OR 'depressive symptom' OR 'depressive neuros*' OR 'depressive syndrome*'                                                                                                                                                                                                                                                                                                                                                                                                                                                                                                                                                                                                                                                                                                                                                                                                                                                                                                                                                                                                                                                                                                                                                                                                                                                                                                                                                                                                                                                                                                                                                                                                                                                                                                                                                                                                                                                                                                                                                                                                                                                                                                                                                                                                                                                                                                                                                                                                                                                                                                                                                                                                                                                                                      |

|    |                                                                                                                                                                |
|----|----------------------------------------------------------------------------------------------------------------------------------------------------------------|
| #3 | 'hypertension'/exp OR hypertension OR 'high blood pressure'/exp OR 'high blood pressure' OR (high AND ('blood'/exp OR blood) AND ('pressure'/exp OR pressure)) |
| #4 | #1 AND #2 AND #3                                                                                                                                               |

For peer review only

Supplementary Table 2. Methodological quality of included studies

| <b>Author, Year</b>      | <b>Sampling method</b> | <b>Timing of data collection</b> | <b>Sample size adequate</b> | <b>Response rate</b> | <b>Same method of data collection for all participants</b> | <b>SUMMARY (Risk of bias)</b> |
|--------------------------|------------------------|----------------------------------|-----------------------------|----------------------|------------------------------------------------------------|-------------------------------|
| <b>Ademola, 2019</b>     | Convenience            | Prospectively                    | No                          | Not described        | Yes                                                        | Moderate                      |
| <b>Bhana, 2015</b>       | Convenience            | Prospectively                    | Yes                         | Not described        | Yes                                                        | Moderate                      |
| <b>Geldsetzer, 2019</b>  | Stratified Random      | Prospectively                    | Yes                         | Adequate             | Yes                                                        | Low                           |
| <b>Grimsrud, 2009</b>    | Stratified Multistage  | Prospectively                    | Yes                         | Not described        | Yes                                                        | Low                           |
| <b>Hamer, 2012</b>       | Convenience            | Prospectively                    | Yes                         | Not described        | Yes                                                        | Moderate                      |
| <b>Igwe, 2013</b>        | Convenience            | Prospectively                    | Yes                         | Not described        | Yes                                                        | Moderate                      |
| <b>Iloh, 2018</b>        | Convenience            | Prospectively                    | Yes                         | Not described        | Yes                                                        | Moderate                      |
| <b>Kretchy, 2014</b>     | Time-Location          | Prospectively                    | Yes                         | Not described        | Yes                                                        | Moderate                      |
| <b>Okunrinboye, 2019</b> | Systematic Random      | Prospectively                    | Yes                         | Not described        | Yes                                                        | Low                           |
| <b>Umer, 2019</b>        | Convenience            | Prospectively                    | No                          | Adequate             | Yes                                                        | Moderate                      |
| <b>Yaméogo, 2015</b>     | Convenience            | Prospectively                    | Yes                         | Not described        | Yes                                                        | Moderate                      |

Supplementary Figure 1. PRISMA flow diagram

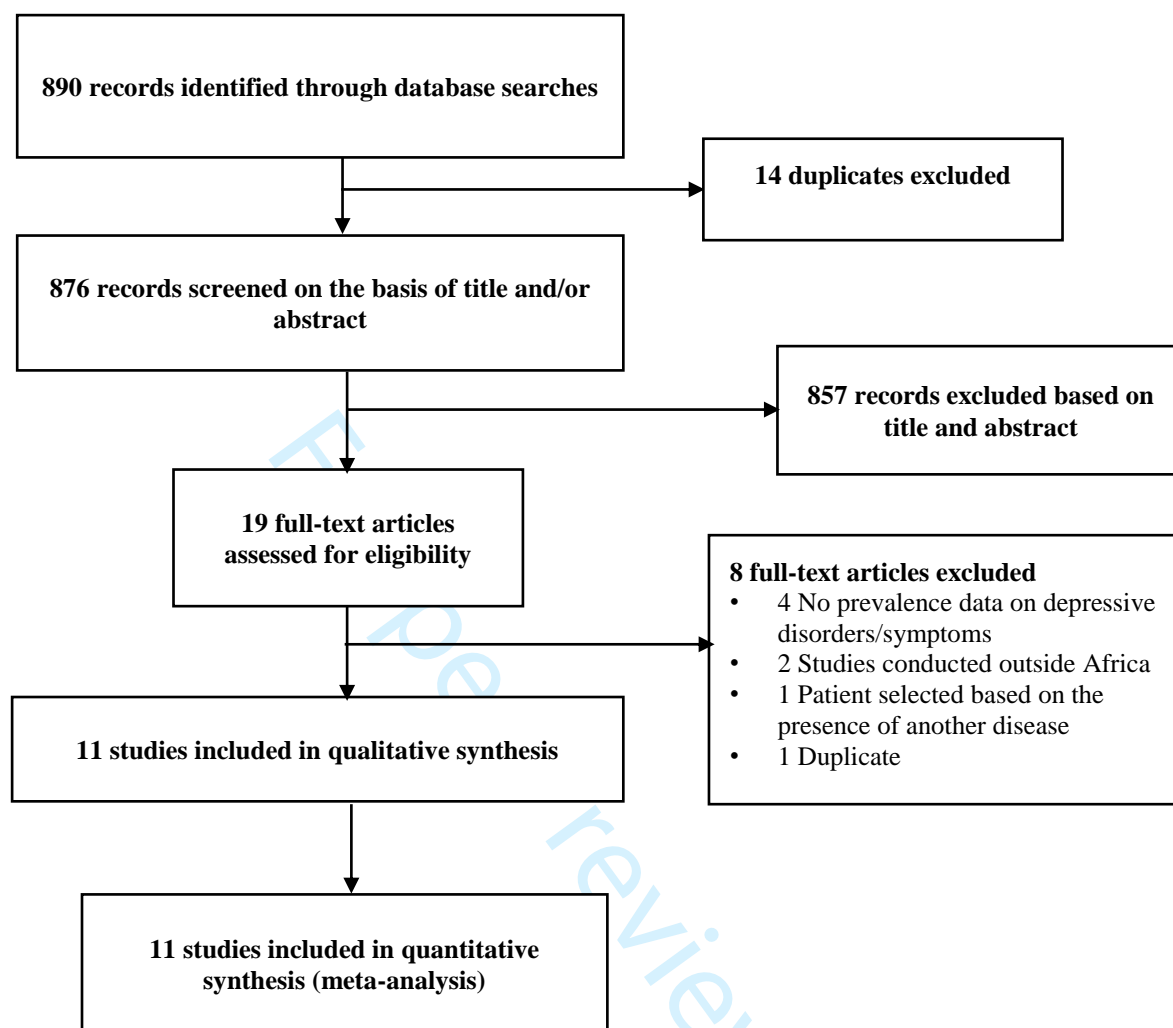

Supplementary Figure 2. Meta-analysis prevalence of depressive disorders by setting

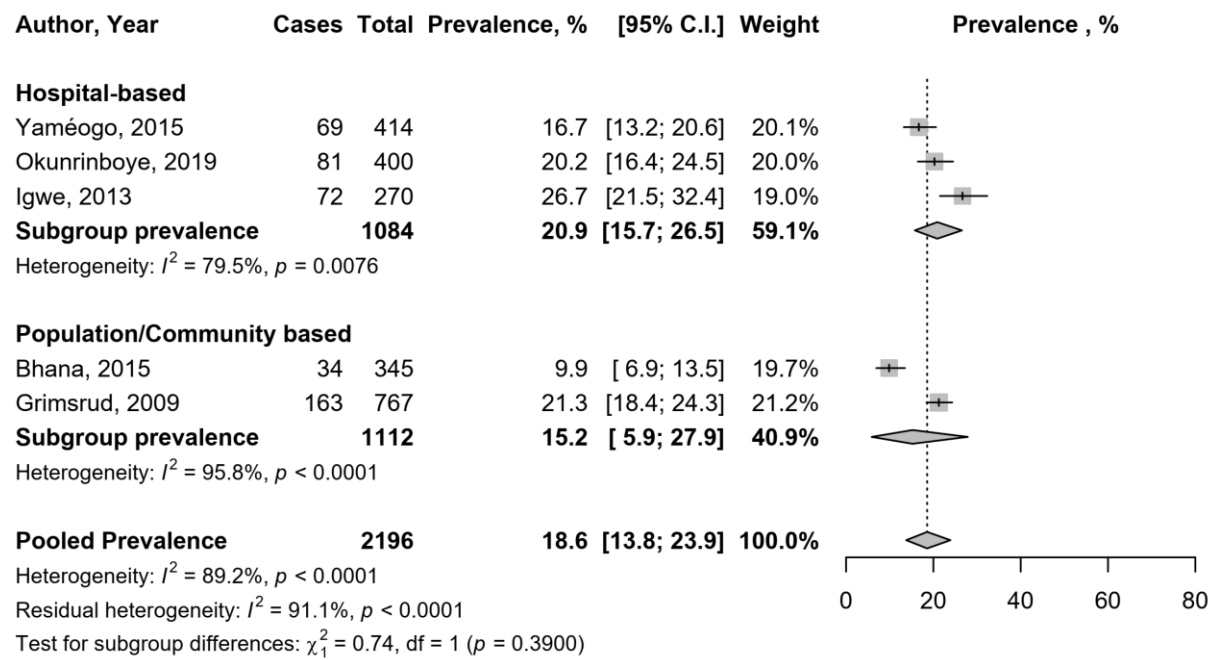

Supplementary Figure 3. Meta-analysis prevalence of depressive symptoms by setting

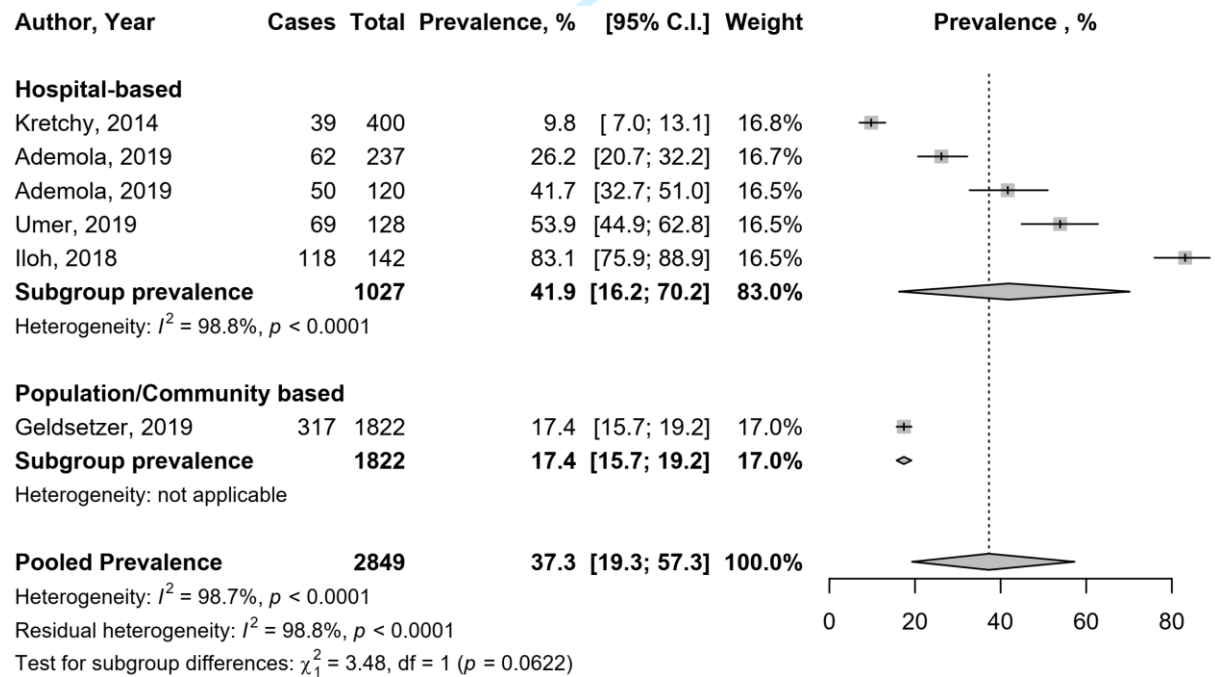

Supplementary Figure 4. Meta-analysis prevalence of major depressive disorders by setting

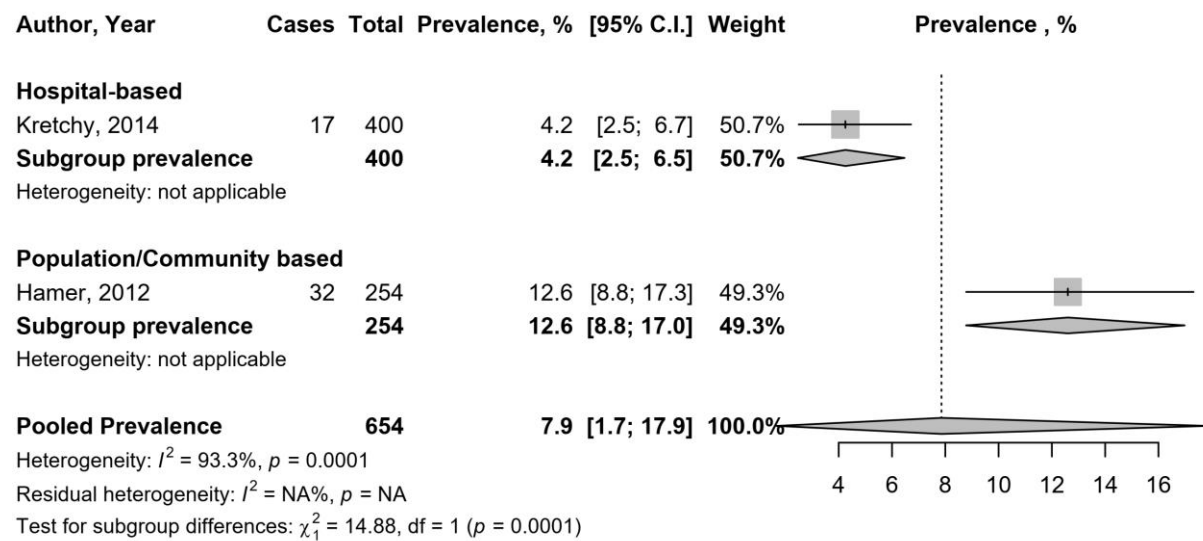

Supplementary Figure 5. Meta-analysis prevalence of depressive disorders by sex

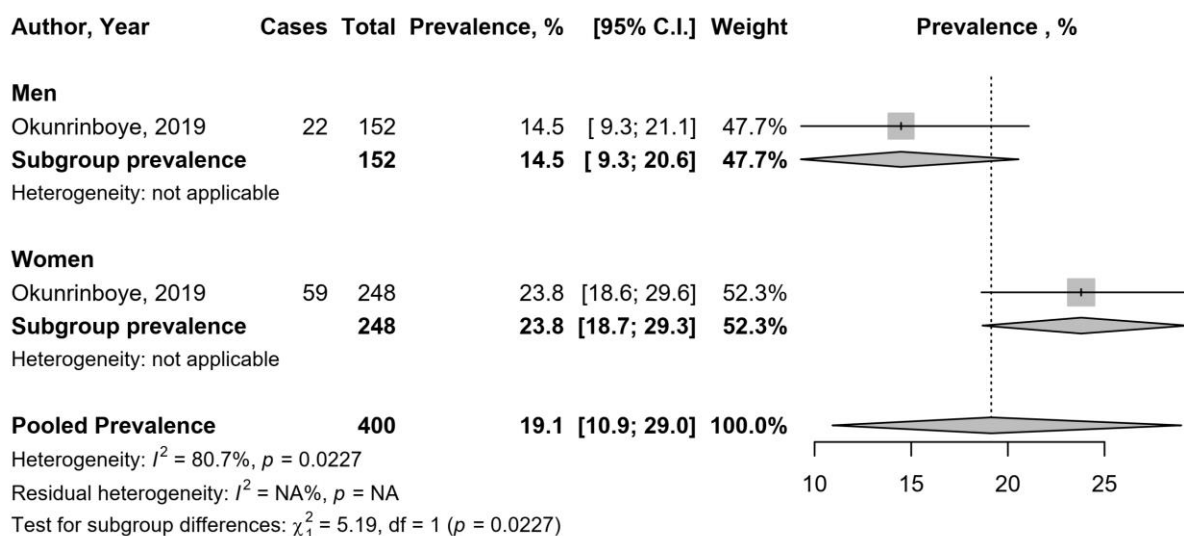

Supplementary Figure 6. Meta-analysis prevalence of depressive symptoms by sex

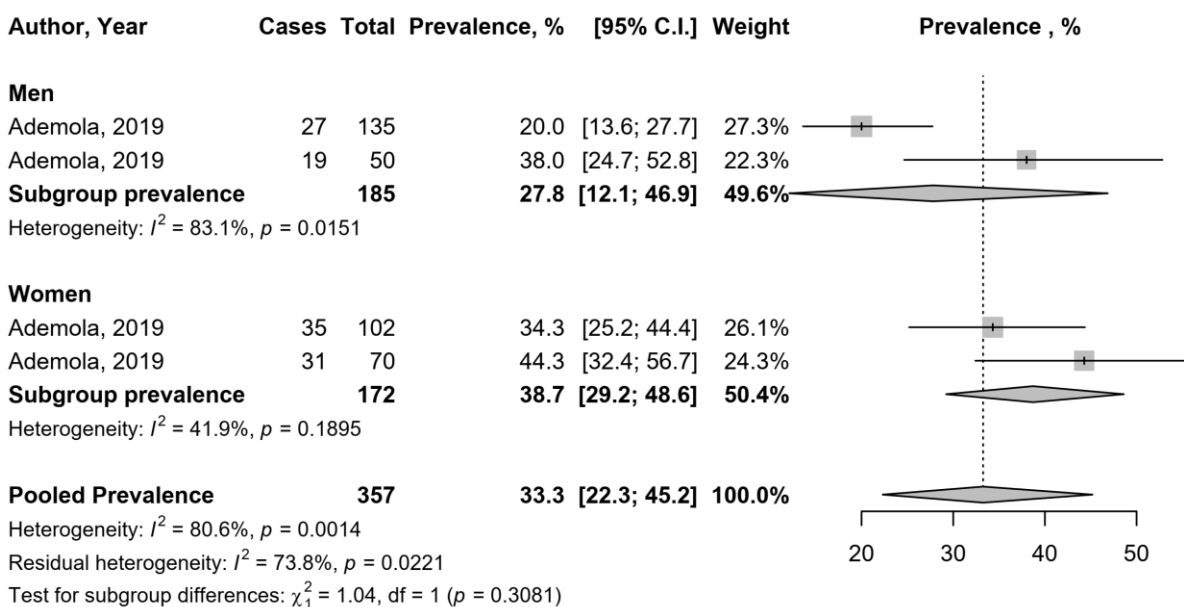



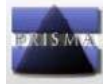

# PRISMA 2009 Checklist

| Section/topic                      | #  | Checklist item                                                                                                                                                                                                                                                                                              | Reported on page # |
|------------------------------------|----|-------------------------------------------------------------------------------------------------------------------------------------------------------------------------------------------------------------------------------------------------------------------------------------------------------------|--------------------|
| <b>TITLE</b>                       |    |                                                                                                                                                                                                                                                                                                             |                    |
| Title                              | 1  | Identify the report as a systematic review, meta-analysis, or both.                                                                                                                                                                                                                                         | 1                  |
| <b>ABSTRACT</b>                    |    |                                                                                                                                                                                                                                                                                                             |                    |
| Structured summary                 | 2  | Provide a structured summary including, as applicable: background; objectives; data sources; study eligibility criteria, participants, and interventions; study appraisal and synthesis methods; results; limitations; conclusions and implications of key findings; systematic review registration number. | 2                  |
| <b>INTRODUCTION</b>                |    |                                                                                                                                                                                                                                                                                                             |                    |
| Rationale                          | 3  | Describe the rationale for the review in the context of what is already known.                                                                                                                                                                                                                              | 5-6                |
| Objectives                         | 4  | Provide an explicit statement of questions being addressed with reference to participants, interventions, comparisons, outcomes, and study design (PICOS).                                                                                                                                                  | 6                  |
| <b>METHODS</b>                     |    |                                                                                                                                                                                                                                                                                                             |                    |
| Protocol and registration          | 5  | Indicate if a review protocol exists, if and where it can be accessed (e.g., Web address), and, if available, provide registration information including registration number.                                                                                                                               | 6                  |
| Eligibility criteria               | 6  | Specify study characteristics (e.g., PICOS, length of follow-up) and report characteristics (e.g., years considered, language, publication status) used as criteria for eligibility, giving rationale.                                                                                                      | 6-7                |
| Information sources                | 7  | Describe all information sources (e.g., databases with dates of coverage, contact with study authors to identify additional studies) in the search and date last searched.                                                                                                                                  | 7                  |
| Search                             | 8  | Present full electronic search strategy for at least one database, including any limits used, such that it could be repeated.                                                                                                                                                                               | 7, Appendix        |
| Study selection                    | 9  | State the process for selecting studies (i.e., screening, eligibility, included in systematic review, and, if applicable, included in the meta-analysis).                                                                                                                                                   | 7                  |
| Data collection process            | 10 | Describe method of data extraction from reports (e.g., piloted forms, independently, in duplicate) and any processes for obtaining and confirming data from investigators.                                                                                                                                  | 7-8                |
| Data items                         | 11 | List and define all variables for which data were sought (e.g., PICOS, funding sources) and any assumptions and simplifications made.                                                                                                                                                                       | 7-8                |
| Risk of bias in individual studies | 12 | Describe methods used for assessing risk of bias of individual studies (including specification of whether this was done at the study or outcome level), and how this information is to be used in any data synthesis.                                                                                      | 8                  |
| Summary measures                   | 13 | State the principal summary measures (e.g., risk ratio, difference in means).                                                                                                                                                                                                                               | 8                  |
| Synthesis of results               | 14 | Describe the methods of handling data and combining results of studies, if done, including measures of consistency (e.g., $I^2$ ) for each meta-analysis.                                                                                                                                                   | 8                  |

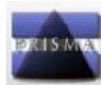

# PRISMA 2009 Checklist

Page 1 of 2

| Section/topic                 | #  | Checklist item                                                                                                                                                                                           | Reported on page # |
|-------------------------------|----|----------------------------------------------------------------------------------------------------------------------------------------------------------------------------------------------------------|--------------------|
| Risk of bias across studies   | 15 | Specify any assessment of risk of bias that may affect the cumulative evidence (e.g., publication bias, selective reporting within studies).                                                             | 8                  |
| Additional analyses           | 16 | Describe methods of additional analyses (e.g., sensitivity or subgroup analyses, meta-regression), if done, indicating which were pre-specified.                                                         | 8                  |
| <b>RESULTS</b>                |    |                                                                                                                                                                                                          |                    |
| Study selection               | 17 | Give numbers of studies screened, assessed for eligibility, and included in the review, with reasons for exclusions at each stage, ideally with a flow diagram.                                          | 9                  |
| Study characteristics         | 18 | For each study, present characteristics for which data were extracted (e.g., study size, PICOS, follow-up period) and provide the citations.                                                             | 9                  |
| Risk of bias within studies   | 19 | Present data on risk of bias of each study and, if available, any outcome level assessment (see item 12).                                                                                                | 9, Appendix        |
| Results of individual studies | 20 | For all outcomes considered (benefits or harms), present, for each study: (a) simple summary data for each intervention group (b) effect estimates and confidence intervals, ideally with a forest plot. | 9, Table 1         |
| Synthesis of results          | 21 | Present results of each meta-analysis done, including confidence intervals and measures of consistency.                                                                                                  | 9-10               |
| Risk of bias across studies   | 22 | Present results of any assessment of risk of bias across studies (see Item 15).                                                                                                                          | 9-10               |
| Additional analysis           | 23 | Give results of additional analyses, if done (e.g., sensitivity or subgroup analyses, meta-regression [see Item 16]).                                                                                    | 9-10               |
| <b>DISCUSSION</b>             |    |                                                                                                                                                                                                          |                    |
| Summary of evidence           | 24 | Summarize the main findings including the strength of evidence for each main outcome; consider their relevance to key groups (e.g., healthcare providers, users, and policy makers).                     | 10                 |
| Limitations                   | 25 | Discuss limitations at study and outcome level (e.g., risk of bias), and at review-level (e.g., incomplete retrieval of identified research, reporting bias).                                            | 12                 |
| Conclusions                   | 26 | Provide a general interpretation of the results in the context of other evidence, and implications for future research.                                                                                  | 12                 |
| <b>FUNDING</b>                |    |                                                                                                                                                                                                          |                    |
| Funding                       | 27 | Describe sources of funding for the systematic review and other support (e.g., supply of data); role of funders for the systematic review.                                                               | 13                 |

41

42 From: Moher D, Liberati A, Tetzlaff J, Altman DG, The PRISMA Group (2009). Preferred Reporting Items for Systematic Reviews and Meta-Analyses: The PRISMA Statement. PLoS Med 6(7): e1000097.  
 43 doi:10.1371/journal.pmed1000097

44

For more information, visit: [www.prisma-statement.org](http://www.prisma-statement.org).

45

For peer review only - <http://bmjopen.bmj.com/site/about/guidelines.xhtml>

46

47

# BMJ Open

## Epidemiology of depressive disorders in people living with hypertension in Africa: a systematic review and meta-analysis

|                                 |                                                                                                                                                                                                                                                                                                                                                                                                                                                                      |
|---------------------------------|----------------------------------------------------------------------------------------------------------------------------------------------------------------------------------------------------------------------------------------------------------------------------------------------------------------------------------------------------------------------------------------------------------------------------------------------------------------------|
| Journal:                        | <i>BMJ Open</i>                                                                                                                                                                                                                                                                                                                                                                                                                                                      |
| Manuscript ID                   | bmjopen-2020-037975.R2                                                                                                                                                                                                                                                                                                                                                                                                                                               |
| Article Type:                   | Original research                                                                                                                                                                                                                                                                                                                                                                                                                                                    |
| Date Submitted by the Author:   | 12-Nov-2020                                                                                                                                                                                                                                                                                                                                                                                                                                                          |
| Complete List of Authors:       | Endomba Angong, Francky Teddy; Health Economics and Policy Research and Evaluation for Development Results Group, Health Economics and Policy Research and Evaluation for Development Results Group; Université de Bourgogne, Psychiatry Internship Program<br>Mazou, Temgoua Ngou ; Health Economics and Policy Research and Evaluation for Development Results Group<br>Bigna, Jean Joel; Centre Pasteur du Cameroun, Department of Epidemiology and Public Health |
| <b>Primary Subject Heading</b>: | Mental health                                                                                                                                                                                                                                                                                                                                                                                                                                                        |
| Secondary Subject Heading:      | Cardiovascular medicine                                                                                                                                                                                                                                                                                                                                                                                                                                              |
| Keywords:                       | Depression & mood disorders < PSYCHIATRY, Hypertension < CARDIOLOGY, EPIDEMIOLOGY                                                                                                                                                                                                                                                                                                                                                                                    |
|                                 |                                                                                                                                                                                                                                                                                                                                                                                                                                                                      |

SCHOLARONE™  
Manuscripts



I, the Submitting Author has the right to grant and does grant on behalf of all authors of the Work (as defined in the below author licence), an exclusive licence and/or a non-exclusive licence for contributions from authors who are: i) UK Crown employees; ii) where BMJ has agreed a CC-BY licence shall apply, and/or iii) in accordance with the terms applicable for US Federal Government officers or employees acting as part of their official duties; on a worldwide, perpetual, irrevocable, royalty-free basis to BMJ Publishing Group Ltd ("BMJ") its licensees and where the relevant Journal is co-owned by BMJ to the co-owners of the Journal, to publish the Work in this journal and any other BMJ products and to exploit all rights, as set out in our [licence](#).

The Submitting Author accepts and understands that any supply made under these terms is made by BMJ to the Submitting Author unless you are acting as an employee on behalf of your employer or a postgraduate student of an affiliated institution which is paying any applicable article publishing charge ("APC") for Open Access articles. Where the Submitting Author wishes to make the Work available on an Open Access basis (and intends to pay the relevant APC), the terms of reuse of such Open Access shall be governed by a Creative Commons licence – details of these licences and which [Creative Commons](#) licence will apply to this Work are set out in our licence referred to above.

Other than as permitted in any relevant BMJ Author's Self Archiving Policies, I confirm this Work has not been accepted for publication elsewhere, is not being considered for publication elsewhere and does not duplicate material already published. I confirm all authors consent to publication of this Work and authorise the granting of this licence.

1  
2  
3 1 **Epidemiology of depressive disorders in people living with hypertension in**  
4  
5  
6 2 **Africa: a systematic review and meta-analysis**  
7  
8  
9 3

10  
11 4 Francky Teddy **Endomba**,<sup>1,2</sup> Mazou N. **Temgoua**,<sup>1</sup> Jean Joel **Bigna**<sup>3\*</sup>  
12  
13 5

- 14  
15 6 1. Health Economics and Policy Research and Evaluation for Development Results Group,  
16 7 Yaoundé, Cameroon  
17  
18 8 2. Psychiatry Internship Program, University of Bourgogne, 21000 Dijon, France.  
19  
20 9 3. Department of Epidemiology and Public Health, Centre Pasteur du Cameroon, Yaoundé,  
21 10 Cameroon  
22  
23 11

24  
25 12 E-mail addresses: FTE (franckytddyea@gmail.com); MNT (neurotemgoua@yahoo.fr); JJB  
26 13 (bignarimjj@yahoo.fr)  
27

28  
29 14 \*Corresponding author  
30  
31  
32 15

33  
34 16 **Word count:** 2,790; Abstract: 297 words  
35  
36  
37  
38  
39  
40  
41  
42  
43  
44  
45  
46  
47  
48  
49  
50  
51  
52  
53  
54  
55  
56  
57  
58  
59  
60

## 17 **Abstract**

18 **Objectives:** Better knowledge of epidemiology of depressive disorders in people living with  
19 hypertension can help to implement pertinent strategies to address its burden. The objective was  
20 to estimate the prevalence of depressive disorders and symptoms in people living with  
21 hypertension in Africa.

22 **Design:** Systematic review and meta-analysis.

23 **Data sources:** PubMed, EMBASE, African Index Medicus, Africa Journal Online were  
24 searched up to January 31, 2020; regardless of the language of publication.

25 **Eligibility criteria:** We included studies conducted among hypertensive adult patients ( $\geq 18$   
26 years) living in Africa and reporting the prevalence of depressive disorders and symptoms.

27 **Data extraction and synthesis:** Two independent investigators selected studies, extracted data,  
28 and assessed the methodological quality of included studies by using the tool developed by  
29 Joanna Briggs Institute. Multivariate random-effects meta-analysis served to pool data by  
30 considering the variability between diagnostic tools used to identify patients with depressive  
31 disorders or symptoms.

32 **Results:** We included 11 studies with 5,299 adults with hypertension. Data were collected  
33 between 2002 and 2017, from South Africa, Nigeria, Ghana, Ethiopia, and Burkina-Faso. The  
34 mean age varied between 50.3 and 59.6 years. The proportion of males ranged from 28% to  
35 54%. The adjusted prevalence of depressive disorders taking into account the variance between  
36 diagnostic tools was 17.9% (95% confidence interval [CI]: 13.0-23.4). The prevalence of  
37 depressive symptoms and major depressive symptoms was 33.3% (95%CI: 9.9-61.6) and 7.8%  
38 (95%CI: 3.0-14.5). There was heterogeneity attributable to the diagnostic tools for depressive  
39 disorders and symptoms. There was no publication bias.

40

1  
2  
3 41 **Conclusion:** Notwithstanding the representativeness lack of some (sub) regions of Africa,  
4  
5 42 weakening the generalizability of findings to the entire region; depressive disorders and  
6  
7 43 symptoms are prevalent in people living with hypertension in Africa, indicating that strategies  
8  
9 44 from clinicians, researchers, and public health makers are needed to reduce its burden in the  
10  
11 45 region.  
12  
13  
14  
15 46  
16  
17 47  
18  
19 48  
20  
21  
22 49 **Keywords**  
23  
24 50 Depression; Depressive symptoms; Depressive disorders; Hypertension; Africa  
25  
26  
27  
28  
29  
30  
31  
32  
33  
34  
35  
36  
37  
38  
39  
40  
41  
42  
43  
44  
45  
46  
47  
48  
49  
50  
51  
52  
53  
54  
55  
56  
57  
58  
59  
60

### Keywords

Depression; Depressive symptoms; Depressive disorders; Hypertension; Africa

## 51 **Strengths and Limitations of this study**

- 52 • Not all sub-regions of Africa were represented in this review.
- 53 • This is the first review performed among people living with hypertension Africa to  
54 investigate the epidemiology of depressive disorders and symptoms.
- 55 • We found a huge heterogeneity between studies explained by the difference between  
56 diagnostic tools for depressive disorders.
- 57 • We were not able to explore all sources of heterogeneity due to scarcity of epidemiological  
58 data.



## 59 Introduction

60 Cardiovascular diseases (CVDs) are the leading cause of deaths worldwide with approximately  
61 18 million deaths per year [1]. Hypertension is involved in approximately 50% of CVDs [2–4].  
62 According to the World Health Organization (WHO), the number of people living with  
63 hypertension worldwide is estimated at 1.13 billion, and Africa has the highest prevalence of  
64 people with hypertension (27%) [4]. In addition to high morbidity and mortality, hypertension  
65 is also associated with high socio-economic burden related to its management and  
66 complications [5–7]. Detrimental outcomes related to chronic high blood pressure encompass  
67 target organ damage involving cerebrovascular, heart, and kidney diseases [4,5]; but also,  
68 mental health repercussions including anxiety, stress and depression [8–10].  
69 Depressive disorder is the most common mental health disease and the second cause of  
70 disability worldwide after cardiovascular diseases [11,12]. It accounts for 3% of the global  
71 disability adjusted life years (DALYs) [12]. According to the WHO, depressive disorder affects  
72 more than 300 million people (4.4% of the global population), and its prevalence in the African  
73 continent is estimated at 9% (29.9 million of cases) in the general population [13]. Some  
74 subpopulations have been identified as higher risk of depression, including patients with  
75 chronic CVDs such as hypertension [9,14]. A wide range of previously published studies  
76 addressed the interaction between hypertension and depression [8,10,15,16]. Most of these  
77 studies concluded that hypertension and depressive disorder share bidirectional interplay where  
78 patients with hypertension were more likely to develop depression and conversely [8,17]. As  
79 examples of evidence, a meta-analysis of 41 studies (including 31 studies from China and three  
80 from Africa) which included 30,796 patients with hypertension found that 26.8% have  
81 depression, and another one which included 22,367 participants found that depression  
82 significantly increases the risk of hypertension incidence [10,15] Additionally, it has been  
83 reported that patients living with hypertension with comorbid depression are at higher risk of

1  
2  
3 84 suboptimal medication adherence with uncontrolled blood pressure, complicated by chronic  
4  
5 85 vascular complications and cardiovascular disease related mortality [8,10,15,16,18]. The  
6  
7 86 burden of the depression-hypertension co-occurrence is worsened by the fact that  
8  
9 87 approximately one hypertensive patient in ten has untreated depression [10,19].  
10  
11  
12 88 Considering up-to-date scientific literature, depression in hypertensive patients is common in  
13  
14 89 western contexts [10,20], hypertension and depression are commonly encountered amongst  
15  
16 90 African populations [2,4,13], but data summarizing and focusing on the burden of depression  
17  
18 91 among hypertensive Africans are not yet available. Hence, we conducted this systematic review  
19  
20 92 and meta-analysis with the aim to explore the prevalence of depressive disorders/symptoms,  
21  
22 93 and major depression in people living with hypertension in Africa.  
23  
24  
25  
26  
27

## 28 95 **Methods**

### 30 96 **Design**

31  
32  
33 97 This systematic review and meta-analysis was conducted according to the Joanna Briggs  
34  
35 98 Institute guidelines [21]. This study was reported according to the preferred reporting items for  
36  
37 99 systematic reviews and meta-analyses (PRISMA) guidelines [22]. The protocol of this review  
38  
39  
40 100 was registered in PROSPERO with the following registration number: CRD42020168979.

### 42 101 **Eligibility criteria**

#### 44 102 ***Condition***

45  
46  
47 103 We considered studies reporting the prevalence (or enough data to compute this estimate) of  
48  
49 104 depressive disorders and symptoms. We considered depressive disorders (and major depressive  
50  
51 105 disorders) diagnosed according to the Diagnostic and Statistical Manual of Mental Health  
52  
53 106 Disorders IV or V [23,24], or International Statistical Classification of Diseases and Related  
54  
55 107 Health Problems-10 [25]. In the studies where depressive disorders were not defined using the  
56  
57  
58 108 aforementioned criteria, we considered the definition used by authors, including especially  
59  
60

1  
2  
3 109 diagnostic scores such as the Patient Health Questionnaire-9. Major depressive symptoms  
4  
5 110 notably included depressive mood and anhedonia.  
6

### 7 111 ***Context***

8  
9  
10 112 We considered studies conducted in people living in Africa. Studies conducted in Africans  
11  
12 113 living outside Africa were not considered.  
13

### 14 114 ***Population***

15  
16  
17 115 We considered studies conducted in adults ( $\geq 18$  years) living with hypertension regardless of  
18  
19 116 the diagnosis criteria used, of the therapeutic regimen and the control status for the hypertensive  
20  
21 117 disease.  
22

### 23 118 ***Study design***

24  
25  
26 119 Cross-sectional, case-control, and cohort studies.  
27

### 28 120 **Data sources**

29  
30  
31 121 We searched PubMed, Excerpta Medica Database (EMBASE), Africa Index Medicus, and  
32  
33 122 Africa Journal Online to identify all relevant records published up to January 31<sup>st</sup>, 2020;-without  
34  
35 123 any language restriction. The search strategy in EMBASE is available in the Appendix  
36  
37 124 (Supplementary Table 1). To supplement the bibliographic database searches and identify  
38  
39 125 potential additional data sources, we scrutinized the reference list of all relevant original and  
40  
41 126 review papers.  
42  
43

### 44 127 **Study selection**

45  
46  
47 128 Titles and abstracts of articles retrieved from literature search were independently screened by  
48  
49 129 two investigators (FTE and JJB), and the full-texts of those potentially eligible were obtained  
50  
51 130 and further assessed for final inclusion. Disagreements were resolved through consensus.  
52

### 53 131 **Data collection and management**

54  
55  
56 132 A preconceived and standardized data extraction form was used to collect information on first  
57  
58 133 author's name, study country, year of publication, period of participants' recruitment, study  
59  
60

1  
2  
3 134 design, setting, sampling method, timing of data collection, response rate, mean or median age  
4  
5 135 of the population, age range, proportion of males, number of participants with hypertension, the  
6  
7 136 number of participants with depressive disorders. In case of multinational studies, data were  
8  
9  
10 137 separated to show the estimate within individual countries. Two investigators (FTE and JJB)  
11  
12 138 independently extracted the data from individual studies, with disagreements being resolved  
13  
14 139 through consensus.

16  
17 140 Two investigators (FTE and JJB) independently assessed study methodological quality of  
18  
19 141 included studies with tool developed by Joanna Briggs Institute [21], with disagreements being  
20  
21 142 resolved through discussion and consensus. Risk of bias was considered low for each criterion  
22  
23 143 if studies used probabilistic sampling, prospectively collected data, had adequate sample size  
24  
25 144 (required sample size attained), response rate > 80%, and same method of data collection for  
26  
27 145 participants. Studies with low risk of bias had to have four or more criteria, two or three for  
28  
29 146 moderate risk of bias, and no or one for low risk of bias.

### 32 33 147 **Data synthesis and analysis**

35 148 Meta-analyses were performed with the '*meta*', '*metafor*', and '*dmetar*' packages of the  
36  
37 149 statistical software *R* (version 3.6.2). Prevalence estimates were reported with 95% confidence  
38  
39 150 interval (95%CI). Prevalence pooling was done with Freeman-Tukey double arcsine  
40  
41 151 transformation using random-effects meta-analysis model [26]. We adjusted the prevalence in  
42  
43 152 a multivariate meta-analysis to take in account the variance between tools used to identify  
44  
45 153 patients with depressive disorders/symptoms. Egger's test served for detecting the presence of  
46  
47 154 publication bias [27]. A p-value < 0.10 on Egger test was considered indicative of statistically  
48  
49 155 significant publication bias. Heterogeneity was evaluated by the  $\chi^2$  test on Cochran's Q statistic  
50  
51 156 [28], which was quantified by  $I^2$  values. The  $I^2$  statistic estimates the percentage of total  
52  
53 157 variation across studies due to true between-study differences rather than chance. In general,  $I^2$   
54  
55 158 values greater than 60-70% indicate the presence of substantial heterogeneity [29]. Inter-rater  
56  
57  
58  
59  
60

1  
2  
3 159 agreements between investigators for study inclusion and methodological quality assessment  
4  
5 160 were assessed using Kappa Cohen's coefficient [30].  
6  
7

## 8 161 **Patient and public involvement**

9  
10 162 Patients or the public were not involved in the design, conduct, reporting, or dissemination of  
11  
12 163 our research.  
13  
14  
15 164

## 16 165 **Results**

### 17 166 **The review process and study characteristics**

18  
19  
20 167 We initially identified 890 records and finally retained 11 full texts (13 prevalence data) in the  
21  
22 168 meta-analysis (Supplementary Figure 1) [31–41]. Agreement between investigators on  
23  
24 169 selection based on title and abstract was  $\kappa = 0.88$  and  $\kappa = 1.0$  for final inclusion.  
25  
26  
27

28  
29 170 Of the 11 included studies, eight studies used non-probabilistic sampling while three used  
30  
31 171 probabilistic sampling. All studies prospectively collected and analysed data and used the same  
32  
33 172 method to identify patients with depressive disorders. Sample size was adequate in nine studies  
34  
35 173 and response rate in two studies (Supplementary Table 2). Three studies had low risk of bias  
36  
37 174 and eight moderate risk. None of the studies had high risk of bias.  
38  
39

40 175 The characteristics of included studies are presented in the Table 1. All studies were cross-  
41  
42 176 sectional. Patient Health Questionnaire-9 was the most used tool,  $n = 4$ . The mean age varied  
43  
44 177 between 50.3 and 59.6 years. The proportion of males varied between 28% and 54%. Data on  
45  
46 178 depressive disorders/symptoms were collected between 2002 and 2017. Four studies were  
47  
48 179 conducted in South Africa, three studies in Nigeria, one study in Ghana, one study in both  
49  
50 180 Ghana and Nigeria, one study in Ethiopia, and one study in Burkina-Faso. None of the study  
51  
52 181 was conducted in Central Africa and North Africa. Talking about the language of the tool used  
53  
54 182 to assess depressive status, four studies indicated that they use native/local languages back  
55  
56 183 translated in English for reporting [32,33,35,36].  
57  
58  
59  
60

## 184 **Prevalence of depressive disorders/symptoms in people with hypertension in Africa**

185 In total, 5,299 participants with hypertension were included. There was substantial  
186 heterogeneity for all analyses, all  $I^2 > 75\%$  (Figure 1). The prevalence of depressive disorders  
187 was 18.6% (95%CI: 13.8-23.9; 5 studies) (Figure 1). The adjusted prevalence taking into  
188 account the variance between diagnostic tools was 17.9% (95%CI: 13.0-23.4) with 52.7% of  
189 variance due to difference between tools. There was no publication bias ( $p = 0.789$ ). There was  
190 no data on major depressive disorders.

191 The prevalence of depressive symptoms was 37.3% (95%CI: 19.3-57.3; 6 studies). The adjusted  
192 prevalence taking into account the variance between diagnostic tools was 33.3% (95%CI: 9.9-  
193 61.6) with 74.1% of variance due to difference between tools. There was no publication bias ( $p$   
194 = 0.115).

195 The prevalence of major depressive symptoms was 7.9% (95%CI: 1.7-17.9; 2 studies). The  
196 adjusted prevalence taking into account the variance between diagnostic tools was 7.8%  
197 (95%CI: 3.0-14.5) with 43.3% of variance due to difference between tools. The  $p$  value on  
198 Egger test was 0.789.

199 In subgroup analysis, there was no difference between population-based and hospital-based for  
200 all outcomes except for major depressive disorders where the prevalence was higher in  
201 population-based study (12.6%; 95%CI: 8.8-17.0; 1 study) compared to hospital-based study  
202 (4.2%; 95%CI: 2.5-6.5; 1 study),  $p = 0.0001$  (Supplementary Figures 2, 3, and 4). However,  
203 there was low number of studies in compared groups. The prevalence of depressive disorders  
204 was higher among women (23.8%; 95%CI: 18.7-29.3; 1 study) compared to men (14.5%;  
205 95%CI: 9.3-20.6; 1 study),  $p = 0.0227$  (Supplementary Figure 5). There was no difference for  
206 depressive symptoms (Supplementary Figure 6).

## 208 **Discussion**

1  
2  
3 209 This meta-analysis of data from 5,299 adults with hypertension living in five countries in Africa  
4  
5 210 revealed that depressive disorders and symptoms are prevalent in this population with  
6  
7 211 substantial heterogeneity according to the diagnostic tools. This systematic review suggests that  
8  
9 212 approximately one on five and one-third of patients with hypertension have respectively  
10  
11 213 depression and depressive symptoms.

12  
13  
14 214 Globally, there are dissimilarities between our findings and previous studies on depression  
15  
16 215 among adults with hypertension. For instance, in China, a meta-analysis of 41 studies on the  
17  
18 216 prevalence of depression in patients with hypertension found higher rate of depression with a  
19  
20 217 pooled prevalence of 26.9% (95%CI: 21.7% - 32.3%) [10]. Our review revealed a higher  
21  
22 218 prevalence of depression among patients with hypertension compared to occidental studies. For  
23  
24 219 instance, considering data of United States Multi-Disciplinary Group Practice Observational  
25  
26 220 Study which included 4,362 adult patients with hypertension, 13% had anxiety and/or  
27  
28 221 depression [42]. A cross-sectional study done in Spain among 5,954 hypertensive patients with  
29  
30 222 high cardiovascular risk factors found that 15.6% of them had depression [19]. These  
31  
32 223 differences across regions can be explained by the changeability pertaining to the criteria and/or  
33  
34 224 diagnostic tools used to screen depressive disorder [43,44]. Noteworthy, Li and colleagues who  
35  
36 225 studied depressive disorder among patients with hypertension in a meta-analysis of 41 studies  
37  
38 226 suggested that self-assessed screening tools of depression or depressive symptoms might  
39  
40 227 overestimate the prevalence of depression [10]. Indeed, they found a 30% depression  
41  
42 228 prevalence using self-administrated diagnostic scales versus a 21% prevalence using clinical-  
43  
44 229 interviewed tools [10]. This could be linked to patients' confusion about symptoms possibly  
45  
46 230 encountered in both depression and hypertension such as poor appetite, fatigue and sleep  
47  
48 231 disturbances [10]. In our review, the most used diagnostic tool was the PHQ-9 and another fact  
49  
50 232 to highpoint is that differences in prevalence can also be explained by the cut-off-points used  
51  
52 233 for a same tool to define a positive screening for depression [32,45,46]. Mahmood and  
53  
54  
55  
56  
57  
58  
59  
60

1  
2  
3 234 colleagues while assessing depression among 411 hypertensive outpatients in a Pakistan  
4  
5 235 hospital by using PHQ-9 with a score of 10 or above as cut-off point found a prevalence of  
6  
7 236 40.1% [47], more than two folds compared to our findings. In our study, we had a substantial  
8  
9  
10 237 heterogeneity for all analyses which can also be related to the variance between diagnostic tools  
11  
12 238 used for depression assessment. The previously cited meta-analysis of Li and colleagues also  
13  
14 239 showed evidence of high-level heterogeneity due to diagnostic tools considered in original  
15  
16 240 studies [10].

17  
18  
19 241 In our sub-group analysis, we found that there was no difference between population-based and  
20  
21 242 hospital-based for all outcomes except for major depressive disorders which prevalence was  
22  
23 243 higher in population-based study. This result has to be cautiously interpreted regarding the  
24  
25 244 amount of studies in each group (only one study per group measured with depression  
26  
27 245 investigated with different tools). We also found that the prevalence of depressive disorders  
28  
29 246 was higher among women compared to men. This finding is in accordance with what is known  
30  
31 247 concerning gender differences in depression [48–50]. This can be linked to hormonal  
32  
33 248 differences between the two genders, and the fact that women experience periods of  
34  
35 249 physiological changes such as menstruation, pregnancy and perimenopause [49,51,52]. There  
36  
37 250 are growing evidence on the potential positive role of hormone replacement therapy on  
38  
39 251 postmenopausal depression [51,52]. This could be more pronounced in sub-Saharan African  
40  
41 252 cultures considering the role of male gender in families, with as consequence a lesser capacity  
42  
43 253 to express their psychological distress [53–55].

44  
45 254 This meta-analysis highlights the fact that depressive disorder is frequently encountered among  
46  
47 255 hypertensive patients compared to the general population. This review might substantiate the  
48  
49 256 relevancy to conduct further studies with the aim to investigate on the better diagnosis tool for  
50  
51 257 depression among hypertensive patients in order to reduce heterogeneity of results. Moreover,  
52  
53 258 our review could justify carrying out epidemiological studies on the depression-hypertension  
54  
55  
56  
57  
58  
59  
60



1  
2  
3 259 comorbidity in other African regions in order to have more representative regional picture of  
4  
5 260 the evidence. Since we were able to identify only 11 studies in the last 20 years our study calls  
6  
7 261 for more primary research on the relationship between hypertension and mental health in the  
8  
9 262 continent, by using homogenous diagnostic tools. Researchers, clinicians, and public health  
10  
11 263 policy makers can also explore implementing registries to better measure the burden of mental  
12  
13 264 health disorders in the continent [56–58]. All this might help to establish adapted policies  
14  
15 265 pertaining to the management of hypertensive patients with depression, notably for a tailored  
16  
17 266 pharmacological treatment [18,59,60]. Nevertheless, our analysis could already draw  
18  
19 267 clinician’s awareness on the necessity to screen depression symptoms among hypertensive  
20  
21 268 patients, especially since previously published works found that comorbid depression  
22  
23 269 contribute to more deleterious cardiovascular outcomes [8,10,15,16,18]. A meta-analysis of  
24  
25 270 prospective cohort studies suggested that people with depressive disorders had higher risk of  
26  
27 271 hypertension [61]. Therefore, implementing strategies to reduce the burden of depressive  
28  
29 272 disorders could help to reduce the prevalence of hypertension. Although pharmacological  
30  
31 273 interventions can help to reduce the burden of depressive disorders [62], cost-effective non-  
32  
33 274 pharmacological interventions should be explored first in a context of resources limited setting  
34  
35 275 like most of countries in Africa [63, 64].

36  
37 276 This study should however be interpreted considering some limitations. First and most common  
38  
39 277 to meta-analyses of prevalence studies [65], we found a huge heterogeneity between studies for  
40  
41 278 which we undertook subgroup analysis to investigate sources of heterogeneity and adjusted  
42  
43 279 analysis to take account the variance due to diagnostic tools. However, some characteristics that  
44  
45 280 may further explain heterogeneity were not reported or there were not enough studies to conduct  
46  
47 281 such analysis including sub-regions and age groups. Second, there was a substantial variability  
48  
49 282 regarding the representativeness of regions and countries, with some ones less or not  
50  
51 283 represented. This may weaken the generalizability of our findings and call for more  
52  
53  
54  
55  
56  
57  
58  
59  
60

1  
2  
3 284 epidemiological studies in this region. Not all studies had low risk of bias, especially, most of  
4  
5 285 studies used non-probabilistic sampling. However, due to low number of studies included in  
6  
7  
8 286 this meta-analysis, we were not able to perform sensitivity analysis to assess the robustness of  
9  
10 287 our findings based on methodological quality.

11  
12 288 Despite these limitations, this first systematic review and meta-analysis on depressive  
13  
14 289 disorders/symptoms in people living with hypertension in Africa provided a clear summary of  
15  
16  
17 290 the existing knowledge. This systematic review is a starting point for understanding the  
18  
19 291 epidemiology and relationship between mental health and hypertension in African countries  
20  
21 292 where it is challenging to have such data. A protocol had been registered before, and we used  
22  
23  
24 293 rigorous methodological and statistical procedures to obtain and pool data. Furthermore, we  
25  
26 294 have taken in account the variability due to diagnostic tools. There was no publication bias.

27  
28  
29 295

## 30 296 **Conclusions**

31  
32  
33 297 Overall, our review found that depressive disorders and symptoms are prevalent in people living  
34  
35 298 with hypertension in select African countries. Including an assessment of mental health in  
36  
37  
38 299 patients with hypertension seems prudent, with the potential for intervention. However, since  
39  
40 300 our analysis has limitations pertaining to diagnostic tools consistency within studies and also to  
41  
42 301 the unrepresentative geographic distribution, further studies would be relevant in order to  
43  
44  
45 302 reinforce our findings. All this could be a support for a personalized management of patients  
46  
47 303 with hypertension and depression.

48  
49  
50 304

## 51 305 **Author Contributors**

52  
53  
54 306 Conception: JJB, FTE. Design of the protocol: FTE, JJB. Literature search: JJB. Studies'  
55  
56 307 selection: FTE, JJB. Data extraction: FTE, JJB. Data management: JJB. Data synthesis and  
57  
58  
59  
60

1  
2  
3 308 analysis: JJB. Writing of the first draft: JJB, FTE. Critical revision: FTE, MNT, JJB. Approved  
4  
5 309 the final version: FTE, MNT, JJB. Guarantor of the review: JJB.  
6

### 7 310 **Acknowledgments**

9  
10 311 None.

### 12 312 **Funding**

14 313 This research received no specific grant from any funding agency in the public, commercial or  
15  
16 314 not-for-profit sectors.

### 19 315 **Competing interests**

21 316 We declare no competing interests.

### 24 317 **Patient consent**

26 318 Not applicable.

### 28 319 **Data sharing statement**

30 320 All data generated for this study are in the manuscript and its supporting files.  
31  
32 321

### 35 322 **References**

- 37  
38  
39 323 1. GBD 2015 Risk Factors Collaborators. Global, regional, and national comparative risk  
40 324 assessment of 79 behavioural, environmental and occupational, and metabolic risks or  
41 325 clusters of risks, 1990-2015: a systematic analysis for the Global Burden of Disease Study  
42 326 2015. *Lancet Lond Engl.* 2016;388(10053):1659-724.  
43  
44 327 2. Kearney PM, Whelton M, Reynolds K, Muntner P, Whelton PK, He J. Global burden of  
45 328 hypertension: analysis of worldwide data. *Lancet Lond Engl.* 2005;365(9455):217-23.  
46  
47 329 3. Lawes CMM, Vander Hoorn S, Rodgers A, International Society of Hypertension. Global  
48 330 burden of blood-pressure-related disease, 2001. *Lancet Lond Engl.* 2008;371(9623):1513-8.  
49  
50 331 4. World Health Organization (WHO). Hypertension. [https://www.who.int/news-room/fact-](https://www.who.int/news-room/fact-sheets/detail/hypertension)  
51 332 [sheets/detail/hypertension](https://www.who.int/news-room/fact-sheets/detail/hypertension). Date: 2019. Date accessed: February 16, 2019.  
52  
53 333 5. Zhou B, Danaei G, Stevens GA et al. Long-term and recent trends in hypertension  
54 334 awareness, treatment, and control in 12 high-income countries: an analysis of 123 nationally  
55 335 representative surveys. *The Lancet.* 2019;394(10199):639-51.  
56  
57 336 6. Arima H, Barzi F, Chalmers J. Mortality patterns in hypertension. *J Hypertens.* 2011;29  
58 337 Suppl 1:S3-7.

- 338 7. Zhang D, Wang G, Zhang P, Fang J, Ayala C. Medical Expenditures Associated With  
339 Hypertension in the U.S., 2000–2013. *Am J Prev Med.* 2017;53(6 Suppl 2):S164-71.
- 340 8. Scalco AZ, Scalco MZ, Azul JBS, Lotufo Neto F. Hypertension and depression. *Clin Sao*  
341 *Paulo Braz.* 2005;60(3):241-50.
- 342 9. Ngo VK, Rubinstein A, Ganju V et al. Grand Challenges: Integrating Mental Health Care  
343 into the Non-Communicable Disease Agenda. *PLOS Med.* 2013;10(5):e1001443.
- 344 10. Li Z, Li Y, Chen L, Chen P, Hu Y. Prevalence of Depression in Patients With Hypertension.  
345 *Medicine (Baltimore).* 2015;94(31):e1317.
- 346 11. Rehm J, Shield KD. Global Burden of Disease and the Impact of Mental and Addictive  
347 Disorders. *Curr Psychiatry Rep.* 2019;21(2):10.
- 348 12. Ferrari AJ, Charlson FJ, Norman RE et al. Burden of depressive disorders by country, sex,  
349 age, and year: findings from the global burden of disease study 2010. *PLoS Med.*  
350 2013;10(11):e1001547.
- 351 13. World Health Organization. Depression and Other Common Mental Disorders. Geneva:  
352 World Health Organization; 2017.
- 353 14. Schaakxs R, Comijs HC, van der Mast RC, Schoevers RA, Beekman ATF, Penninx BWJH.  
354 Risk Factors for Depression: Differential Across Age? *Am J Geriatr Psychiatry.*  
355 2017;25(9):966-77.
- 356 15. Meng L, Chen D, Yang Y, Zheng Y, Hui R. Depression increases the risk of hypertension  
357 incidence: a meta-analysis of prospective cohort studies. *J Hypertens.* 2012;30(5):842-51.
- 358 16. Song X, Zhang Z, Zhang R et al. Predictive markers of depression in hypertension. *Medicine*  
359 *(Baltimore).* 2018;97(32):e11768.
- 360 17. Sandström YK, Ljunggren G, Wändell P, Wahlström L, Carlsson AC. Psychiatric  
361 comorbidities in patients with hypertension--a study of registered diagnoses 2009-2013 in  
362 the total population in Stockholm County, Sweden. *J Hypertens.* 2016;34(3):414-20;  
363 discussion 420.
- 364 18. Graham N, Ward J, Mackay D et al. Impact of major depression on cardiovascular outcomes  
365 for individuals with hypertension: prospective survival analysis in UK Biobank. *BMJ Open.*  
366 2019;9:e024433.
- 367 19. Mejia-Lancheros C, Estruch R, Martínez-González MA et al. Blood pressure values and  
368 depression in hypertensive individuals at high cardiovascular risk. *BMC Cardiovasc*  
369 *Disord.* 2014;14(1):109.
- 370 20. Xue J, Chen S, Bogner HR, Tang W, Li L, Conwell Y. The prevalence of depressive  
371 symptoms among older patients with hypertension in rural China. *Int J Geriatr Psychiatry.*  
372 2017;32(12):1411-7.
- 373 21. Munn Z, Moola S, Lisy K, et al. Chapter 5: Systematic reviews of prevalence and incidence.  
374 In: Aromataris E, Munn Z, eds. *JBIM Manual for Evidence Synthesis.* Adelaide: The Joanna  
375 Briggs Institute 2020. p 175-215.

- 1  
2  
3 376 22. Liberati A, Altman DG, Tetzlaff J, et al. The PRISMA statement for reporting systematic  
4 377 reviews and meta-analyses of studies that evaluate healthcare interventions: explanation and  
5 378 elaboration. *BMJ* 2009;339:b2700-b00. doi: 10.1136/bmj.b2700  
6  
7 379 23. Association AP, Staff APA, DSM-IV APATF on. Diagnostic and Statistical Manual of  
8 380 Mental Disorders, Fourth Edition: DSM-IV-TR®. American Psychiatric Association; 2000.  
9 381 996 p.  
10  
11 382 24. Association AP. Diagnostic and Statistical Manual of Mental Disorders (DSM-5®).  
12 383 American Psychiatric Pub; 2013. 1414 p.  
13  
14 384 25. WHO, Organization WH, Staff WHO. The ICD-10 Classification of Mental and  
15 385 Behavioural Disorders: Clinical Descriptions and Diagnostic Guidelines. World Health  
16 386 Organization; 1992. 377 p.  
17  
18 387 26. Barendregt JJ, Doi SA, Lee YY, et al. Meta-analysis of prevalence. *Journal of epidemiology*  
19 388 *and community health* 2013;67(11):974-8. doi: 10.1136/jech-2013-203104 [published  
20 389 Online First: 2013/08/22]  
21  
22 390 27. Egger M, Davey Smith G, Schneider M, et al. Bias in meta-analysis detected by a simple,  
23 391 graphical test. *BMJ (Clinical research ed)* 1997;315(7109):629-34. [published Online First:  
24 392 1997/10/06]  
25  
26 393 28. Cochran WG. The Combination of Estimates from Different Experiments. *Biometrics*  
27 394 1954;10(1):101-29.  
28  
29 395 29. Higgins JP, Thompson SG. Quantifying heterogeneity in a meta-analysis. *Statistics in*  
30 396 *medicine* 2002;21(11):1539-58. doi: 10.1002/sim.1186 [published Online First:  
31 397 2002/07/12]  
32  
33 398 30. Viera AJ, Garrett JM. Understanding interobserver agreement: the kappa statistic. *Family*  
34 399 *medicine* 2005;37(5):360-3. [published Online First: 2005/05/11]  
35  
36 400 31. Igwe MN, Uwakwe R, Ahanotu CA, et al. Factors associated with depression and suicide  
37 401 among patients with diabetes mellitus and essential hypertension in a Nigerian teaching  
38 402 hospital. *African Health Sciences* 2013;13(1):68-77. doi: 10.4314/ahs.v13i1.10  
39  
40 403 32. Bhana A, Rathod SD, Selohilwe O, et al. The validity of the Patient Health Questionnaire  
41 404 for screening depression in chronic care patients in primary health care in South Africa.  
42 405 *BMC Psychiatry* 2015;15(1) doi: 10.1186/s12888-015-0503-0  
43  
44 406 33. Umer H, Negash A, Birkie M, et al. Determinates of depressive disorder among adult  
45 407 patients with cardiovascular disease at outpatient cardiac clinic Jimma University Teaching  
46 408 Hospital, South West Ethiopia: Cross-sectional study. *International Journal of Mental*  
47 409 *Health Systems* 2019;13(1) doi: 10.1186/s13033-019-0269-8  
48  
49 410 34. Kretchy IA, Owusu-Daaku FT, Danquah SA. Mental health in hypertension: Assessing  
50 411 symptoms of anxiety, depression and stress on anti-hypertensive medication adherence.  
51 412 *International Journal of Mental Health Systems* 2014;8(1) doi: 10.1186/1752-4458-8-25  
52  
53  
54  
55  
56  
57  
58  
59  
60

- 1  
2  
3 413 35. Hamer M, Frasura-Smith N, Lespérance F, et al. Depressive symptoms and 24-hour  
4 414 ambulatory blood pressure in Africans: The SABPA study. *International Journal of*  
5 415 *Hypertension* 2012;2012 doi: 10.1155/2012/426803  
6  
7 416 36. Geldsetzer P, Vaikath M, Wagner R, et al. Depressive Symptoms and Their Relation to Age  
8 417 and Chronic Diseases Among Middle-Aged and Older Adults in Rural South Africa. *The*  
9 418 *journals of gerontology Series A, Biological sciences and medical sciences* 2019;74(6):957-  
10 419 63. doi: 10.1093/gerona/gly145  
11  
12  
13 420 37. Ademola AD, Boima V, Odusola AO, et al. Prevalence and determinants of depression  
14 421 among patients with hypertension: A cross-sectional comparison study in Ghana and  
15 422 Nigeria. *Nigerian journal of clinical practice* 2019;22(4):558-65. doi:  
16 423 10.4103/njcp.njcp\_351\_18  
17  
18 424 38. Iloh GUP, Aguocha GU, Amadi AN, et al. Depression among ambulatory adult patients in  
19 425 a primary care clinic in southeastern Nigeria. *The Nigerian postgraduate medical journal*  
20 426 2018;25(4):204-12. doi: 10.4103/npmj.npmj\_107\_18  
21  
22  
23 427 39. Okunrinboye HI, Otakpor AN, Ilesanmi OS. Depression and medication-adherence in  
24 428 patients with hypertension attending a tertiary health facility in South-West Nigeria. *Pan*  
25 429 *African Medical Journal* 2019;33 doi: 10.11604/pamj.2019.33.27.12941  
26  
27 430 40. Grimsrud A, Stein DJ, Seedat S, et al. The association between hypertension and depression  
28 431 and anxiety disorders: Results from a nationally-representative sample of South African  
29 432 adults. *PLoS ONE* 2009;4(5) doi: 10.1371/journal.pone.0005552  
30  
31 433 41. Yaméogo NV, Samadoulougou A, Kagambèga LJ, et al. Sleep disorders, anxiety and  
32 434 depressive symptoms and cardiovascular risk among hypertensive black Africans: Cross-  
33 435 sectional study of 414 hypertensive followed as outpatients at the Central University  
34 436 Hospital of Ouagadougou (Burkina Faso). *Pan African Medical Journal* 2015;21:185-96.  
35 437 doi: 10.11604/pamj.2015.21.115.5219  
36  
37  
38 438 42. Ho AK, Thorpe CT, Pandhi N, Palta M, Smith MA, Johnson HM. Association of anxiety  
39 439 and depression with hypertension control: a US multidisciplinary group practice  
40 440 observational study. *J Hypertens.* 2015;33(11):2215-22.  
41  
42  
43 441 43. Levis B, Yan XW, He C, Sun Y, Benedetti A, Thombs BD. Comparison of depression  
44 442 prevalence estimates in meta-analyses based on screening tools and rating scales versus  
45 443 diagnostic interviews: a meta-research review. *BMC Med.* 2019;17:65.  
46  
47 444 44. De Joode JW, van Dijk SEM, Walburg FS et al. Diagnostic accuracy of depression  
48 445 questionnaires in adult patients with diabetes: A systematic review and meta-analysis. *PLoS*  
49 446 *ONE.* 2019;14(6):e0218512.  
50  
51 447 45. Manea L, Gilbody S, McMillan D. Optimal cut-off score for diagnosing depression with  
52 448 the Patient Health Questionnaire (PHQ-9): a meta-analysis. *CMAJ Can Med Assoc J.*  
53 449 2012;184(3):E191-6.  
54  
55 450 46. Levis B, Benedetti A, Thombs BD. Accuracy of Patient Health Questionnaire-9 (PHQ-9)  
56 451 for screening to detect major depression: individual participant data meta-analysis. *BMJ.*  
57 452 2019;365:11476.  
58  
59  
60

- 1  
2  
3 453 47. Mahmood S, Hassan SZ, Tabraze M et al. Prevalence and Predictors of Depression  
4 454 Amongst Hypertensive Individuals in Karachi, Pakistan. *Cureus*. 2017;9(6):e1397.  
5 455  
6 456 48. Abate KH. Gender Disparity in Prevalence of Depression Among Patient Population: A  
7 457 Systematic Review. *Ethiop J Health Sci*. 2013;23(3):283-8.  
8  
9  
10 458 49. Salk RH, Hyde JS, Abramson LY. Gender Differences in Depression in Representative  
11 459 National Samples: Meta-Analyses of Diagnoses and Symptoms. *Psychol Bull*.  
12 460 2017;143(8):783-822.  
13  
14 461 50. Picco L, Subramaniam M, Abdin E, Vaingankar JA, Chong SA. Gender differences in major  
15 462 depressive disorder: findings from the Singapore Mental Health Study. *Singapore Med J*.  
16 463 2017;58(11):649-55.  
17  
18 464 51. Albert PR. Why is depression more prevalent in women? *J Psychiatry Neurosci JPN*.  
19 465 2015;40(4):219-21.  
20  
21  
22 466 52. Bromberger JT, Epperson CN. Depression During and After the Perimenopause: Impact of  
23 467 Hormones, Genetics, and Environmental Determinants of Disease. *Obstet Gynecol Clin*  
24 468 *North Am*. 2018;45(4):663-78.  
25  
26 469 53. Call JB, Shafer K. Gendered Manifestations of Depression and Help Seeking Among Men.  
27 470 *Am J Mens Health*. 2018;12(1):41-51.  
28  
29  
30 471 54. Bailey RK, Mokonogho J, Kumar A. Racial and ethnic differences in depression: current  
31 472 perspectives. *Neuropsychiatr Dis Treat*. 2019;15:603-9.  
32  
33 473 55. Ikram UZ, Snijder MB, de Wit MAS, Schene AH, Stronks K, Kunst AE. Perceived ethnic  
34 474 discrimination and depressive symptoms: the buffering effects of ethnic identity, religion  
35 475 and ethnic social network. *Soc Psychiatry Psychiatr Epidemiol*. 2016;51:679-88.  
36  
37  
38 476 56. Prakash J, Ramakrishnan T, Das RC, Srivastava K, Mehta S, Shashikumar R. Central  
39 477 registry in psychiatry: A structured review. *Ind Psychiatry J*. 2014;23(1):10-4.  
40  
41 478 57. Yang M, Loeb DF, Sprowell AJ, Trinkley KE. Design and Implementation of a Depression  
42 479 Registry for Primary Care. *Am J Med Qual Off J Am Coll Med Qual*. 2019;34(1):59-66.  
43  
44 480 58. Stewart R, Davis K. « Big data » in mental health research: current status and emerging  
45 481 possibilities. *Soc Psychiatry Psychiatr Epidemiol*. 2016;51(8):1055-72.  
46  
47  
48 482 59. Peixoto MF, Cesaretti M, Hood SD, Tavares A. Effects of SSRI medication on heart rate  
49 483 and blood pressure in individuals with hypertension and depression. *Clin Exp Hypertens N*  
50 484 *YN 1993*. 2019;41(5):428-33.  
51  
52 485 60. Offidani E, Benasi G, Charlson ME, Ravenell JE, Boutin-Foster C. Impact of Depression  
53 486 and Demoralization on Blood Pressure Control in African Americans with Hypertension:  
54 487 Findings from the TRIUMPH Trial. *J Racial Ethn Health Disparities*. 2018;5(5):913-8  
55  
56 488 61. Meng L, Chen D, Yang Y, Zheng Y, Hui R. Depression increases the risk of hypertension  
57 489 incidence: a meta-analysis of prospective cohort studies. *J Hypertens*. 2012;30(5):842-51.  
58  
59  
60

- 1  
2  
3 490 62. Cipriani A, Furukawa TA, Salanti G et al. Comparative efficacy and acceptability of 21  
4 491 antidepressant drugs for the acute treatment of adults with major depressive disorder: a  
5 492 systematic review and network meta-analysis. *Lancet*. 2018;391(10128):1357-66.  
6  
7 493 63. Sukhato K, Lotrakul M, Dellow A, Ittasakul P, Thakkinstian A, Anothaisintawee T.  
8 494 Efficacy of home-based non-pharmacological interventions for treating depression: a  
9 495 systematic review and network meta-analysis of randomised controlled trials. *BMJ Open*.  
10 496 2017;7(7):e014499.  
11  
12 497 64. Frost R, Bauernfreund Y, Walters K. Non-pharmacological interventions for  
13 498 depression/anxiety in older adults with physical comorbidities affecting functioning:  
14 499 systematic review and meta-analysis. *Int Psychogeriatr*. 2019;31(8):1121-36.  
15  
16 500 65. Bigna JJ, Nansseu JR, Kaze AD, et al. The Authors Respond. *Epidemiology* 2018;29(6):e58  
17 501 e59. doi: 10.1097/ede.0000000000000882 [published Online First: 2018/06/19]  
18  
19  
20  
21 502  
22  
23 503  
24  
25  
26  
27  
28  
29  
30  
31  
32  
33  
34  
35  
36  
37  
38  
39  
40  
41  
42  
43  
44  
45  
46  
47  
48  
49  
50  
51  
52  
53  
54  
55  
56  
57  
58  
59  
60



1  
2  
3 504 **Figures legend**  
4

5 505 Figure 1. Crude prevalence of depressive disorders/symptoms in people living with  
6  
7 506 hypertension in Africa  
8  
9  
10  
11  
12  
13  
14  
15  
16  
17  
18  
19  
20  
21  
22  
23  
24  
25  
26  
27  
28  
29  
30  
31  
32  
33  
34  
35  
36  
37  
38  
39  
40  
41  
42  
43  
44  
45  
46  
47  
48  
49  
50  
51  
52  
53  
54  
55  
56  
57  
58  
59  
60

For peer review only

507 **Table 1. Characteristics of included studies**

| Author            | Year | Design, Setting             | Diagnosis of conditions                                                  | Validity of the tool used | Language of the tool used  | Inclusion criteria                                                                                                                                                                        | Population                      | Period of inclusion | Country        | Sample |
|-------------------|------|-----------------------------|--------------------------------------------------------------------------|---------------------------|----------------------------|-------------------------------------------------------------------------------------------------------------------------------------------------------------------------------------------|---------------------------------|---------------------|----------------|--------|
| <b>Ademola</b>    | 2019 | Cross-sectional, Hospital   | Patient Health Questionnaire 9 (PHQ-9)                                   | Validated                 | NR                         | Age $\geq$ 18 y, diagnosis of hypertension, treatment with an antihypertensive medication for at least 12 months                                                                          | %Males: 41.7;<br>Mean age: 57   | 2013                | Ghana, Nigeria | 357    |
| <b>Bhana</b>      | 2015 | Cross-sectional, Population | Depression module of the Structured Clinical Interview for DSM-IV (SCID) | NR                        | English, seTswana          | Age $\geq$ 18 y, clinic attendance for routine chronic disease services (e.g., HIV, hypertension, diabetes) and ability to comprehend and complete study components in Tswana or English. | NR                              | 2014                | South Africa   | 345    |
| <b>Geldsetzer</b> | 2019 | Cross-sectional, Population | Center for Epidemiological Studies Depression (CES-D) screening tool     | NR                        | English, Shangaan          | Age $\geq$ 40 y and continuously living in the area during the 12 months prior to study enrolment                                                                                         | %Males: 37.4<br>Mean age : NR   | 2014-2015           | South Africa   | 1822   |
| <b>Grimsrud</b>   | 2009 | Cross-sectional, Population | Composite International Diagnostic Interview Version 3.0 (CIDI-3.0)      | NR                        | NR                         | South Africans $\geq$ 18 y who lived in households and hostels during the field period of the study                                                                                       | %Males: 28.0;<br>Mean age: 50.3 | 2002-2004           | South Africa   | 767    |
| <b>Hamer</b>      | 2012 | Cross-sectional, Population | Patient Health Questionnaire 9 (PHQ-9)                                   | Validated                 | English and local language | Age: 25-60 y with hypertension                                                                                                                                                            | NR                              | 2008-2009           | South Africa   | 254    |
| <b>Igwe</b>       | 2013 | Cross-sectional, Hospital   | Mini International Neuro-psychiatric Interview (MINI)                    | NR                        | NR                         | Age: 18 - 64 y. Hypertension for at least 1 year and stable without need for hospital admission for 3 months prior to assessment                                                          | %Males: 53.7;<br>Mean age: 50.4 | 2010-2011           | Nigeria        | 270    |
| <b>Iloh</b>       | 2018 | Cross-sectional, Hospital   | Patient Health Questionnaire 9 (PHQ-9)                                   | Validated                 | NR                         | Age $\geq$ 18 y with hypertension                                                                                                                                                         | %Males: 40.7;<br>Mean age : NR  | 2017                | Nigeria        | 142    |

|                    |      |                           |                                                       |           |                              |                                                                                                                                                                                                                           |                                  |           |              |     |
|--------------------|------|---------------------------|-------------------------------------------------------|-----------|------------------------------|---------------------------------------------------------------------------------------------------------------------------------------------------------------------------------------------------------------------------|----------------------------------|-----------|--------------|-----|
| <b>Kretchy</b>     | 2014 | Cross-sectional, Hospital | Depression Anxiety Stress Scale (DASS) – 21           | NR        | NR                           | Age $\geq$ 18 y, a diagnosis of hypertension, reporting prescription of at least one antihypertensive medication for a minimum of two months                                                                              | %Males: 37.3;<br>Mean age : NR   | 2012      | Ghana        | 400 |
| <b>Okunrinboye</b> | 2019 | Cross-sectional, Hospital | Mini International Neuro-psychiatric Interview (MINI) | NR        | Yoruba, English              | Age: 18 and 64 y who were diagnosed by a consultant physician at the Centre as suffering from hypertension and have been on anti-hypertensive medication for at least 6 months, spoke Yoruba or English language fluently | %Males: 38.0;<br>Mean age: 59.6y | 2012      | Nigeria      | 400 |
| <b>Umer</b>        | 2019 | Cross-sectional, Hospital | Patient Health Questionnaire 9 (PHQ-9)                | Validated | English, Afan Oromo, Amharic | Age $\geq$ 18 y, follow-up for hypertension                                                                                                                                                                               | %Males: 52.8;<br>Mean age : NR   | 2014      | Ethiopia     | 128 |
| <b>Yaméogo</b>     | 2015 | Cross-sectional, Hospital | Hospital Anxiety and Depression Scale (HADS)          | NR        | NR                           | Hypertensive consenting adult outpatients                                                                                                                                                                                 | %Males: 40.1;<br>Mean age: 54.6y | 2010-2011 | Burkina-Faso | 414 |

508 NR: not reported.

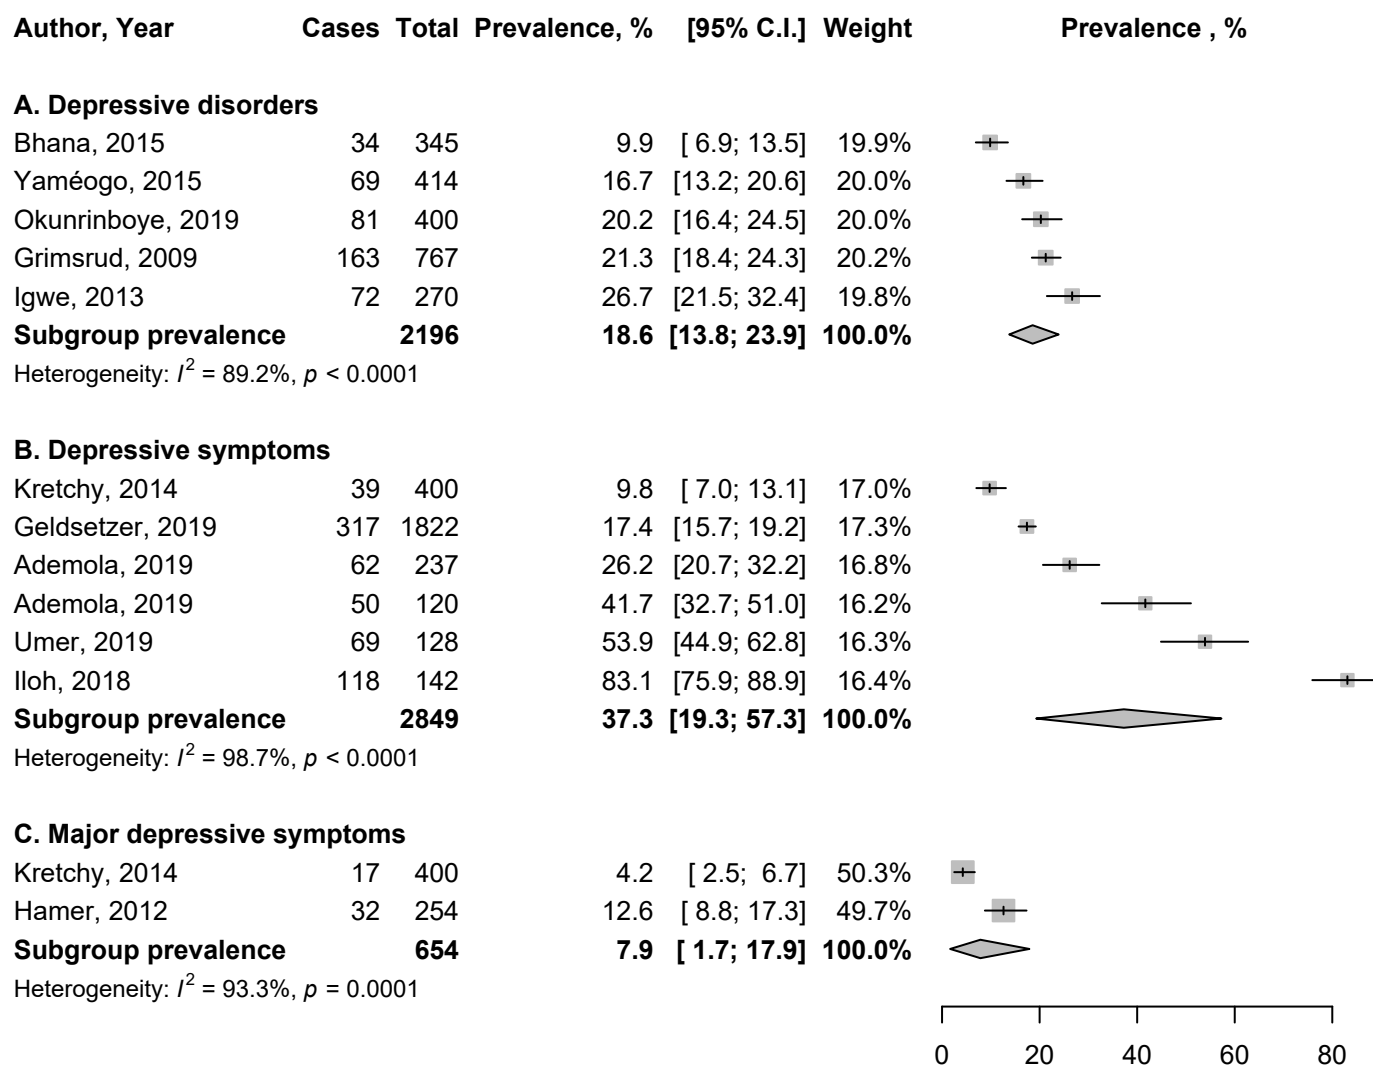

1  
2  
3 **Epidemiology of depressive disorders in people living with hypertension in**  
4  
5  
6 **Africa: a systematic review and meta-analysis**  
7  
8  
9

10 Francky Teddy **Endomba**, Mazou N. **Temgoua**, Jean Joel **Bigna**  
11  
12  
13

14  
15 **APPENDIX**  
16  
17  
18  
19  
20

21  
22  
23  
24  
25  
26  
27  
28  
29  
30  
31  
32  
33  
34  
35  
36  
37  
38  
39  
40  
41  
42  
43  
44  
45  
46  
47  
48  
49  
50  
51  
52  
53  
54  
55  
56  
57  
58  
59  
60

|                                                                                                 |   |
|-------------------------------------------------------------------------------------------------|---|
| Supplementary Table 1. Search strategy.....                                                     | 2 |
| Supplementary Table 2. Methodological quality of included studies.....                          | 4 |
| Supplementary Figure 1. PRISMA flow diagram .....                                               | 5 |
| Supplementary Figure 2. Meta-analysis prevalence of depressive disorders by setting.....        | 6 |
| Supplementary Figure 3. Meta-analysis prevalence of depressive symptoms by setting .....        | 6 |
| Supplementary Figure 4. Meta-analysis prevalence of major depressive disorders by setting ..... | 7 |
| Supplementary Figure 5. Meta-analysis prevalence of depressive disorders by sex.....            | 8 |
| Supplementary Figure 6. Meta-analysis prevalence of depressive symptoms by sex.....             | 8 |

Supplementary Table 1. Search strategy

| Search | Search terms                                                                                                                                                                                                                                                                                                                                                                                                                                                                                                                                                                                                                                                                                                                                                                                                                                                                                                                                                                                                                                                                                                                                                                                                                                                                                                                                                                                                                                                                                                                                                                                                                                                                                                                                                                                                                                                                                                                                                                                                                                                                                                                                                                                                                                                                                                                                                                                                                                                                                                                                                                                                                                                                                                                                                                                                                                                                    |
|--------|---------------------------------------------------------------------------------------------------------------------------------------------------------------------------------------------------------------------------------------------------------------------------------------------------------------------------------------------------------------------------------------------------------------------------------------------------------------------------------------------------------------------------------------------------------------------------------------------------------------------------------------------------------------------------------------------------------------------------------------------------------------------------------------------------------------------------------------------------------------------------------------------------------------------------------------------------------------------------------------------------------------------------------------------------------------------------------------------------------------------------------------------------------------------------------------------------------------------------------------------------------------------------------------------------------------------------------------------------------------------------------------------------------------------------------------------------------------------------------------------------------------------------------------------------------------------------------------------------------------------------------------------------------------------------------------------------------------------------------------------------------------------------------------------------------------------------------------------------------------------------------------------------------------------------------------------------------------------------------------------------------------------------------------------------------------------------------------------------------------------------------------------------------------------------------------------------------------------------------------------------------------------------------------------------------------------------------------------------------------------------------------------------------------------------------------------------------------------------------------------------------------------------------------------------------------------------------------------------------------------------------------------------------------------------------------------------------------------------------------------------------------------------------------------------------------------------------------------------------------------------------|
| #1     | 'africa'/exp OR africa OR 'algeria'/exp OR algeria OR 'angola'/exp OR angola OR 'benin'/exp OR benin OR 'botswana'/exp OR botswana OR 'burkina faso'/exp OR 'burkina faso' OR 'burundi'/exp OR burundi OR 'cameroon'/exp OR cameroon OR 'canary islands'/exp OR 'canary islands' OR 'cape verde'/exp OR 'cape verde' OR 'central african republic'/exp OR 'central african republic' OR 'chad'/exp OR chad OR 'comoros'/exp OR comoros OR 'congo'/exp OR congo OR 'democratic republic of congo' OR 'djibouti'/exp OR djibouti OR 'egypt'/exp OR egypt OR 'equatorial guinea'/exp OR 'equatorial guinea' OR 'eritrea'/exp OR eritrea OR 'ethiopia'/exp OR ethiopia OR 'gabon'/exp OR gabon OR 'gambia'/exp OR gambia OR 'ghana'/exp OR ghana OR 'guinea'/exp OR guinea OR 'guinea bissau'/exp OR 'guinea bissau' OR 'ivory coast'/exp OR 'ivory coast' OR 'cote ivoire' OR 'jamahiriya' OR 'kenya'/exp OR kenya OR 'lesotho'/exp OR lesotho OR 'liberia'/exp OR liberia OR 'libya'/exp OR libya OR 'madagascar'/exp OR madagascar OR 'malawi'/exp OR malawi OR 'mali'/exp OR mali OR 'mauritania'/exp OR mauritania OR 'mauritius'/exp OR mauritius OR 'mayotte'/exp OR mayotte OR 'morocco'/exp OR morocco OR 'mozambique'/exp OR mozambique OR 'namibia'/exp OR namibia OR 'niger'/exp OR niger OR 'nigeria'/exp OR nigeria OR 'principe' OR 'reunion'/exp OR reunion OR 'rwanda'/exp OR rwanda OR 'sao tome' OR 'senegal'/exp OR senegal OR 'seychelles'/exp OR seychelles OR 'sierra leone'/exp OR 'sierra leone' OR 'somalia'/exp OR somalia OR 'south africa'/exp OR 'south africa' OR 'st helena'/exp OR 'st helena' OR 'sudan'/exp OR sudan OR 'swaziland'/exp OR swaziland OR 'tanzania'/exp OR tanzania OR 'togo'/exp OR togo OR 'tunisia'/exp OR tunisia OR 'uganda'/exp OR uganda OR 'western sahara'/exp OR 'western sahara' OR 'zaire'/exp OR zaire OR 'zambia'/exp OR zambia OR 'zimbabwe'/exp OR zimbabwe OR 'central africa'/exp OR 'central africa' OR 'central african'/exp OR 'central african' OR 'west africa'/exp OR 'west africa' OR 'west african'/exp OR 'west african' OR 'western africa'/exp OR 'western africa' OR 'western african'/exp OR 'western african' OR 'east africa'/exp OR 'east africa' OR 'east african'/exp OR 'east african' OR 'eastern africa'/exp OR 'eastern africa' OR 'eastern african'/exp OR 'eastern african' OR 'north africa'/exp OR 'north africa' OR 'north african'/exp OR 'north african' OR 'northern africa'/exp OR 'northern africa' OR 'northern african'/exp OR 'northern african' OR 'south african'/exp OR 'south african' OR 'southern africa'/exp OR 'southern africa' OR 'southern african'/exp OR 'southern african' OR 'sub saharan africa'/exp OR 'sub saharan africa' OR 'sub saharan african'/exp OR 'sub saharan african' OR 'subsaharan africa'/exp OR 'subsaharan africa' OR 'subsaharan african' |
| #2     | 'depression'/exp OR depression OR 'depressive disorder'/exp OR 'depressive disorder' OR 'depressive symptom'/exp OR 'depressive symptom' OR 'depressive neuros*' OR 'depressive syndrome*'                                                                                                                                                                                                                                                                                                                                                                                                                                                                                                                                                                                                                                                                                                                                                                                                                                                                                                                                                                                                                                                                                                                                                                                                                                                                                                                                                                                                                                                                                                                                                                                                                                                                                                                                                                                                                                                                                                                                                                                                                                                                                                                                                                                                                                                                                                                                                                                                                                                                                                                                                                                                                                                                                      |

|    |                                                                                                                                                                |
|----|----------------------------------------------------------------------------------------------------------------------------------------------------------------|
| #3 | 'hypertension'/exp OR hypertension OR 'high blood pressure'/exp OR 'high blood pressure' OR (high AND ('blood'/exp OR blood) AND ('pressure'/exp OR pressure)) |
| #4 | #1 AND #2 AND #3                                                                                                                                               |

For peer review only

1  
2  
3  
4  
5  
6  
7  
8  
9  
10  
11  
12  
13  
14  
15  
16  
17  
18  
19  
20  
21  
22  
23  
24  
25  
26  
27  
28  
29  
30  
31  
32  
33  
34  
35  
36  
37  
38  
39  
40  
41  
42  
43  
44  
45  
46

Supplementary Table 2. Methodological quality of included studies

| <b>Author, Year</b>      | <b>Sampling method</b> | <b>Timing of data collection</b> | <b>Sample size adequate</b> | <b>Response rate</b> | <b>Same method of data collection for all participants</b> | <b>SUMMARY (Risk of bias)</b> |
|--------------------------|------------------------|----------------------------------|-----------------------------|----------------------|------------------------------------------------------------|-------------------------------|
| <b>Ademola, 2019</b>     | Convenience            | Prospectively                    | No                          | Not described        | Yes                                                        | Moderate                      |
| <b>Bhana, 2015</b>       | Convenience            | Prospectively                    | Yes                         | Not described        | Yes                                                        | Moderate                      |
| <b>Geldsetzer, 2019</b>  | Stratified Random      | Prospectively                    | Yes                         | Adequate             | Yes                                                        | Low                           |
| <b>Grimsrud, 2009</b>    | Stratified Multistage  | Prospectively                    | Yes                         | Not described        | Yes                                                        | Low                           |
| <b>Hamer, 2012</b>       | Convenience            | Prospectively                    | Yes                         | Not described        | Yes                                                        | Moderate                      |
| <b>Igwe, 2013</b>        | Convenience            | Prospectively                    | Yes                         | Not described        | Yes                                                        | Moderate                      |
| <b>Iloh, 2018</b>        | Convenience            | Prospectively                    | Yes                         | Not described        | Yes                                                        | Moderate                      |
| <b>Kretchy, 2014</b>     | Time-Location          | Prospectively                    | Yes                         | Not described        | Yes                                                        | Moderate                      |
| <b>Okunrinboye, 2019</b> | Systematic Random      | Prospectively                    | Yes                         | Not described        | Yes                                                        | Low                           |
| <b>Umer, 2019</b>        | Convenience            | Prospectively                    | No                          | Adequate             | Yes                                                        | Moderate                      |
| <b>Yaméogo, 2015</b>     | Convenience            | Prospectively                    | Yes                         | Not described        | Yes                                                        | Moderate                      |



Supplementary Figure 1. PRISMA flow diagram

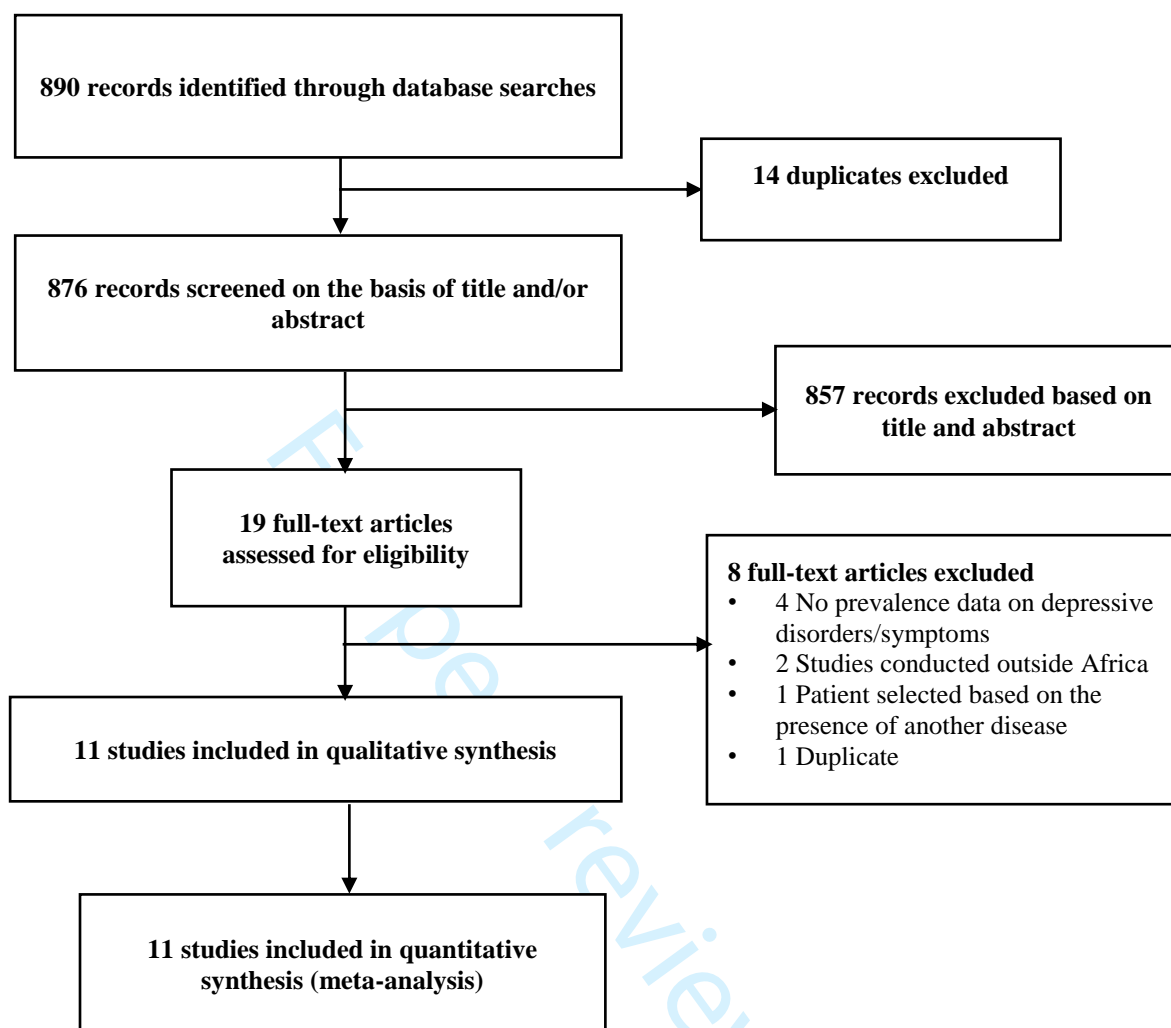

Supplementary Figure 2. Meta-analysis prevalence of depressive disorders by setting

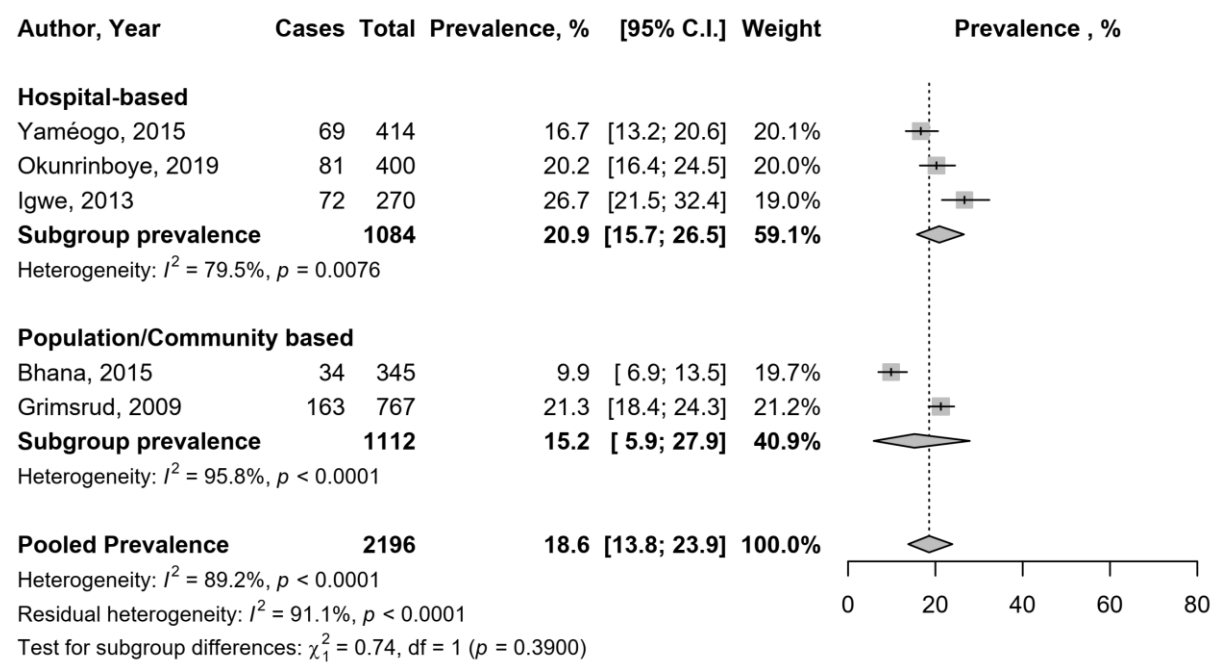

Supplementary Figure 3. Meta-analysis prevalence of depressive symptoms by setting

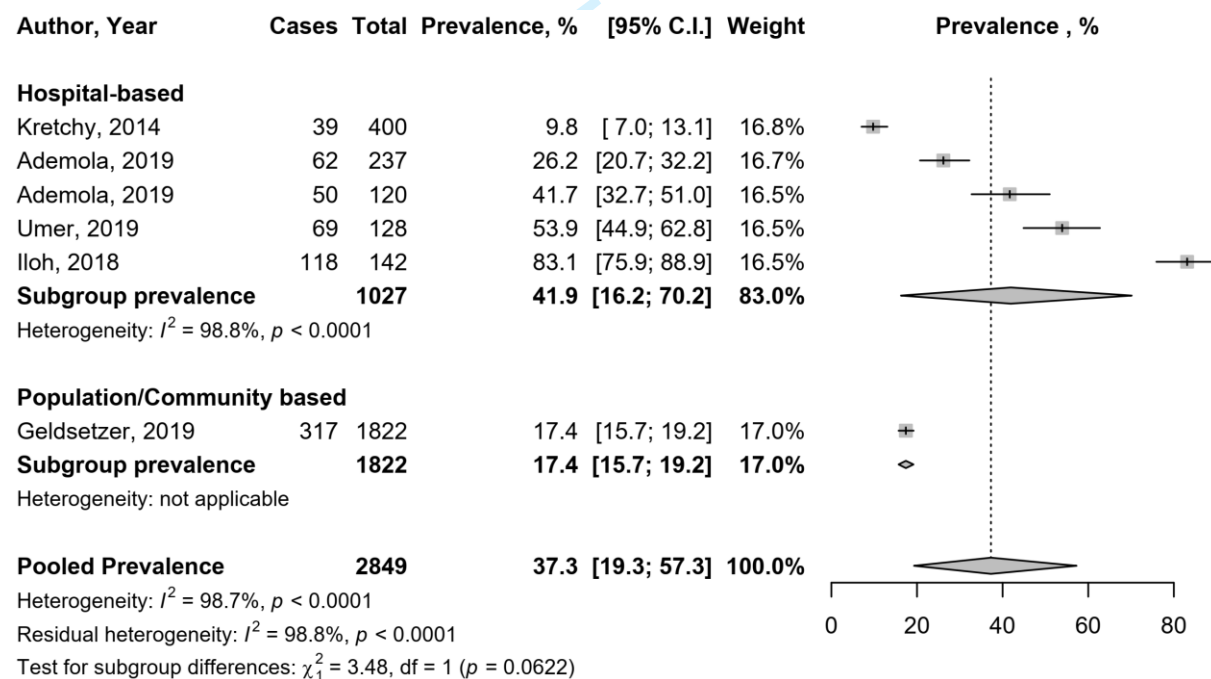

Supplementary Figure 4. Meta-analysis prevalence of major depressive disorders by setting

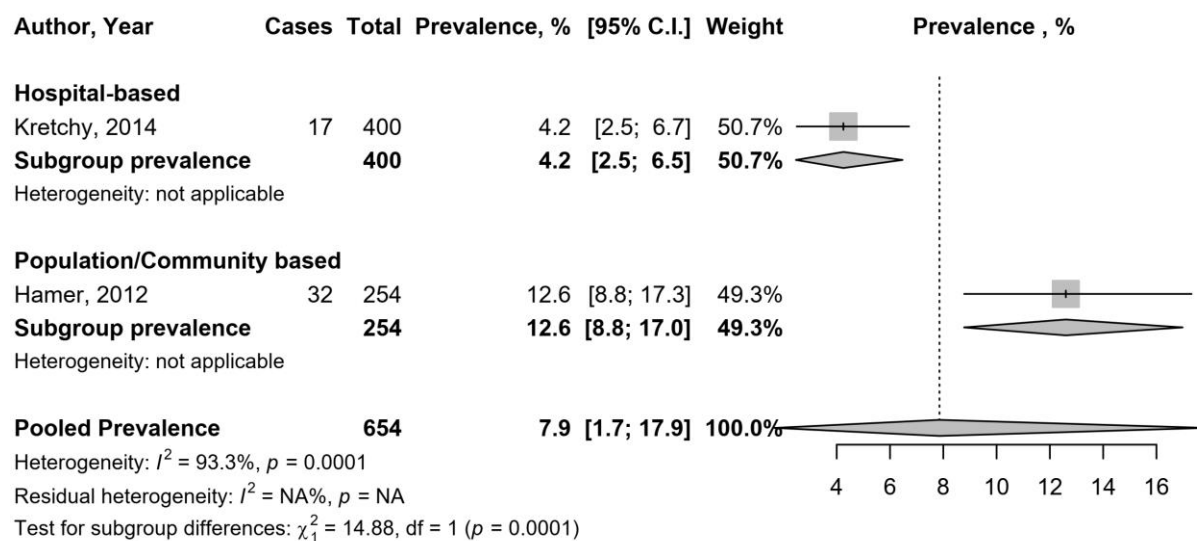

peer review only

Supplementary Figure 5. Meta-analysis prevalence of depressive disorders by sex

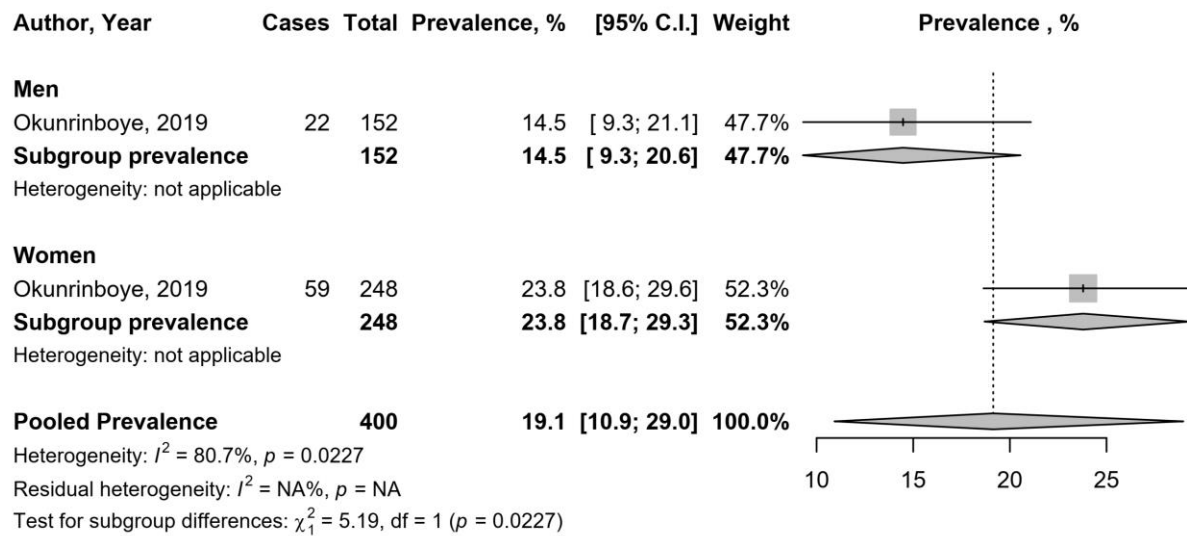

Supplementary Figure 6. Meta-analysis prevalence of depressive symptoms by sex

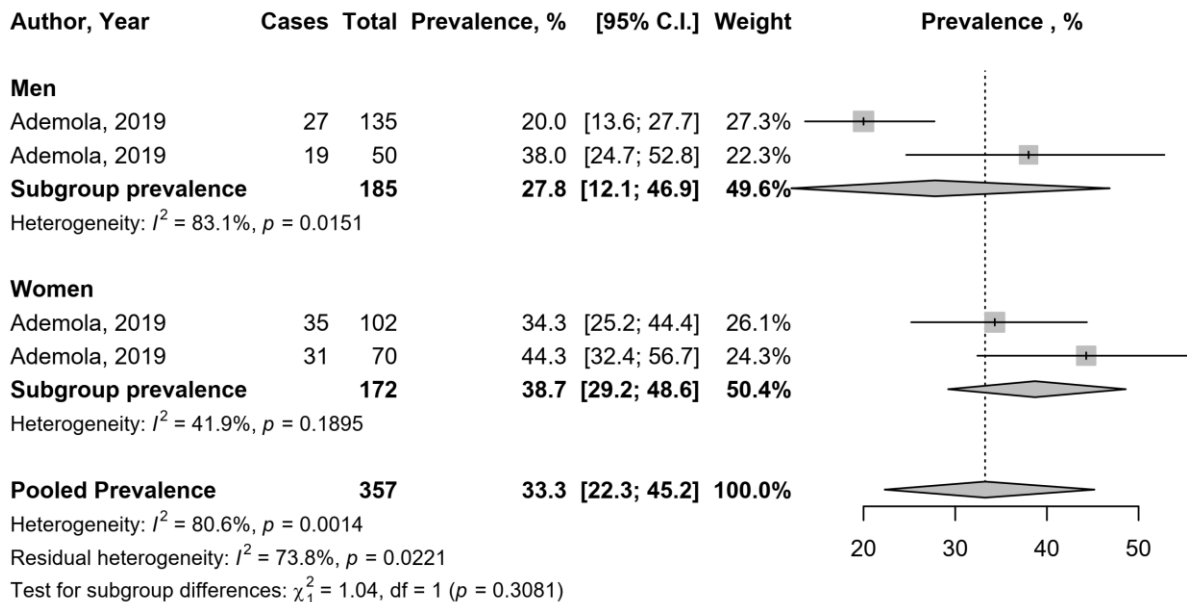



# PRISMA 2009 Checklist

| Section/topic                      | #  | Checklist item                                                                                                                                                                                                                                                                                              | Reported on page # |
|------------------------------------|----|-------------------------------------------------------------------------------------------------------------------------------------------------------------------------------------------------------------------------------------------------------------------------------------------------------------|--------------------|
| <b>TITLE</b>                       |    |                                                                                                                                                                                                                                                                                                             |                    |
| Title                              | 1  | Identify the report as a systematic review, meta-analysis, or both.                                                                                                                                                                                                                                         | 1                  |
| <b>ABSTRACT</b>                    |    |                                                                                                                                                                                                                                                                                                             |                    |
| Structured summary                 | 2  | Provide a structured summary including, as applicable: background; objectives; data sources; study eligibility criteria, participants, and interventions; study appraisal and synthesis methods; results; limitations; conclusions and implications of key findings; systematic review registration number. | 2                  |
| <b>INTRODUCTION</b>                |    |                                                                                                                                                                                                                                                                                                             |                    |
| Rationale                          | 3  | Describe the rationale for the review in the context of what is already known.                                                                                                                                                                                                                              | 5-6                |
| Objectives                         | 4  | Provide an explicit statement of questions being addressed with reference to participants, interventions, comparisons, outcomes, and study design (PICOS).                                                                                                                                                  | 6                  |
| <b>METHODS</b>                     |    |                                                                                                                                                                                                                                                                                                             |                    |
| Protocol and registration          | 5  | Indicate if a review protocol exists, if and where it can be accessed (e.g., Web address), and, if available, provide registration information including registration number.                                                                                                                               | 6                  |
| Eligibility criteria               | 6  | Specify study characteristics (e.g., PICOS, length of follow-up) and report characteristics (e.g., years considered, language, publication status) used as criteria for eligibility, giving rationale.                                                                                                      | 6-7                |
| Information sources                | 7  | Describe all information sources (e.g., databases with dates of coverage, contact with study authors to identify additional studies) in the search and date last searched.                                                                                                                                  | 7                  |
| Search                             | 8  | Present full electronic search strategy for at least one database, including any limits used, such that it could be repeated.                                                                                                                                                                               | 7, Appendix        |
| Study selection                    | 9  | State the process for selecting studies (i.e., screening, eligibility, included in systematic review, and, if applicable, included in the meta-analysis).                                                                                                                                                   | 7                  |
| Data collection process            | 10 | Describe method of data extraction from reports (e.g., piloted forms, independently, in duplicate) and any processes for obtaining and confirming data from investigators.                                                                                                                                  | 7-8                |
| Data items                         | 11 | List and define all variables for which data were sought (e.g., PICOS, funding sources) and any assumptions and simplifications made.                                                                                                                                                                       | 7-8                |
| Risk of bias in individual studies | 12 | Describe methods used for assessing risk of bias of individual studies (including specification of whether this was done at the study or outcome level), and how this information is to be used in any data synthesis.                                                                                      | 8                  |
| Summary measures                   | 13 | State the principal summary measures (e.g., risk ratio, difference in means).                                                                                                                                                                                                                               | 8                  |
| Synthesis of results               | 14 | Describe the methods of handling data and combining results of studies, if done, including measures of consistency (e.g., $I^2$ ) for each meta-analysis.                                                                                                                                                   | 8                  |

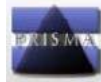

# PRISMA 2009 Checklist

Page 1 of 2

| Section/topic                 | #  | Checklist item                                                                                                                                                                                           | Reported on page # |
|-------------------------------|----|----------------------------------------------------------------------------------------------------------------------------------------------------------------------------------------------------------|--------------------|
| Risk of bias across studies   | 15 | Specify any assessment of risk of bias that may affect the cumulative evidence (e.g., publication bias, selective reporting within studies).                                                             | 8                  |
| Additional analyses           | 16 | Describe methods of additional analyses (e.g., sensitivity or subgroup analyses, meta-regression), if done, indicating which were pre-specified.                                                         | 8                  |
| <b>RESULTS</b>                |    |                                                                                                                                                                                                          |                    |
| Study selection               | 17 | Give numbers of studies screened, assessed for eligibility, and included in the review, with reasons for exclusions at each stage, ideally with a flow diagram.                                          | 9                  |
| Study characteristics         | 18 | For each study, present characteristics for which data were extracted (e.g., study size, PICOS, follow-up period) and provide the citations.                                                             | 9                  |
| Risk of bias within studies   | 19 | Present data on risk of bias of each study and, if available, any outcome level assessment (see item 12).                                                                                                | 9, Appendix        |
| Results of individual studies | 20 | For all outcomes considered (benefits or harms), present, for each study: (a) simple summary data for each intervention group (b) effect estimates and confidence intervals, ideally with a forest plot. | 9, Table 1         |
| Synthesis of results          | 21 | Present results of each meta-analysis done, including confidence intervals and measures of consistency.                                                                                                  | 9-10               |
| Risk of bias across studies   | 22 | Present results of any assessment of risk of bias across studies (see Item 15).                                                                                                                          | 9-10               |
| Additional analysis           | 23 | Give results of additional analyses, if done (e.g., sensitivity or subgroup analyses, meta-regression [see Item 16]).                                                                                    | 9-10               |
| <b>DISCUSSION</b>             |    |                                                                                                                                                                                                          |                    |
| Summary of evidence           | 24 | Summarize the main findings including the strength of evidence for each main outcome; consider their relevance to key groups (e.g., healthcare providers, users, and policy makers).                     | 10                 |
| Limitations                   | 25 | Discuss limitations at study and outcome level (e.g., risk of bias), and at review-level (e.g., incomplete retrieval of identified research, reporting bias).                                            | 12                 |
| Conclusions                   | 26 | Provide a general interpretation of the results in the context of other evidence, and implications for future research.                                                                                  | 12                 |
| <b>FUNDING</b>                |    |                                                                                                                                                                                                          |                    |
| Funding                       | 27 | Describe sources of funding for the systematic review and other support (e.g., supply of data); role of funders for the systematic review.                                                               | 13                 |

41

42 From: Moher D, Liberati A, Tetzlaff J, Altman DG, The PRISMA Group (2009). Preferred Reporting Items for Systematic Reviews and Meta-Analyses: The PRISMA Statement. PLoS Med 6(7): e1000097.  
 43 doi:10.1371/journal.pmed1000097

44 For more information, visit: [www.prisma-statement.org](http://www.prisma-statement.org).

45 For peer review only - <http://bmjopen.bmj.com/site/about/guidelines.xhtml>

46

47
